# Supplementary material for: Molecular design of near-infrared (NIR) fluorescent probes targeting exopeptidase and application for detection of dipeptidyl peptidase 4 (DPP-4) activity
Source: Royal Society of Chemistry journal article supplement (doi:10.1039/d1cb00253h), 2022-01-01
Supplement: d1cb00253h1.pdf [file d1cb00253h1.pdf]

## Supporting Information

### **Molecular design of near-infrared (NIR) fluorescent probes targeting exo-peptidase and application for detection of dipeptidyl peptidase 4 (DPP-4) activity**

Yuki Hoshino,<sup>a</sup> Kenjiro Hanaoka,<sup>\*,b</sup> Kei Sakamoto,<sup>c</sup> Masahiro Yasunaga,<sup>d</sup> Takashi Kojima,<sup>e</sup> Daisuke Kotani,<sup>e</sup> Ayumu Nomoto,<sup>a</sup> Eita Sasaki,<sup>b</sup> Toru Komatsu,<sup>a</sup> Tasuku Ueno,<sup>a</sup> Hiroyuki Takamaru,<sup>f</sup> Yutaka Saito,<sup>f</sup> Yasuyuki Seto,<sup>b</sup> and Yasuteru Urano<sup>\*,a,g</sup>

<sup>a</sup> Graduate School of Pharmaceutical Sciences, <sup>g</sup> Graduate School of Medicine, The University of Tokyo, 7-3-1 Hongo, Bunkyo-ku, Tokyo 113-0033, Japan. <sup>b</sup> Graduate School of Pharmaceutical Sciences, Keio University, 1-5-30 Shibakoen, Minato-ku, Tokyo 105-8512, Japan. <sup>c</sup> Department of Gastrointestinal Surgery, Graduate School of Medicine, The University of Tokyo, 7-3-1 Hongo, Bunkyo-ku, Tokyo 113-8655, Japan. <sup>d</sup> Division of Developmental Therapeutics, Research Center for Innovative Oncology, National Cancer Center Hospital East, 6-5-1 Kashiwanoha, Kashiwa, Chiba 277-8577, Japan. <sup>e</sup> Department of Gastroenterology and Gastrointestinal Oncology, National Cancer Center Hospital East, 6-5-1, Kashiwanoha, Kashiwa-shi, Chiba, 277-8577, Japan. <sup>f</sup> Endoscopy Division, National Cancer Center Hospital, 5-1-1 Tsukiji, Chuo-ku, Tokyo 104-0045, Japan.

\*Correspondence and requests for materials should be addressed to Y.U. and K.H. (Y.U., email: uranokun@m.u-tokyo.ac.jp) (K.H., email: khanaoka@keio.jp).

## Experimental details

**General procedure and materials:** Reagents and solvents were of the best grade available, purchased from Tokyo Chemical Industries, Wako Pure Chemical, Sigma-Aldrich, Kanto Chemical Company, Dojindo, Watanabe Chemical Industry, Gibco, Invitrogen and Thermo Scientific, and were used without further purification. Mice (BALB/cAJcl, BALB/cAJcl-*nu-nu*) were purchased from CLEA Japan, Inc. Saline was purchased from Fuso Pharmaceutical Industry, Ltd. Reactions were monitored by means of TLC and ESI mass spectrometry, or by UPLC-MS. All compounds were purified on a silica gel column, or by GPC, reversed-phase MPLC and/or preparative HPLC.

**Enzymes and inhibitors:** Leucine aminopeptidase, microsomal from porcine kidney (L5006), human recombinant dipeptidyl peptidase 4 (D4943), human recombinant dipeptidyl peptidase 7 (D3321), human recombinant dipeptidyl peptidase 8 (D3196), human recombinant dipeptidyl peptidase 9 (D3071), recombinant prolyl oligopeptidase (O9515), prolidase from porcine kidney (P6675) and human recombinant fibroblast active protein (SRP0294) were purchased from Sigma-Aldrich. Bestatin (58970-76-6) was purchased from Wako Pure Chemical. Sitagliptin phosphate (13252) was purchased from Cayman Chemical Company. K579 (D3572) was purchased from Sigma-Aldrich. Linagliptin (CS0637) was purchased from ChemScene LLC.

**Instruments:** NMR spectra were recorded on a JEOL ECZ-400S instrument at 400 MHz for  $^1\text{H}$  NMR and at 100 MHz for  $^{13}\text{C}$  NMR. Mass spectra (MS) were measured with a JEOL JMS-T100LC AccuToF (ESI). Column chromatography using silica gel was performed on a MPLC system (Yamazen Smart Flash EPCLC AI-5805 (Tokyo, Japan)). Reversed-phase MPLC purification was performed on an Isolera<sup>TM</sup> One (Biotage) equipped with a SNAP Ultra C18 30 g (Biotage). Preparative HPLC was performed on an Inertsil ODS-3 (10.0  $\times$  250 mm) column (GL Sciences Inc.) using an HPLC system composed of a pump (PU-2080, JASCO) and a detector (MD-2015 or FP-2025, JASCO), using eluent A ( $\text{H}_2\text{O}$  containing 0.1% TFA (v/v)) and eluent B ( $\text{CH}_3\text{CN}$  with 20%  $\text{H}_2\text{O}$  containing 0.1% TFA (v/v)) or eluent C ( $\text{H}_2\text{O}$  containing 100 mM TEAA, i.e., 100 mM triethylamine acetate aqueous solution) and eluent D ( $\text{CH}_3\text{CN}$  with 20%  $\text{H}_2\text{O}$  containing 100 mM TEAA) at the flow rate of 3 or 5

mL/min. HPLC analyses were performed on a system composed of a pump (PU-2080, JASCO) and a detector (MD-2015, JASCO), using eluent A and eluent B at the flow rate of 1 mL/min. GPC purification was performed on a recycle preparative HPLC LC-9110 NEXT (Japan Analytical Industry) equipped with a JAIGEL-2HR column (20 mm × 600 mm, Japan Analytical Industry). Peptide synthesis was performed on a Syro I instrument (Biotage). Absorption spectra were obtained with a Shimadzu UV-1850 (Tokyo, Japan). Fluorescence spectroscopic studies were performed with a Hitachi F7100 (Tokyo, Japan). The slit width was 5 nm for both excitation and emission. The photomultiplier voltage was 700 V. Absolute fluorescence quantum yields were determined with a Hamamatsu Photonics Quantaaurus-QY.

**Measurement of photophysical properties:** Photophysical properties of dyes were examined in PBS (pH = 7.4) containing 0.1% (v/v) DMSO as a co-solvent. The absolute fluorescence quantum yields ( $\Phi_f$ ) were determined with a Hamamatsu Photonics Quantaaurus-QY.

**Fluorometric assay:** Unless otherwise mentioned, the fluorometric assay of enzymes and cell lysates was performed in 10 mM HEPES buffer (pH = 7.4) at 37°C. Disposable cells, quartz cells or flat-bottom 384-well plates (Corning, 4511) were used for the assay. Fluorescence was detected with a fluorometer (Hitachi F7100 (Tokyo, Japan)) or a microplate reader (Perkin Elmer, EnVision 2103 Multilabel Reader).

**Kinetic assay:** Enzymatic reactions with 1, 5, 10, 25, 50 and 100  $\mu$ M probes were performed in 20  $\mu$ L of 10 mM HEPES buffer (pH = 7.4) containing 1% DMSO as a co-solvent using 2.4 ng DPP-4 or 0.22 ng LAP at 37°C. Flat-bottom 384-well plates (Corning, 4511) were used for the assay. Fluorescence was measured with a microplate reader (Perkin Elmer, EnVision 2103 Multilabel Reader). The excitation and emission wavelengths were 620 nm and 685 nm, respectively. Initial velocity, calculated from the change in fluorescence at 685 nm, was plotted against probe concentration, and fitted to a Michaelis-Menten equation.

**Cell culture:** H226 cells (ATCC) were cultured in RPMI1640 Medium (Roswell Park Memorial Institute 1640 Medium, Gibco) containing 10% fetal bovine serum (Gibco) and 1% penicillin streptomycin (Gibco). A549 cells (RIKEN BRC) and HEK293 cells (ATCC) were cultured in DMEM (Dulbecco's modified Eagle's medium, Gibco)

containing 10% fetal bovine serum and 1% penicillin streptomycin. The established cell line KYSE270, originated from well-differentiated human esophageal squamous cell carcinoma, was provided by Y. Shimada, Kyoto University, Japan.<sup>[1]</sup> KYSE270 cells were cultured in a 1-to-1 mixture of Ham's F12 Nutrient Mixture (Gibco) and RPMI1640 Medium containing 2% fetal bovine serum and 1% penicillin streptomycin. All cells were maintained at 37°C under an atmosphere of 5% CO<sub>2</sub> in air.

**Fluorescence confocal microscopy with DPP-4 inhibitors:** H226 and KYSE270 cells were plated on 35 mm glass-bottomed dishes (Matsunami Glass Ind., Ltd) and cultured for one day with the appropriate media. Cells were washed with 1 mL HBSS and pre-incubated with or without DPP-4 inhibitor (18 µM sitagliptin) in 1 mL HBSS containing 0.2% DMSO as a co-solvent at 37°C under an atmosphere of 5% CO<sub>2</sub> in air for 30 min. Cells were washed with 1 mL HBSS, and then incubated with 1 µM **GP-SiR640**, **EP-SiR640**, **DP-SiR640** or **SP-SiR640** in 1 mL HBSS containing 0.1% DMSO as a co-solvent for up to 60 min. Fluorescence images were captured using a Leica Application Suite Advanced (LAS-AF) instrument with a Leica TCS SP8 and a 63× objective lens. The light source was a HeNe laser. The excitation and emission wavelengths were 633 nm and 660-695 nm, respectively.

**Preparation of cultured cell lysate:** H226, A549, HEK293 and KYSE270 cells were cultured in 10 cm dishes (Thermo Scientific) with the appropriate media. When the cells reached 70-80% confluency, they were washed with PBS (-) twice, and lysed by addition of 1 mL CellLyticM (Sigma-Aldrich, C2978) to the plate, followed by incubation at room temperature for 15 min. The solution was collected and centrifuged (14,000 rpm × 10 min at 4°C). The supernatant was collected, aliquoted, and stored at -80°C. Protein concentration was determined with the standard BCA assay, and the concentrations of the cell lysates were adjusted to 0.5 mg/mL with PBS (-). The diluted lysate was aliquoted for single use, and stored at -80°C.

**Fluorescence confocal microscopy with various cells:** H226, KYSE270, A549 and HEK293 cells were plated on 35 mm glass-bottomed dishes (Matsunami Glass Ind., Ltd) and cultured for one day with the appropriate media. Cells were washed with 1 mL HBSS and then incubated with 1 µM **EP-SiR640** in 1 mL HBSS containing 0.1% DMSO as a co-solvent for 10 min. Fluorescence images were captured using LAS-AF instrument with a Leica TCS



SP8 and a 63× objective lens. The light source was a HeNe laser. The excitation and emission wavelengths were 633 nm and 660-695 nm, respectively.

***In vivo* imaging of mice:** All procedures were approved by the Animal Care and Use Committee of the University of Tokyo. BALB/cAJcl mice (male, 6 weeks old) were purchased from CLEA Japan, Inc. Mice were orally administered with saline or the DPP-4 inhibitor (10 mg/kg/day sitagliptin in saline, or 1 mg/kg/day linagliptin in saline) for 1 week. Then the mice were anesthetized with isoflurane, the abdominal cavities were exposed, and 100  $\mu$ M **EP-SiR640** in 100  $\mu$ L saline containing 1% DMSO as a co-solvent was injected via the tail vein. Fluorescence images were captured with a Maestro<sup>TM</sup> In-Vivo Imaging System (PerkinElmer, Inc., MA, USA) equipped with an excitation filter set at 635 nm (616-661 nm) and a 675 nm emission long-path filter. Fluorescence images at 700 nm were extracted and the fluorescence intensity was quantified by ImageJ software.

***Ex vivo* imaging of mice:** All procedures were approved by the Animal Care and Use Committee of the University of Tokyo. BALB/cAJcl mice (male, 6 weeks old) were purchased from CLEA Japan, Inc. Mice were orally administered with saline or the DPP-4 inhibitor (0.1, 1 or 10 mg/kg/day sitagliptin in saline, or 0.01, 0.1, 1 mg/kg/day linagliptin in saline) for 3 days. Then the mice were anesthetized with isoflurane, and sacrificed by cervical dislocation. The organs (kidneys, spleen, liver, heart, lung, stomach, intestines, caecum) were extracted and washed with saline twice. All organs were incubated with 10  $\mu$ M **EP-SiR640** in 1.5 mL saline containing 0.1% DMSO as a co-solvent for 20 min. Fluorescence images were captured with a Maestro<sup>TM</sup> In-Vivo Imaging System (PerkinElmer, Inc., MA, USA) equipped with an excitation filter set at 635 nm (616-661 nm) and a 675 nm emission long-path filter. Fluorescence images at 700 nm were extracted and the fluorescence intensity was quantified by ImageJ software.

***In vivo* imaging of tumor-bearing mice:** All procedures were approved by the Animal Care and Use Committee of the University of Tokyo. BALB/cAJcl-*nu-nu* mice (female, 5 weeks old) were purchased from CLEA Japan, Inc.  $1.0 \times 10^7$  H226 cells suspended in a 1-to-1 mixture of PBS (pH = 7.4) and Matrigel (Corning, 356234) were injected into the left flank 3-4 weeks before imaging. For imaging, the mice were anesthetized with isoflurane and

intratumorally administered with saline or DPP-4 inhibitor (0.05 mg sitagliptin in 10  $\mu$ L saline). After 20 min, the mice were intratumorally injected with 100  $\mu$ M **EP-SiR640** in 10  $\mu$ L saline. Fluorescence images were captured with a Maestro<sup>TM</sup> In-Vivo Imaging System (PerkinElmer, Inc., MA, USA) equipped with an excitation filter set at 635 nm (616-661 nm) and a 675 nm emission long-path filter. Fluorescence images at 700 nm were extracted and the fluorescence intensity was quantified by ImageJ software.

**Fluorescence imaging of sections of biopsy tumors and normal tissues from esophageal cancer patients:** The experimental protocols and procedures were approved (No. 2018-064) by the institutional review board of the National Cancer Center, Japan. All methods were performed in accordance with the relevant guidelines and regulations. Tumors and normal tissues from esophageal cancer patients were resected, and stored at -80°C. Each specimen was sliced to 10  $\mu$ m with a cryostat (LEICA CM1860), mounted on a slide glass, air-dried, and stored again at -80°C. Each sample was incubated with 1  $\mu$ M **EP-SiR640** and DAPI (Invitrogen) in 1 mL HBSS containing 0.1% DMSO as a co-solvent for 50 min. Fluorescence images were captured with a KEYENCE Fluorescence Microscope BZ-X. The excitation and emission wavelengths were 620/60 and 700/75 nm for **EP-SiR640**, and 360/40 and 460/50 nm for DAPI, respectively. Resected specimens were evaluated pathologically with hematoxylin and eosin (H&E) staining to confirm the presence of tumor.

**Fluorescence imaging of esophageal cancer in ESD clinical specimens:** All experiments were performed in accordance with guidelines and regulations approved by the Research Ethics Committee of the University of Tokyo and registered in the UMIN Clinical Trials Registry (registration number: UMIN000012645). All methods were performed in accordance with the relevant guidelines and regulations. Specimens from esophageal cancer patients were resected during ESD. 50  $\mu$ M **EP-SiR640** in PBS (pH = 7.4) containing 0.5% DMSO as a co-solvent was applied to each specimen. Fluorescence images were captured with a Maestro<sup>TM</sup> In-Vivo Imaging System (PerkinElmer, Inc., MA, USA) equipped with an excitation filter set at 635 nm (616-661 nm) and a 675 nm emission long-path filter. Fluorescence images at 700 nm were extracted.

**Fluorescence imaging of esophageal cancer in clinical specimens resected by ESD:** The experimental protocols

and procedures were approved (No. 2014-370) by the institutional review board of the National Cancer Center, Japan. All methods were performed in accordance with the relevant guidelines and regulations. Specimens from esophageal cancer patients were resected by means of ESD. Each specimen was sprayed with 50  $\mu$ M **EP-SiR640** in PBS (pH = 7.4) containing 0.5% DMSO as a co-solvent. Fluorescence images were captured with a Discovery<sup>TM</sup> imaging system (INDEC, Inc., CA, USA) equipped with Deep Red filter set (Cy5 filter set, Ex = 630 nm, Em = 670 nm).

**Computation details:** All density functional theory (DFT) calculations were performed at the B3LYP<sup>[2-5]</sup> functional level as implemented in Gaussian 09<sup>[6]</sup>. The 6-31+G(d) basis set was used for all atoms. The number of imaginary frequencies is 0 for all structures.

## Synthesis and characterization of compounds

**Scheme 1.** Synthesis of 2,6-diMe SiR640 and Ac-2,6-diMe SiR640.

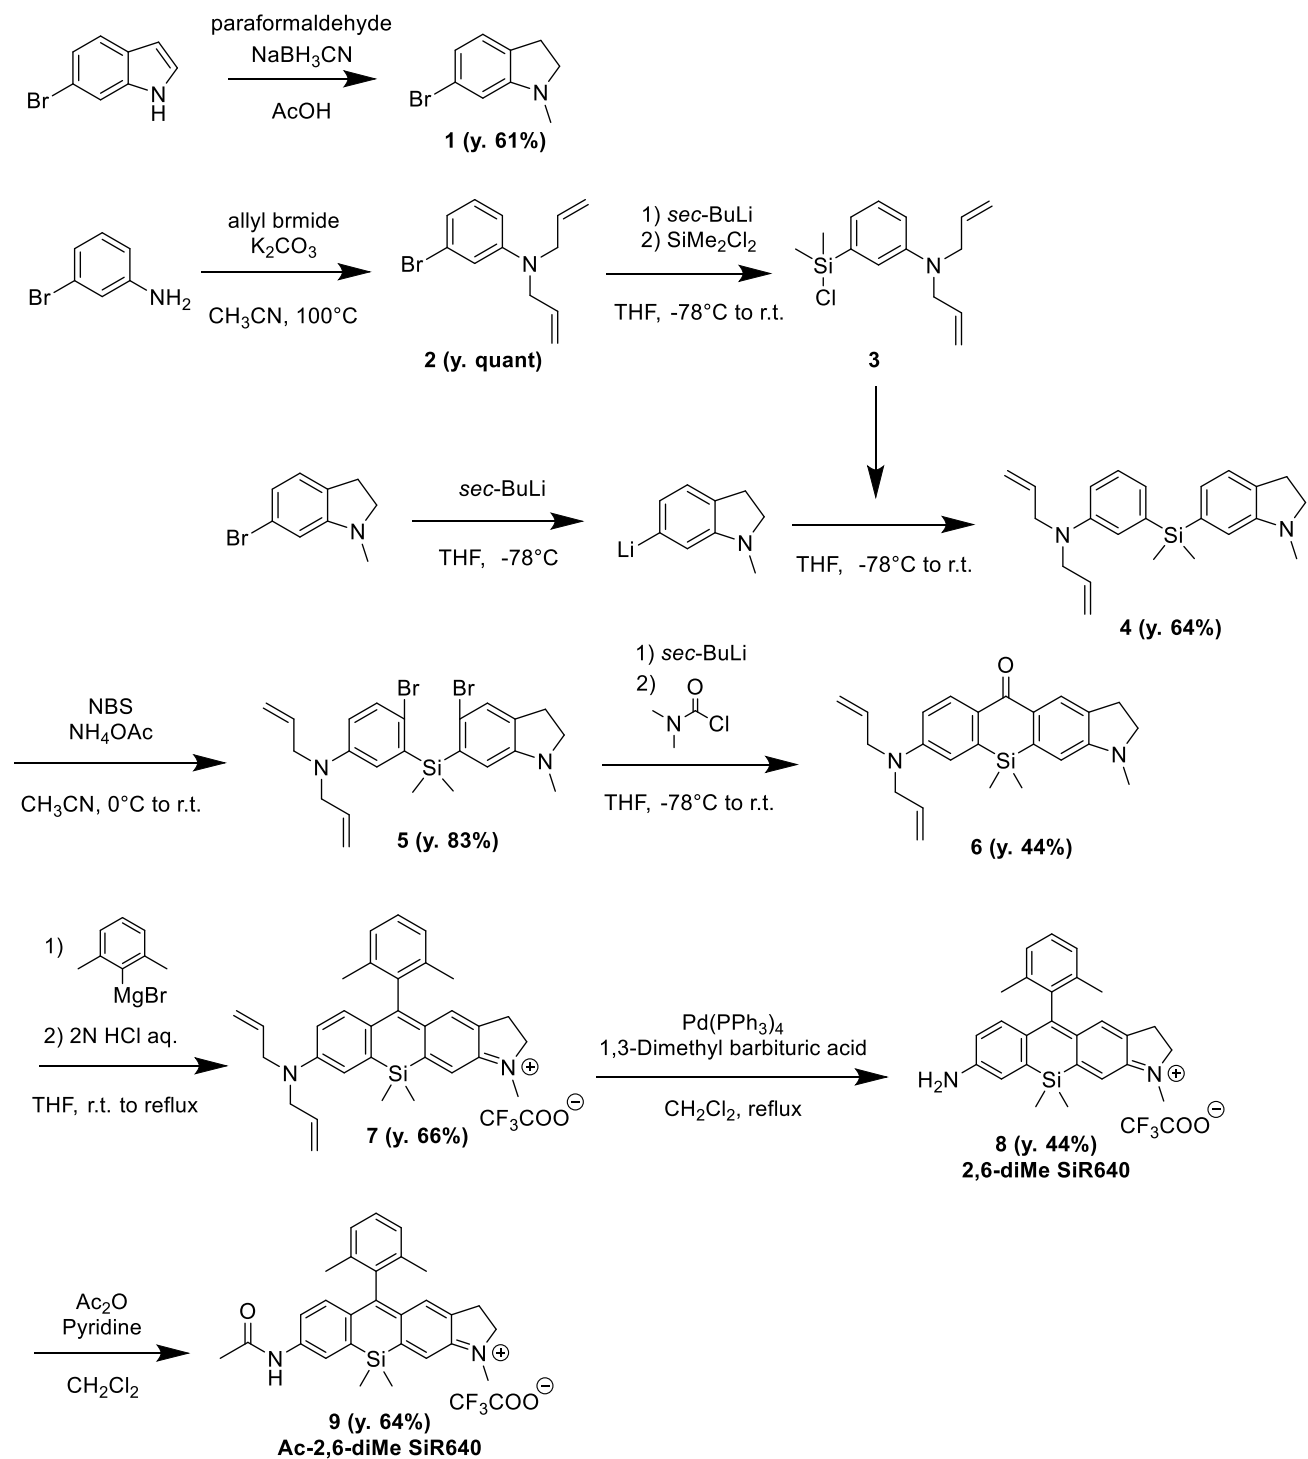

### 6-Bromo-1-methylindoline

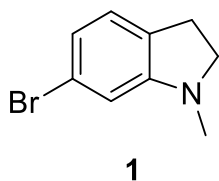

The compound was synthesized according to the literature.<sup>[7]</sup>

### 3-Bromo-*N,N*-diallylaniline

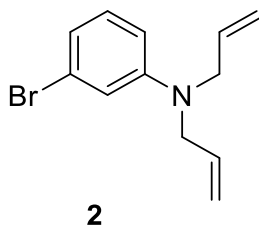

The compound was synthesized according to the literature.<sup>[8]</sup>

### *N,N*-Diallyl-3-[dimethyl(1-methylindolin-6-yl)silyl]aniline

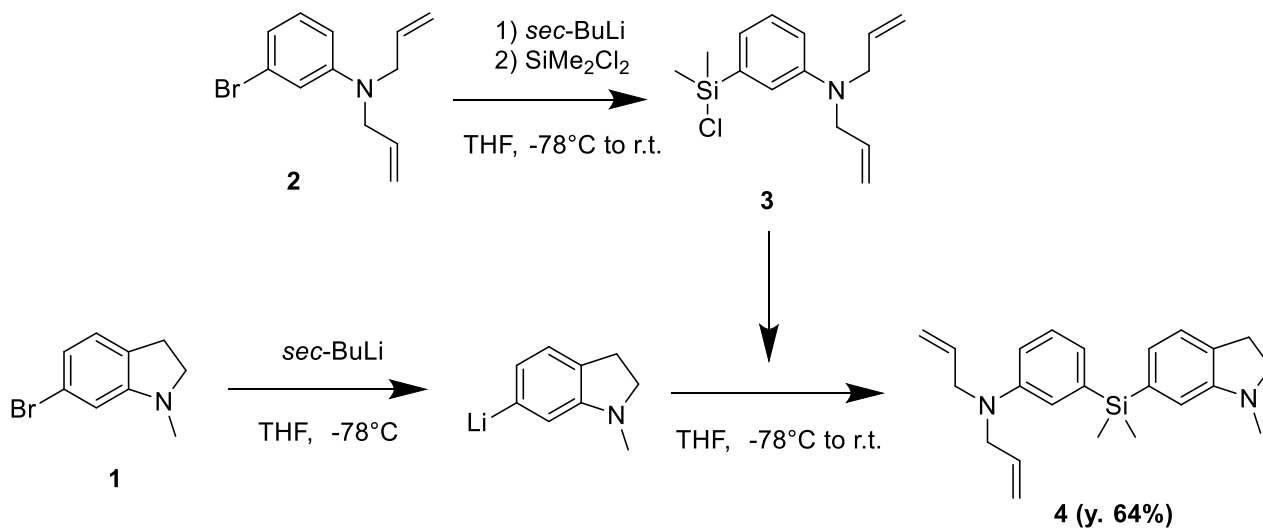

To a 100 mL well-dried flask flushed with argon, a solution of **2** (655 mg, 2.60 mmol) in 20 mL anhydrous THF

was added. The solution was cooled to  $-78^{\circ}\text{C}$ , and *sec*-BuLi (2.6 mL, 1.0 M, 2.6 mmol) was added under an argon atmosphere. The mixture was stirred at the same temperature for 15 min, then dichlorodimethylsilane (3.1 mL, 26 mmol) in 2 mL anhydrous THF was added at  $-78^{\circ}\text{C}$ . The reaction mixture was warmed to room temperature and stirred for 1 h. The solvent and the excess dichlorodimethylsilane were removed by evaporation, and compound **3** was dried *in vacuo* for 1 h. To a 100 mL well-dried flask flushed with argon, **1** (551 mg, 2.60 mmol) in 10 mL anhydrous THF was added. The solution was cooled to  $-78^{\circ}\text{C}$ , and *sec*-BuLi (2.6 mL, 1.0 M, 2.6 mmol) was added. The mixture was stirred at the same temperature for 15 min, then a solution of **3** in 5 mL anhydrous THF was added at  $-78^{\circ}\text{C}$ . The reaction mixture was warmed to room temperature and stirred for 1 h. The reaction was quenched with  $\text{H}_2\text{O}$  and the aqueous layer was extracted with  $\text{CH}_2\text{Cl}_2$ . The combined organic layers were washed with brine, dried over  $\text{Na}_2\text{SO}_4$  and evaporated to dryness. The residue was purified by column chromatography (silica gel, AcOEt/*n*-hexane) to give pure **4** (604 mg, 1.67 mmol, 64% yield).  $^1\text{H}$ -NMR (400 MHz,  $\text{CDCl}_3$ ):  $\delta$  0.53 (s, 6H), 2.76 (s, 3H), 2.95 (t,  $J = 8.2\text{Hz}$ , 2H), 3.29 (t,  $J = 8.2\text{Hz}$ , 2H), 3.91-3.92 (m, 4H), 5.13-5.20 (m, 4H), 5.81-5.90 (m, 2H), 6.67 (s, 1H), 6.72 (dd,  $J = 2.7, 8.2\text{ Hz}$ , 1H), 6.87-6.92 (m, 3H), 7.10 (d,  $J = 6.9\text{Hz}$ , 1H), 7.21 (t,  $J = 8.2\text{Hz}$ , 1H);  $^{13}\text{C}$ -NMR (100 MHz,  $\text{CDCl}_3$ ):  $\delta$  -1.98, 28.9, 36.4, 53.0, 56.1, 112.4, 113.3, 116.2, 118.3, 122.4, 124.0, 124.4, 128.6, 131.7, 134.3, 137.1, 139.2, 148.0, 152.9; HRMS ( $\text{ESI}^+$ ): Calcd for 363.2257  $[\text{M} + \text{H}]^+$ ; Found, 363.2214 (-4.3 mDa).

***N,N*-Diallyl-4-bromo-3-[(5-bromo-1-methylindolin-6-yl)dimethylsilyl]aniline**

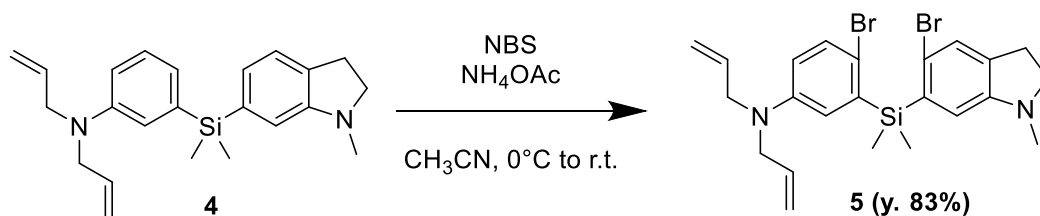

To a solution of **4** (1.76 g, 4.85 mmol) in 20 mL  $\text{CH}_3\text{CN}$ ,  $\text{NH}_4\text{OAc}$  (74.8 mg, 0.971 mmol) was added. The solution was cooled to  $0^{\circ}\text{C}$ , then NBS (*N*-bromosuccinimide) (1.73 g, 9.71 mmol) was added. The mixture was

stirred for 30 min at 0°C, then warmed to room temperature, stirred for 2 h, and diluted with sat. NaHCO<sub>3</sub> aq. The aqueous layer was extracted with CH<sub>2</sub>Cl<sub>2</sub>. The combined organic layers were washed with brine, dried over Na<sub>2</sub>SO<sub>4</sub> and evaporated to dryness. The residue was purified by column chromatography (silica gel, AcOEt/*n*-hexane) to give pure **5** (2.09 g, 4.02 mmol, 83% yield). <sup>1</sup>H-NMR (400 MHz, CD<sub>3</sub>CN): δ 0.64 (s, 6H), 2.64 (s, 3H), 2.86 (t, *J* = 8.2Hz, 2H), 3.24 (t, *J* = 8.2Hz, 2H), 3.82-3.83 (m, 4H), 4.98-5.07 (m, 4H), 5.71-5.81 (m, 2H), 6.53-6.56 (m, 2H), 6.75 (d, *J* = 3.7Hz, 1H), 7.15 (s, 1H), 7.21 (d, *J* = 8.7Hz, 1H); <sup>13</sup>C-NMR (100 MHz, CD<sub>3</sub>CN): δ -1.46, 28.0, 35.2, 53.0, 55.7, 114.8, 115.1, 115.2, 115.5, 117.1, 121.6, 128.6, 132.8, 134.1, 134.9, 136.4, 138.7, 147.0, 152.5; HRMS (ESI<sup>+</sup>): Calcd for 519.0467 [M + H]<sup>+</sup>; Found, 519.0485 (+1.8 mDa).

#### 8-(Diallylamino)-1,10,10-trimethyl-2,3-dihydro-5H-benzo[5,6]silino[3,2-f]indol-5-one

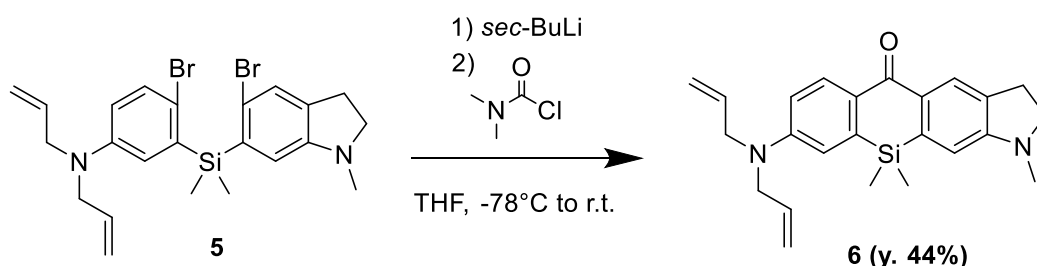

To a 100 mL well-dried flask flushed with argon, a solution of **5** (1.08 g, 2.08 mmol) in 30 mL THF was added. The solution was cooled to -78°C, and *sec*-BuLi (4.0 mL, 1.0 M, 4.0 mmol) was added under an argon atmosphere. The reaction mixture was stirred at the same temperature for 15 min, then a solution of dimethylcarbamoyl chloride (95.5 μL, 1.04 mmol) in 2 mL anhydrous THF was added at -78°C. The reaction mixture was warmed to room temperature and stirred for 30 min. The reaction was quenched with sat. NH<sub>4</sub>Cl aq. and the aqueous layer was extracted with AcOEt. The combined organic layers were washed with brine, dried over Na<sub>2</sub>SO<sub>4</sub> and evaporated to dryness. The residue was purified by column chromatography (silica gel, AcOEt/*n*-hexane) to give pure **6** (359 mg, 0.924 mmol, 45% yield). <sup>1</sup>H-NMR (400 MHz, CDCl<sub>3</sub>): δ 0.41 (s, 6H), 2.89 (s, 3H), 3.04 (t, *J* = 8.2Hz, 2H), 3.46 (t, *J* = 8.2Hz, 2H), 4.01-4.02 (m, 4H), 5.17-5.21 (m, 4H), 5.82-5.91 (m, 2H), 6.48 (s, 1H), 6.78-6.82 (m, 2H), 8.19 (s, 1H), 8.33 (d, *J* = 8.7Hz, 1H); <sup>13</sup>C-NMR (100 MHz, CDCl<sub>3</sub>): δ -1.05, 28.1, 34.7, 52.7, 54.9, 108.0, 113.5, 114.7, 114.8, 115.1, 115.2, 115.5, 117.1, 121.6, 128.6, 132.8, 134.1, 134.9, 136.4, 138.7, 147.0, 152.5; HRMS (ESI<sup>+</sup>): Calcd for 519.0467 [M + H]<sup>+</sup>; Found, 519.0485 (+1.8 mDa).

116.6, 126.1, 130.0, 131.6, 131.7, 132.2, 133.1, 140.2, 140.4, 150.1, 154.9, 185.2; HRMS (ESI<sup>+</sup>): Calcd for 389.2049 [M + H]<sup>+</sup>; Found, 389.2033 (-1.6 mDa).

***N,N*-Diallyl-2,6-diMe SiR640 (7)**

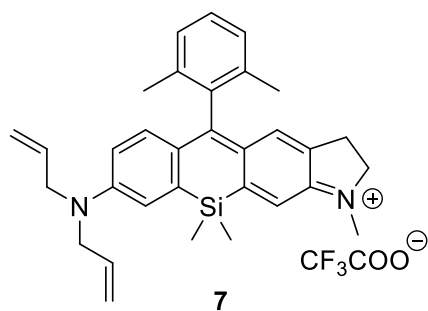

The compound was synthesized according to the literature.<sup>[9]</sup>

**2,6-diMe SiR640 (8)**

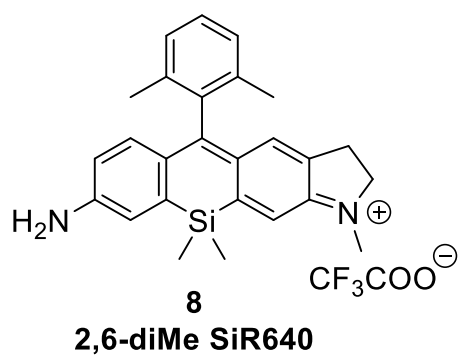

The compound was synthesized according to the literature.<sup>[9]</sup>



### Ac-2,6-diMe SiR640 (9)

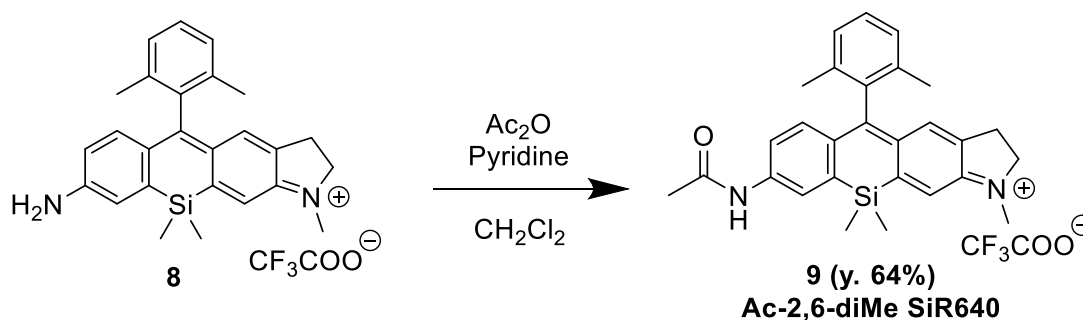

To the solution of **8** (6.6 mg, 12.9  $\mu\text{mol}$ ) in 5 mL  $\text{CH}_2\text{Cl}_2$ , acetic anhydride (157  $\mu\text{L}$ , 1.67 mmol) and pyridine (134  $\mu\text{L}$ , 1.67 mmol) were added. The mixture was stirred at r.t. for 24 h, then evaporated to dryness. The residue was taken up in  $\text{H}_2\text{O}$  and extracted with  $\text{CH}_2\text{Cl}_2$ . The combined organic layers were washed with brine, dried over  $\text{Na}_2\text{SO}_4$  and evaporated to dryness. The residue was purified by HPLC (eluent: A:  $\text{H}_2\text{O}$ , 0.1% TFA (v/v), B:  $\text{CH}_3\text{CN}/\text{H}_2\text{O}$  = 80/20, 0.1% TFA (v/v); gradient: A/B = 80/20 to 0/100, 25 min) to give **Ac-2,6-diMe SiR640 (9)** (4.6 mg, 8.32  $\mu\text{mol}$ , 64% yield).  $^1\text{H-NMR}$  (400 MHz,  $\text{CD}_3\text{OD}$ ):  $\delta$  0.58 (s, 6H), 1.96 (s, 6H), 2.14 (s, 3H), 3.01 (t,  $J$  = 6.4 Hz, 2H), 3.51 (s, 3H), 4.09 (t,  $J$  = 6.4 Hz, 2H), 6.85 (s, 1H), 6.96 (d,  $J$  = 9.2 Hz, 1H), 7.23 (d,  $J$  = 7.3 Hz, 2H), 7.35 (t,  $J$  = 7.3 Hz, 1H), 7.49 (dd,  $J$  = 2.3, 9.2 Hz, 1H), 7.57 (s, 1H), 8.12 (d,  $J$  = 2.3 Hz, 1H); HRMS ( $\text{ESI}^+$ ): Calcd for 439.2206  $[\text{M}]^+$ ; Found, 439.2192 (-1.4 mDa). The HPLC chromatogram after purification is shown below (eluent: A:  $\text{H}_2\text{O}$ , 0.1% TFA (v/v), B:  $\text{CH}_3\text{CN}/\text{H}_2\text{O}$  = 80/20 0.1% TFA (v/v); gradient: A/B = 80/20 to 0/100, 25 min; flow rate: 1.0 mL/min; detection: absorbance at 500 nm).

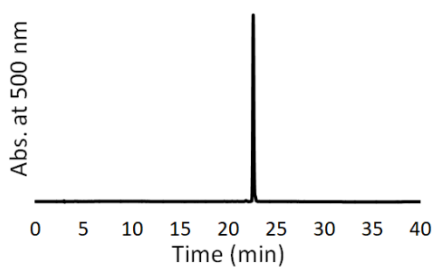

**Scheme 2.** Synthesis of 2,6-diMe JuloSiR and Ac-2,6-diMe JuloSiR.

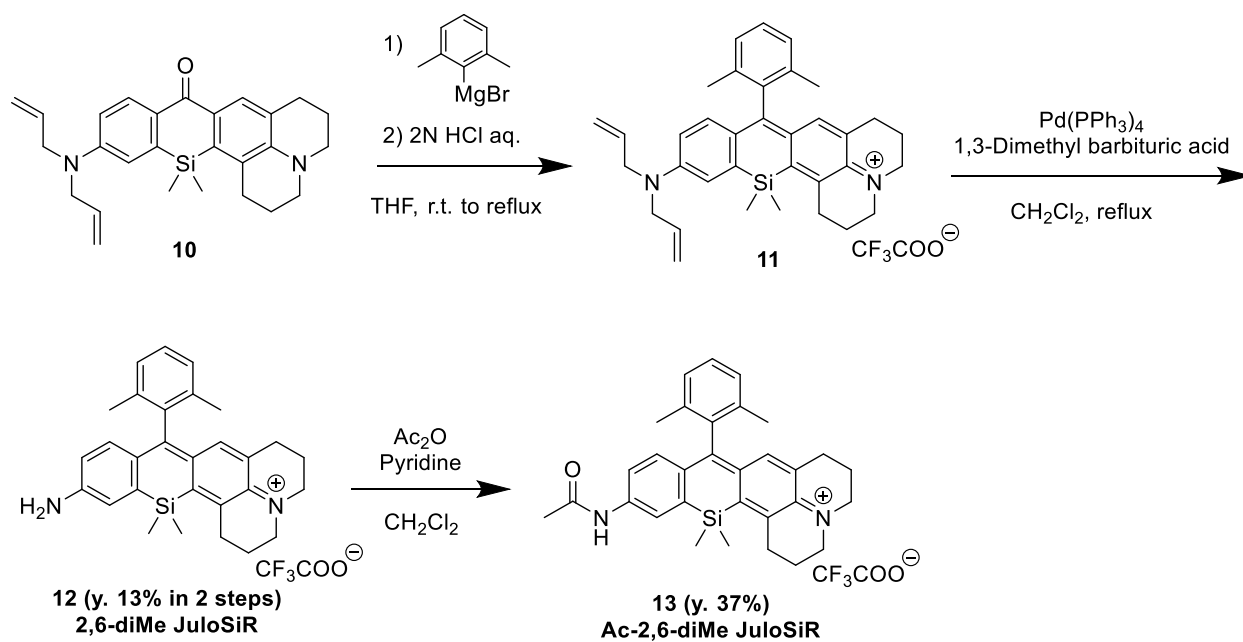

**12-(Diallylamino)-14,14-dimethyl-1,2,3,5,6,7-hexahydro-1H,9H-benzo[5,6]silino[2,3-f]pyrido-[3,2,1-ij]quinolin-9-one**

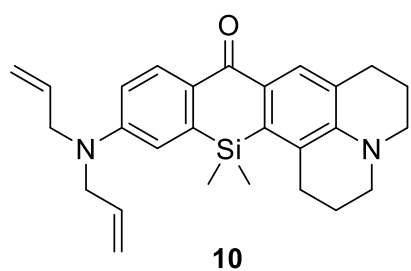

The compound was synthesized according to the literature.<sup>[10]</sup>

## 2,6-diMe JuloSiR (12)

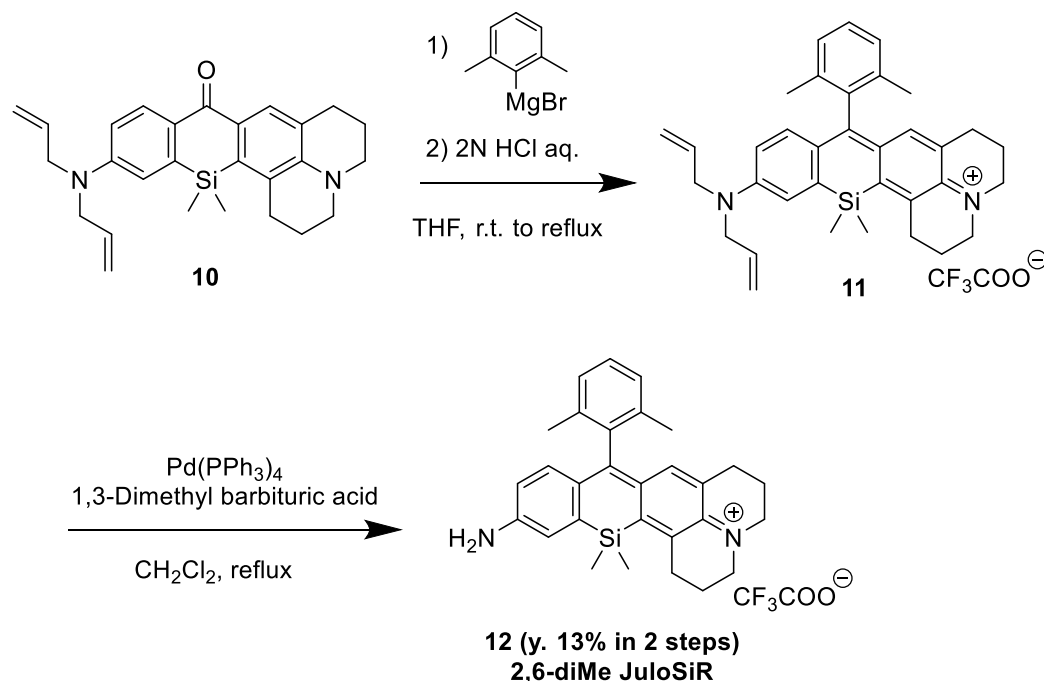

To a 50 mL well-dried flask flushed with argon, a solution of **10** (60 mg, 0.140 mmol) in 15 mL anhydrous THF was added. Then, THF solution of 2,6-dimethylphenylmagnesium bromide (1.4 mL, 1.0 M, 1.4 mmol) was added and the mixture was refluxed at 85°C for 3 h under an argon atmosphere. Another portion of Grignard reagent was further added two times (1.0 M THF solution of 2,6-dimethylphenylmagnesium bromide; 1.4 mL, 1.4 mmol at 3 h and 2.8 mL, 2.8 mmol at 7 h after the first Grignard reagent was added) and the mixture was refluxed at 85°C for 6 h. It was allowed to cool to room temperature, and 2N HCl aq. was added. The reaction mixture was diluted with H<sub>2</sub>O, and the aqueous layer was extracted with CH<sub>2</sub>Cl<sub>2</sub>. The combined organic layers were washed with brine, dried over Na<sub>2</sub>SO<sub>4</sub> and evaporated to dryness. The residue was purified with reversed-phase MPLC (CH<sub>3</sub>CN, 0.1% TFA (v/v) /H<sub>2</sub>O, 0.1% TFA (v/v)). Then, the compound was lyophilized. The residue (crude **11**) was dissolved in 8 mL deoxidized CH<sub>2</sub>Cl<sub>2</sub>, and 1,3-dimethylbarbituric acid (28.5 mg, 0.182 mmol) and Pd(PPh<sub>3</sub>)<sub>4</sub> (28.5 mg, 60.5 μmol) were added. The reaction mixture was refluxed at 40°C for 16.5 h under an argon atmosphere, then cooled to room temperature, and diluted with H<sub>2</sub>O. The aqueous layer was extracted with CH<sub>2</sub>Cl<sub>2</sub>. The combined organic layers were washed with brine, dried over Na<sub>2</sub>SO<sub>4</sub> and evaporated to dryness. The residue was purified by HPLC (eluent:

A: H<sub>2</sub>O, 0.1% TFA (v/v), B: CH<sub>3</sub>CN/H<sub>2</sub>O = 80/20, 0.1% TFA (v/v); gradient: A/B = 70/30 to 0/100, 25 min), and the partially purified compound was lyophilized. The residue was further purified by HPLC (eluent: C: H<sub>2</sub>O, 100 mM TEAA, D: CH<sub>3</sub>CN/H<sub>2</sub>O (100 mM TEAA) = 80/20; gradient: C/D = 70/30 to 0/100, 25 min), and again lyophilized. The residue was further purified by HPLC (eluent: A: H<sub>2</sub>O, 0.1% TFA (v/v), B: CH<sub>3</sub>CN/H<sub>2</sub>O = 80/20, 0.1% TFA (v/v); gradient: A/B = 70/30 to 0/100, 30 min) to give **2,6-diMe JuloSiR (12)** (9.8 mg, 17.8 μmol, 13% yield). <sup>1</sup>H-NMR (400 MHz, CD<sub>3</sub>OD): δ 0.60 (s, 6H), 1.86-1.98 (m, 8H), 2.05-2.11 (m, 2H), 2.46 (t, *J* = 6.0 Hz, 2H), 3.02 (t, *J* = 6.0 Hz, 2H), 3.56-3.62 (m, 4H), 6.48 (dd, *J* = 2.3, 9.2 Hz, 1H), 6.75 (s, 1H), 6.80 (d, *J* = 9.2 Hz, 1H), 7.10 (d, *J* = 2.3 Hz, 1H), 7.18 (d, *J* = 7.8 Hz, 2H), 7.31 (t, *J* = 7.8 Hz, 1H); <sup>13</sup>C-NMR (100 MHz, CD<sub>3</sub>OD): δ -2.32, 18.4, 20.2, 20.6, 27.1, 28.7, 51.2, 51.9, 115.4, 121.6, 124.7, 126.5, 126.6, 127.2, 128.3, 133.2, 135.4, 138.1, 138.8, 139.1, 141.8, 147.5, 151.4, 155.8, 167.7; HRMS (ESI<sup>+</sup>): Calcd for 437.2413 [M]<sup>+</sup>; Found, 437.2395 (-1.8 mDa).

#### Ac-2,6-diMe JuloSiR (13)

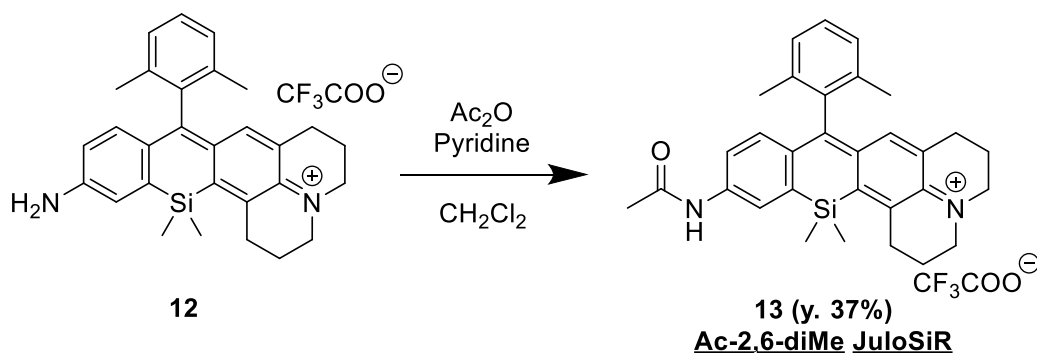

To a solution of **12** (5.7 mg, 10.4 μmol) in 5 mL CH<sub>2</sub>Cl<sub>2</sub>, acetic anhydride (123 μL, 1.30 mmol) and pyridine (105 μL, 1.30 mmol) were added. The mixture was stirred at r.t. for 21 h, then evaporated to dryness and H<sub>2</sub>O was added to the residue. The aqueous layer was extracted with CH<sub>2</sub>Cl<sub>2</sub>. The combined organic layers were washed with brine, dried over Na<sub>2</sub>SO<sub>4</sub> and evaporated to dryness. The residue was purified by HPLC (eluent: A: H<sub>2</sub>O, 0.1% TFA (v/v), B: CH<sub>3</sub>CN/H<sub>2</sub>O = 80/20, 0.1% TFA (v/v); gradient: A/B = 80/20 to 0/100, 25 min) to give pure **Ac-2,6-diMe JuloSiR (13)** (2.3 mg, 3.88 μmol, 37% yield). <sup>1</sup>H-NMR (400 MHz, CD<sub>3</sub>OD): δ 0.65 (s, 6H), 1.94-1.99 (m, 8H),

2.10-2.18 (m, 5H), 2.52 (t,  $J = 6.0$  Hz, 2H), 3.09 (t,  $J = 6.0$  Hz, 2H), 3.74-3.79 (m, 4H), 4.95, 6.89-6.91 (m, 2H), 7.22 (d,  $J = 7.8$  Hz, 2H), 7.35 (t,  $J = 7.8$  Hz, 1H) 7.47 (dd,  $J = 2.3, 9.2$  Hz, 1H), 8.13 (d,  $J = 2.3$  Hz, 1H); HRMS (ESI<sup>+</sup>): Calcd for 479.2519 [M]<sup>+</sup>; Found, 479.2479 (-4.0 mDa). The HPLC chromatogram after purification is shown below (eluent: A: H<sub>2</sub>O, 0.1% TFA (v/v), B: CH<sub>3</sub>CN/H<sub>2</sub>O = 80/20, 0.1% TFA (v/v); gradient: A/B = 80/20 to 0/100, 25 min; flow rate: 1.0 mL/min; detection: absorbance at 500 nm).

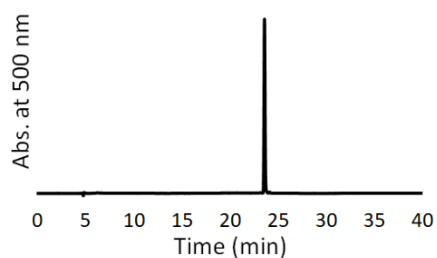

**Scheme 3.** Synthesis of 2,6-diMe QuinoSiR and Ac-2,6-diMe QuinoSiR.

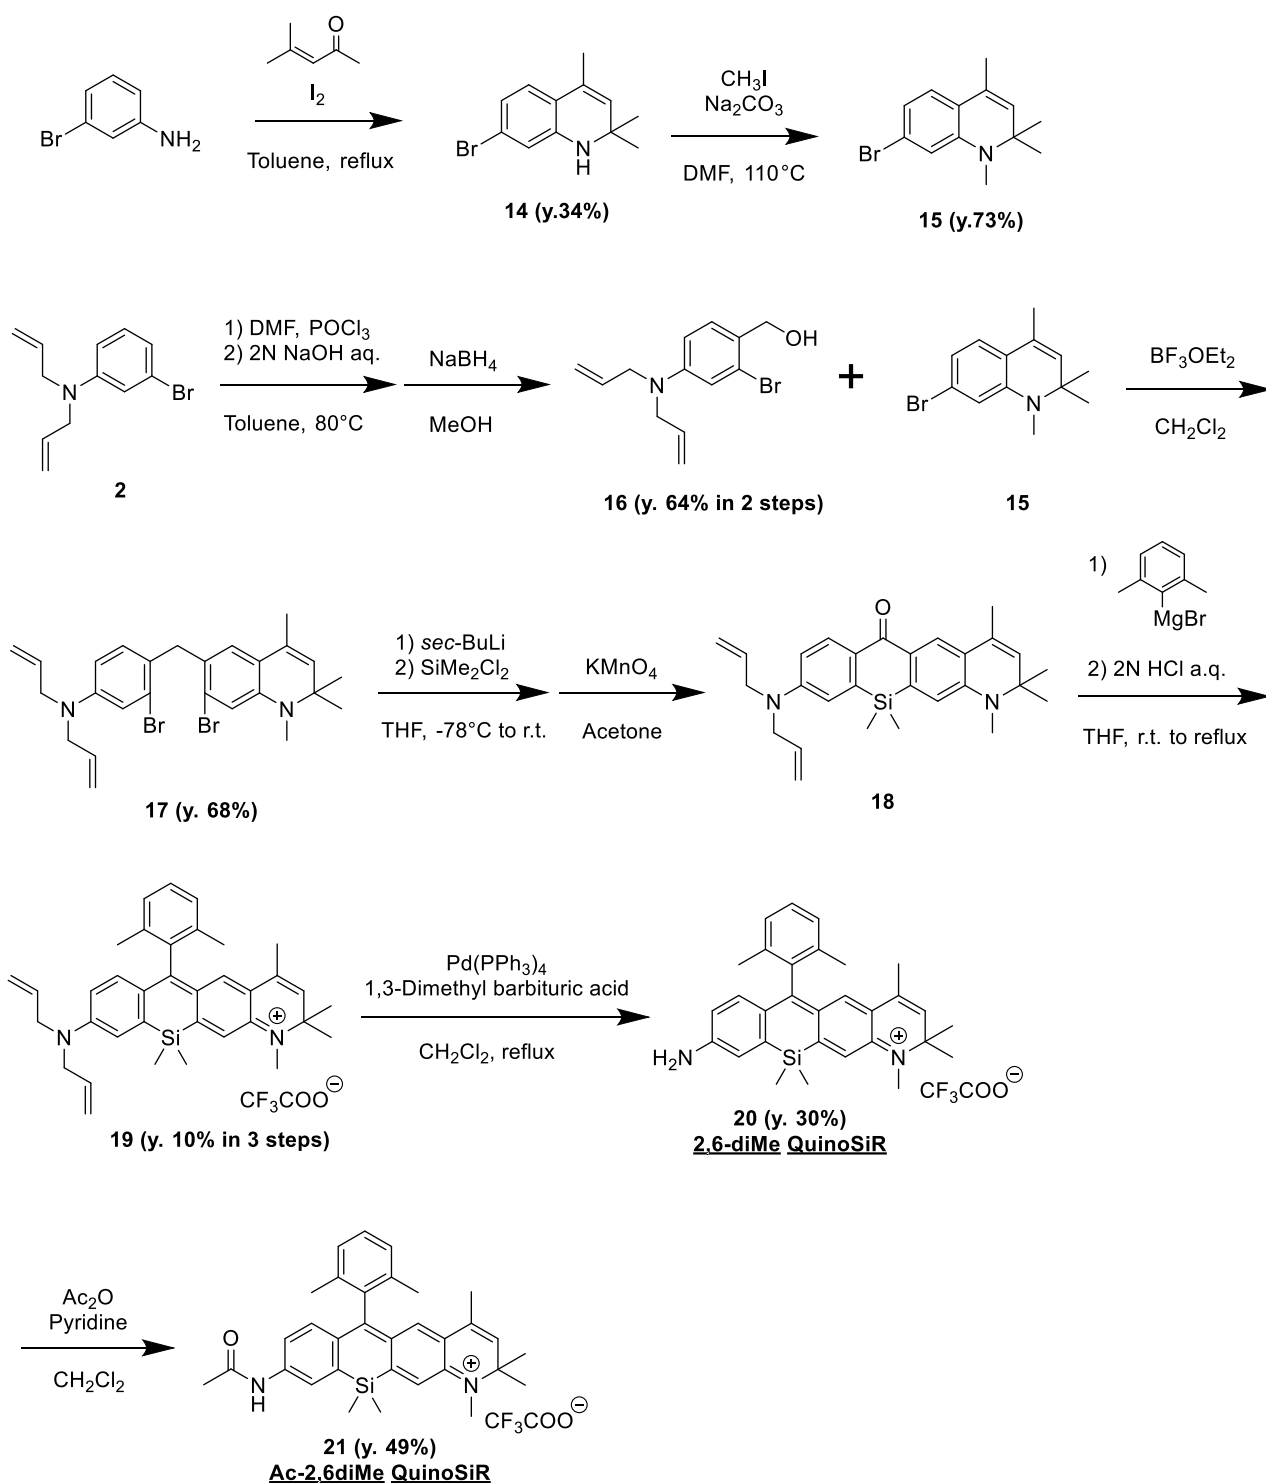

**7-Bromo-2,2,4-trimethyl-1,2-dihydroquinoline**

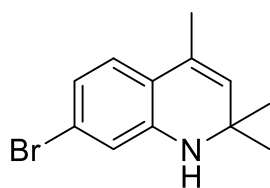

**14**

The compound was synthesized according to the literature.<sup>[7]</sup>

**7-Bromo-1,2,2,4-tetramethyl-1,2-dihydroquinoline**

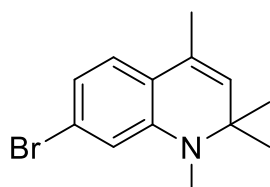

**15**

The compound was synthesized according to the literature.<sup>[7]</sup>

**2-Bromo-4-(diallylamino)phenyl]methanol**

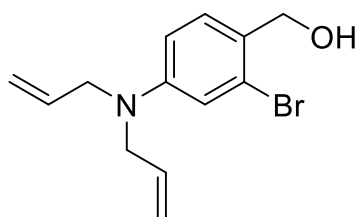

**16**

The compound was synthesized according to the literature.<sup>[9]</sup>

***N,N*-Diallyl-3-bromo-4-[(7-bromo-1,2,2,4-tetramethyl-1,2-dihydroquinolin-6-yl)methyl]aniline**

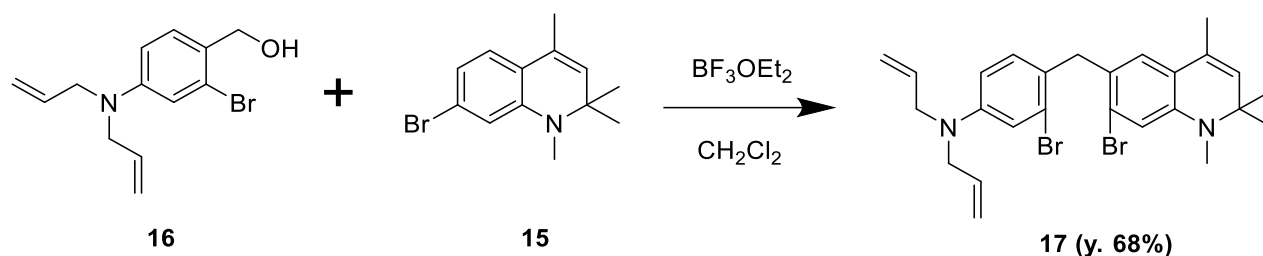

To a solution of **16** (2.14 g, 7.57 mmol) and **15** (2.02 g, 7.57 mmol) in 100 mL  $\text{CH}_2\text{Cl}_2$ ,  $\text{BF}_3 \cdot \text{OEt}_2$  (1.90 mL, 15.1 mmol) was added and the mixture was stirred at r.t. for 21 h. The reaction mixture was diluted with  $\text{H}_2\text{O}$  and the aqueous layer was extracted with  $\text{CH}_2\text{Cl}_2$ . The combined organic layers were washed with brine, dried over  $\text{Na}_2\text{SO}_4$  and evaporated to dryness. The residue was purified by column chromatography (silica gel,  $\text{AcOEt}/n$ -hexane) to give **17** (2.72 g, 5.13 mmol, 68% yield).  $^1\text{H-NMR}$  (400MHz,  $\text{CDCl}_3$ ):  $\delta$  1.28 (s, 6H), 1.85 (d,  $J = 1.4\text{Hz}$ , 3H), 2.76 (s, 3H), 3.85-3.86 (m, 4H), 3.96 (s, 2H), 5.12-5.17 (m, 4H), 5.28 (d,  $J = 1.4\text{Hz}$ , 1H), 5.76-5.86 (m, 2H), 6.51 (dd,  $J = 2.7, 8.7\text{Hz}$ , 1H), 6.69 (s, 1H), 6.74-6.77 (m, 2H), 6.90 (d,  $J = 2.7\text{Hz}$ , 1H);  $^{13}\text{C-NMR}$  (100 MHz,  $\text{CDCl}_3$ ):  $\delta$  18.5, 27.3, 30.8, 40.0, 52.9, 56.5, 111.7, 114.4, 116.0, 116.3, 122.9, 124.9, 125.4, 125.7, 126.5, 127.1, 127.7, 130.4, 130.6, 133.6, 144.8, 148.1; HRMS ( $\text{ESI}^+$ ): Calcd for 529.0854  $[\text{M} + \text{H}]^+$ ; Found, 529.0859 (+0.5 mDa).



***N,N*-Diallyl-2,6-diMe QuinoSiR (19)**

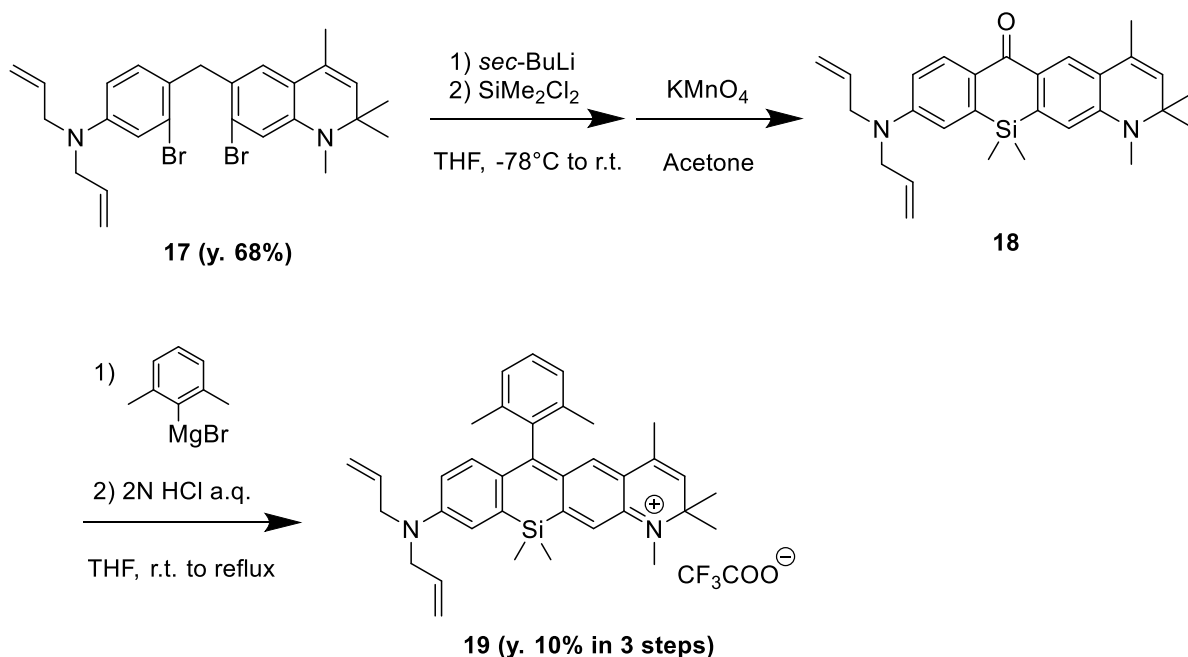

To a 50 mL well-dried flask flushed with argon, a solution of **17** (542 mg, 1.02 mmol) in 12 mL anhydrous THF was added. The solution was cooled to -78°C, and *sec*-BuLi (2.1 mL, 1.0 M, 2.1 mmol) was added under an argon atmosphere. The reaction mixture was stirred at the same temperature for 15 min, then dichlorodimethylsilane (244 μL, 2.04 mmol) in 3 mL anhydrous THF was added. The reaction mixture was warmed to room temperature and stirred for 2 h. The reaction was quenched with water and the aqueous layer was extracted with CH<sub>2</sub>Cl<sub>2</sub>. The combined organic layers were washed with brine, dried over Na<sub>2</sub>SO<sub>4</sub> and evaporated to dryness. The residue was dissolved in 30 mL acetone and the solution was cooled to 0°C. KMnO<sub>4</sub> (646 mg, 4.09 mmol) was added in small portions over 2 h with stirring at the same temperature. Stirring was continued at the same temperature for 1 h, then the mixture was diluted with CH<sub>2</sub>Cl<sub>2</sub>, and filtered through a Celite filter. The filtrate was evaporated to dryness. The residue was purified by column chromatography (silica gel, AcOEt/*n*-hexane) and GPC to afford crude **18**, which was dissolved in 10 mL anhydrous THF. To this solution was added a THF solution of 2,6-dimethylphenylmagnesium bromide (2.2 mL, 1.0 M, 2.2 mmol), and the mixture was refluxed at 85°C for 2 h under an argon atmosphere. Another portion of Grignard reagent (1.0 M THF solution of

2,6-dimethylphenylmagnesium bromide; 2.2 mL, 2.2 mmol) was further added and the mixture was refluxed at 85°C for 5 h. It was then cooled to room temperature, and 2 N HCl aq. was added. The resulting mixture was diluted with H<sub>2</sub>O, and the aqueous layer was extracted with CH<sub>2</sub>Cl<sub>2</sub>. The combined organic layers were washed with brine, dried over Na<sub>2</sub>SO<sub>4</sub> and evaporated to dryness. The residue was purified by reversed-phase MPLC (CH<sub>3</sub>CN, 0.1% TFA (v/v) /H<sub>2</sub>O, 0.1% TFA (v/v)), and the product was lyophilized. The resulting partially purified compound was further purified by HPLC (eluent: A: H<sub>2</sub>O, 0.1% TFA (v/v), B: CH<sub>3</sub>CN/H<sub>2</sub>O = 80/20, 0.1% TFA (v/v); gradient: A/B = 60/40 to 0/100, 15 min) to give *N,N*-diallyl-2,6-diMe QuinoSiR (**19**) (68.6 mg, 0.106 mmol, 10% in 3 steps). <sup>1</sup>H-NMR (400 MHz, CD<sub>3</sub>CN): δ 0.53 (s, 6H), 1.43 (s, 6H), 1.47 (d, *J* = 1.4 Hz, 3H), 1.94 (s, 6H), 3.27 (s, 3H), 4.17-4.18 (m, 4H), 5.15-5.23 (m, 4H), 5.50-5.51 (m, 1H), 5.83-5.92 (m, 2H), 6.64-6.67 (m, 2H), 6.98 (d, *J* = 9.6 Hz, 1H), 7.19-7.22 (m, 4H), 7.33 (t, *J* = 7.3 Hz, 1H); <sup>13</sup>C-NMR (100 MHz, CD<sub>3</sub>CN): δ -2.24, 16.6, 18.9, 28.0, 33.2, 53.1, 61.0, 114.5, 117.0, 120.9, 121.0, 123.4, 125.4, 127.2, 127.3, 127.5, 128.6, 131.1, 131.2, 131.9, 135.5, 138.4, 138.9, 146.4, 151.5, 151.6, 153.0, 168.4; HRMS (ESI<sup>+</sup>): Calcd for 531.3196 [M]<sup>+</sup>; Found, 531.3189 (-0.7 mDa).

#### 2,6-diMe QuinoSiR (**20**)

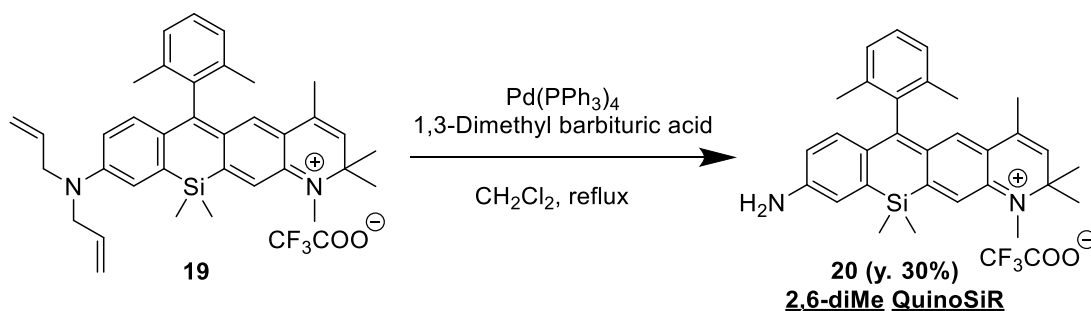

To a solution of **19** (68.6 mg, 0.106 mmol) in 15 mL deoxidized CH<sub>2</sub>Cl<sub>2</sub>, 1,3-dimethylbarbituric acid (61.5 mg, 0.394 mmol) and Pd(PPh<sub>3</sub>)<sub>4</sub> (151 mg, 0.138 mmol) were added. The reaction mixture was refluxed at 40°C for 21 h under an argon atmosphere, then cooled to room temperature, and diluted with H<sub>2</sub>O. The aqueous layer was extracted with CH<sub>2</sub>Cl<sub>2</sub>. The combined organic layers were washed with brine, dried over Na<sub>2</sub>SO<sub>4</sub> and evaporated to

dryness. The residue was purified by reversed-phase MPLC (CH<sub>3</sub>CN, 0.1% TFA (v/v) /H<sub>2</sub>O, 0.1% TFA (v/v)). The product was lyophilized and further purified by HPLC (eluent: A: H<sub>2</sub>O, 0.1% TFA (v/v), B: CH<sub>3</sub>CN/H<sub>2</sub>O = 80/20, 0.1% TFA (v/v); gradient, A/B = 70/30 to 0/100, 25 min) to give **2,6-diMe QuinoSiR (20)** (17.9 mg, 31.7 μmol, 30% yield). <sup>1</sup>H-NMR (400 MHz, CD<sub>3</sub>CN): δ 0.51 (s, 6H), 1.43 (s, 6H), 1.47 (s, 3H), 1.94 (s, 6H), 3.26 (s, 3H), 5.49 (s, 1H), 6.58 (d, *J* = 9.2 Hz, 1H), 6.66 (s, 1H), 6.97 (d, *J* = 9.2 Hz, 1H), 7.17-7.22 (m, 4H), 7.32 (t, *J* = 7.3 Hz, 1H); <sup>13</sup>C-NMR (100 MHz, CD<sub>3</sub>CN): δ -0.24, 16.6, 18.8, 28.0, 33.1, 61.0, 116.0, 120.9, 122.9, 123.3, 125.4, 127.0, 127.4, 127.5, 128.6, 131.1, 131.2, 135.5, 138.4, 140.1, 147.6, 151.2, 151.5, 155.6, 169.0; HRMS (ESI<sup>+</sup>): Calcd for 451.2570 [M]<sup>+</sup>; Found, 451.2570 (+0.0 mDa).

#### Ac-2,6-diMe QuinoSiR (21)

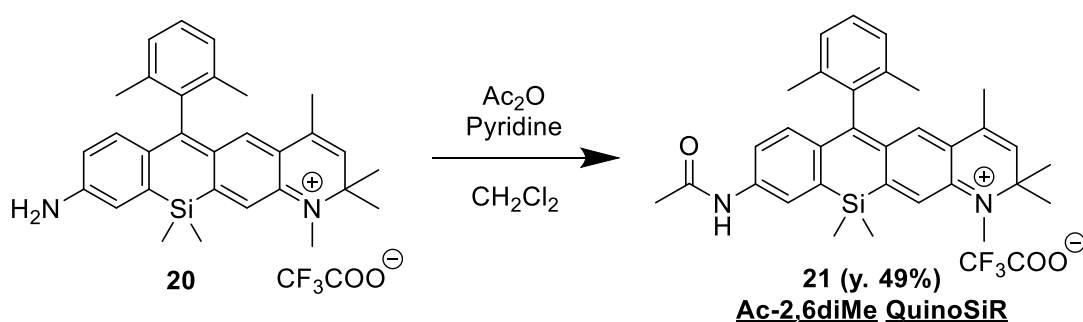

To a solution of **20** (8.0 mg, 14.2 μmol) in 5 mL CH<sub>2</sub>Cl<sub>2</sub>, acetic anhydride (134 μL, 1.42 mmol) and pyridine (114 μL, 1.42 mmol) were added and the mixture was stirred at r.t. for 14 h. The reaction mixture was evaporated to dryness and H<sub>2</sub>O was added to the residue. The aqueous layer was extracted with CH<sub>2</sub>Cl<sub>2</sub>. The combined organic layers were washed with brine, dried over Na<sub>2</sub>SO<sub>4</sub> and evaporated to dryness. The residue was purified by HPLC (eluent: A: H<sub>2</sub>O, 0.1% TFA (v/v), B: CH<sub>3</sub>CN/H<sub>2</sub>O = 80/20, 0.1% TFA (v/v); gradient: A/B = 80/20 to 0/100, 25 min) to give **Ac-2,6-diMe QuinoSiR (21)** (4.2 mg, 6.92 μmol, 49% yield). <sup>1</sup>H-NMR (400 MHz, CD<sub>3</sub>OD): δ 0.60 (s, 6H), 1.56-1.57 (m, 9H), 1.97 (s, 6H), 2.16 (s, 3H), 3.59 (s, 3H), 5.78 (s, 1H), 6.82 (s, 1H), 7.07 (d, *J* = 8.7 Hz, 1H), 7.26 (d, *J* = 7.3 Hz, 2H), 7.38 (t, *J* = 7.3 Hz, 1H), 7.53-7.56 (m, 2H), 8.15 (d, *J* = 2.3, 1H); HRMS (ESI<sup>+</sup>): Calcd for 493.2675 [M]<sup>+</sup>; Found, 493.2657 (-1.8 mDa). The HPLC chromatogram after purification is shown below (eluent:

A: H<sub>2</sub>O, 0.1% TFA (v/v), B: CH<sub>3</sub>CN/H<sub>2</sub>O = 80/20, 0.1% TFA (v/v); gradient: A/B = 80/20 to 0/100, 25 min; flow rate: 1.0 mL/min; detection: absorbance at 550 nm).

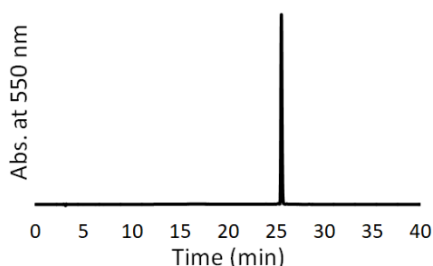

### General procedure for peptide synthesis (compounds 22-24)

All peptides were synthesized by the standard Fmoc solid-phase method, using 2-chlorotrityl chloride resin (1.47 mmol/g, 100-200 mesh, 1% DVB). Details are as follows. Coupling cycles: 4 equivalents of Fmoc-amino acid or Boc-amino acid and 4 equivalents of HATU were dissolved in DMF and 8 equivalents of DIEA was added to the mixture. The solution was added to the resin bearing *N*-deprotected peptides, and the resin was shaken for 40 min. Fmoc deprotection cycles: Fmoc deprotection was performed by adding 40% piperidine (v/v) in DMF to the resin and shaking for 12 min. Cleavage: Cleavage of peptides from the resin was done by shaking the resin in the mixture of 20% HFIP (v/v) in CH<sub>2</sub>Cl<sub>2</sub> for 30 min. The resin was removed by filtration and the combined filtrate with toluene as an azeotropic agent was evaporated to dryness.

#### Boc-Glu(*O*tBu)-Pro-OH (22)

HRMS (ESI): Calcd for 399.2131 [M - H]<sup>-</sup>; Found, 399.2113 (-1.8 mDa).

#### Boc-Asp(*O*tBu)-Pro-OH (23)

HRMS (ESI): Calcd for 385.1975 [M - H]<sup>-</sup>; Found, 385.1979 (+0.4 mDa).

#### Boc-Ser(*O*tBu)-Pro-OH (24)

HRMS (ESI<sup>+</sup>): Calcd for 357.2026 [M - H]<sup>+</sup>; Found, 357.2029 (+0.3 mDa).

#### General procedure for synthesis of compounds 25-29

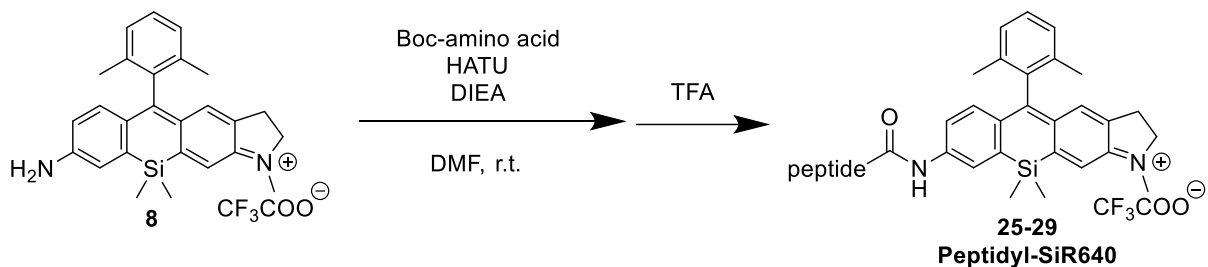

Boc-Gly-Pro-OH and Boc-Leu-OH were purchased from Watanabe Chemical Industry and used without further purification. Other Boc-amino acids were prepared by the standard Fmoc solid-phase method as described above. To a solution of **8** (1 eq.) in DMF, Boc-amino acid (7~9 eq.), HATU (6~8 eq.) and DIEA (12~15 eq.) were added. The mixture was stirred at r.t. overnight, then evaporated to dryness and H<sub>2</sub>O was added to the residue. The aqueous layer was extracted with CH<sub>2</sub>Cl<sub>2</sub>. The combined organic layers were washed with brine, dried over Na<sub>2</sub>SO<sub>4</sub> and evaporated to dryness. The residue was dissolved in 1.5 mL TFA and the solution was stirred at r.t. for 30 min, then evaporated to dryness. The resulting product was purified by HPLC (eluent: A: H<sub>2</sub>O, 0.1% TFA (v/v), B: CH<sub>3</sub>CN/H<sub>2</sub>O = 80/20, 0.1% TFA (v/v); gradient: A/B = 80/20 to 0/100, 25 min) to give pure compounds (**25-29**).

### Leu-SiR640 (25)

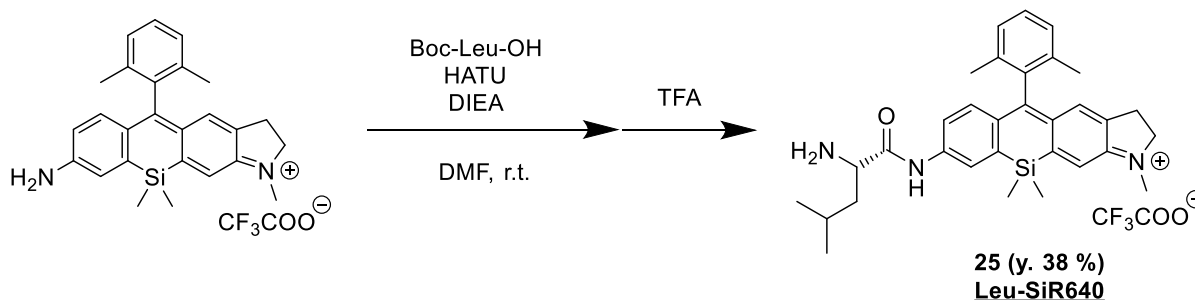

To a solution of **8** (8.1 mg, 15.9  $\mu$ mol) in 10 mL DMF, Boc-Leu-OH (34.5 mg, 0.139 mmol), HATU (46.5 mg, 0.122 mmol) and DIEA (39.8  $\mu$ L, 0.234 mmol) were added and the mixture was stirred at r.t. for 18.5 h. The reaction mixture was evaporated to dryness and H<sub>2</sub>O was added to it. The aqueous layer was extracted with CH<sub>2</sub>Cl<sub>2</sub>. The combined organic layers were washed with brine, dried over Na<sub>2</sub>SO<sub>4</sub> and evaporated to dryness. The residue was dissolved in 1.5 mL TFA and the solution was stirred at r.t. for 30 min. The reaction mixture was evaporated to dryness and the residue was purified by HPLC (eluent: A: H<sub>2</sub>O, 0.1% TFA (v/v), B: CH<sub>3</sub>CN/H<sub>2</sub>O = 80/20, 0.1% TFA (v/v); gradient: A/B = 80/20 to 0/100, 25 min) to give **Leu-SiR640 (25)** (3.8 mg, 6.09  $\mu$ mol, 38% yield). <sup>1</sup>H-NMR (400 MHz, CD<sub>3</sub>OD):  $\delta$  0.59 (s, 6H), 1.01 (d,  $J$  = 6.0 Hz, 6H), 1.68-1.84 (m, 3H), 1.96 (s, 6H), 3.02 (t,  $J$  = 6.4 Hz, 2H), 3.53 (s, 3H), 4.04 (t,  $J$  = 7.3 Hz, 1H), 4.11 (t,  $J$  = 6.4 Hz, 2H), 6.86 (s, 1H), 7.00 (d,  $J$  = 9.2 Hz, 1H), 7.24 (d,  $J$  = 7.3 Hz, 2H), 7.36 (t,  $J$  = 7.3 Hz, 1H), 7.60-7.63 (m, 2H), 8.13 (d,  $J$  = 2.3 Hz, 1H); HRMS (ESI<sup>+</sup>): Calcd for 510.2941 [M]<sup>+</sup>; Found, 510.2929 (-1.2 mDa). The HPLC chromatogram after purification is shown below (eluent: A: H<sub>2</sub>O, 0.1% TFA (v/v), B: CH<sub>3</sub>CN/H<sub>2</sub>O = 80/20, 0.1% TFA (v/v); gradient: A/B = 80/20 to 0/100, 25 min; flow rate: 1.0 mL/min; detection: absorbance at 500 nm).

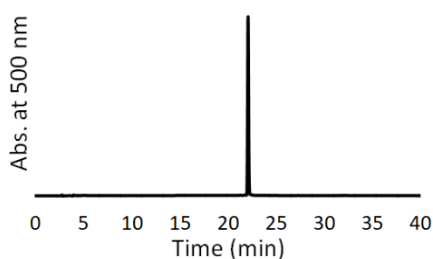

### Gly-Pro-SiR640 (**26**)

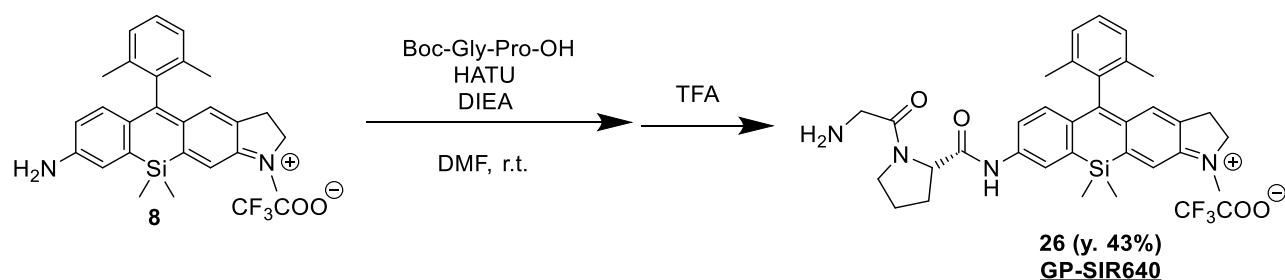

To a solution of **8** (7.4 mg, 14.5  $\mu\text{mol}$ ) in 10 mL DMF, Boc-Gly-Pro-OH (34.4 mg, 0.127 mmol), HATU (42.5 mg, 0.112 mmol) and DIEA (36.4  $\mu\text{L}$ , 0.214 mmol) were added and the mixture was stirred at r.t. for 21 h. The reaction mixture was evaporated to dryness and  $\text{H}_2\text{O}$  was added to it. The aqueous layer was extracted with  $\text{CH}_2\text{Cl}_2$ . The combined organic layers were washed with brine, dried over  $\text{Na}_2\text{SO}_4$  and evaporated to dryness. The residue was dissolved in 1.5 mL TFA and the solution was stirred at r.t. for 30 min, then evaporated to dryness, and the residue was purified by HPLC (eluent: A:  $\text{H}_2\text{O}$ , 0.1% TFA (v/v), B:  $\text{CH}_3\text{CN}/\text{H}_2\text{O}$  = 80/20, 0.1% TFA (v/v); gradient: A/B = 80/20 to 0/100, 25 min) to give **Gly-Pro-SiR640 (26)** (4.1 mg, 6.17  $\mu\text{mol}$ , 43% yield).  $^1\text{H-NMR}$  (400 MHz,  $\text{CD}_3\text{OD}$ ):  $\delta$  0.58 (d,  $J$  = 2.7 Hz 6H), 1.91-2.18 (m, 9H), 2.25-2.36 (m, 1H), 3.02 (t,  $J$  = 6.4 Hz, 2H), 3.52-3.69 (m, 5H), 3.90 (s, 2H), 4.10 (t,  $J$  = 6.4 Hz, 2H), 4.57-4.60 (m, 1H), 6.85 (s, 1H), 6.97 (d,  $J$  = 9.2 Hz, 1H), 7.24 (d,  $J$  = 7.8 Hz, 2H), 7.36 (t,  $J$  = 7.8 Hz, 1H), 7.52 (dd,  $J$  = 2.3, 9.2 Hz, 1H), 7.59 (s, 1H), 8.13 (d,  $J$  = 2.3 Hz, 1H); HRMS ( $\text{ESI}^+$ ): Calcd for 551.2842  $[\text{M}]^+$ ; Found, 551.2796 (-4.6 mDa). The HPLC chromatogram after purification is shown below (eluent: A:  $\text{H}_2\text{O}$ , 0.1% TFA (v/v), B:  $\text{CH}_3\text{CN}/\text{H}_2\text{O}$  = 80/20, 0.1% TFA (v/v); gradient: A/B = 80/20 to 0/100, 25 min; flow rate: 1.0 mL/min; detection: absorbance at 500 nm).

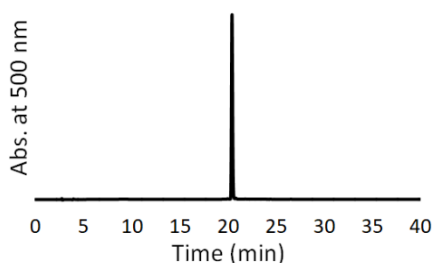

### Glu-Pro-SiR640 (27)

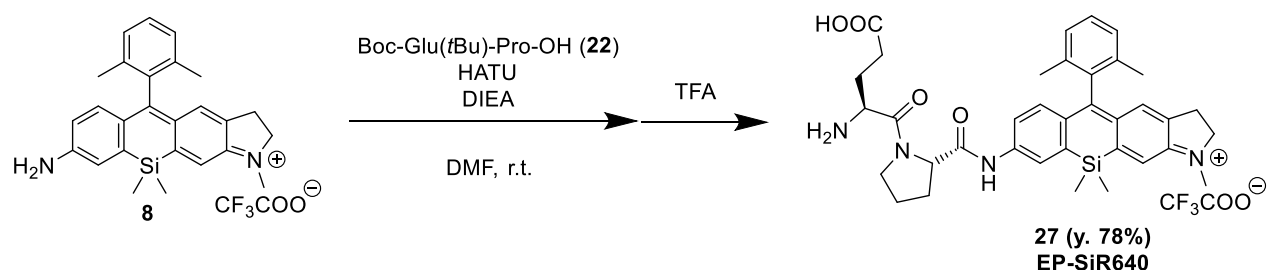

To a solution of **8** (6.4 mg, 12.5  $\mu$ mol) in 8 mL DMF, Boc-Glu(*Or*Bu)-Pro-OH (34 mg, 85.2  $\mu$ mol), HATU (28.6 mg, 75.2  $\mu$ mol) and DIEA (24.5  $\mu$ L, 0.144 mmol) were added and the mixture was stirred at r.t. for 21 h. The reaction mixture was evaporated to dryness and H<sub>2</sub>O was added to it. The aqueous layer was extracted with CH<sub>2</sub>Cl<sub>2</sub>. The combined organic layers were washed with brine, dried over Na<sub>2</sub>SO<sub>4</sub> and evaporated to dryness. The residue was dissolved in 1.5 mL TFA and the solution was stirred at r.t. for 30 min, then evaporated to dryness. The residue was purified by HPLC (eluent: A: H<sub>2</sub>O, 0.1% TFA (v/v), B: CH<sub>3</sub>CN/H<sub>2</sub>O = 80/20, 0.1% TFA (v/v); gradient: A/B = 80/20 to 0/100, 25 min) to give **Glu-Pro-SiR640 (27)** (7.2 mg, 9.77  $\mu$ mol, 78% yield). <sup>1</sup>H-NMR (400 MHz, CD<sub>3</sub>OD):  $\delta$  0.58 (d,  $J$  = 2.3 Hz 6H), 1.91-2.26 (m, 11H), 2.30-2.39 (m, 1H), 2.61 (t,  $J$  = 7.3 Hz, 2H), 3.01 (t,  $J$  = 6.4 Hz, 2H), 3.52 (s, 3H), 3.69-3.79 (m, 2H), 4.10 (t,  $J$  = 6.4 Hz, 2H), 4.36-4.39 (m, 1H), 4.58-4.62 (m, 1H), 6.85 (s, 1H), 6.97 (d,  $J$  = 9.2 Hz, 1H), 7.23 (d,  $J$  = 7.8 Hz, 2H), 7.36 (t,  $J$  = 7.8 Hz, 1H), 7.50 (dd,  $J$  = 2.3, 9.2 Hz, 1H), 7.59 (s, 1H), 8.15 (d,  $J$  = 2.3 Hz, 1H); HRMS (ESI<sup>+</sup>): Calcd for 623.3054 [M]<sup>+</sup>; Found, 623.3045 (-0.9 mDa). The HPLC chromatogram after purification is shown below (eluent: A: H<sub>2</sub>O, 0.1% TFA (v/v), B: CH<sub>3</sub>CN/H<sub>2</sub>O = 80/20, 0.1% TFA (v/v); gradient: A/B = 80/20 to 0/100, 25 min; flow rate: 1.0 mL/min; detection: absorbance at 500 nm).

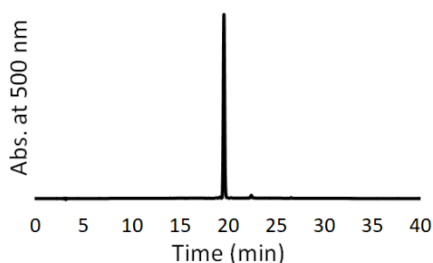



### Asp-Pro-SiR640 (28)

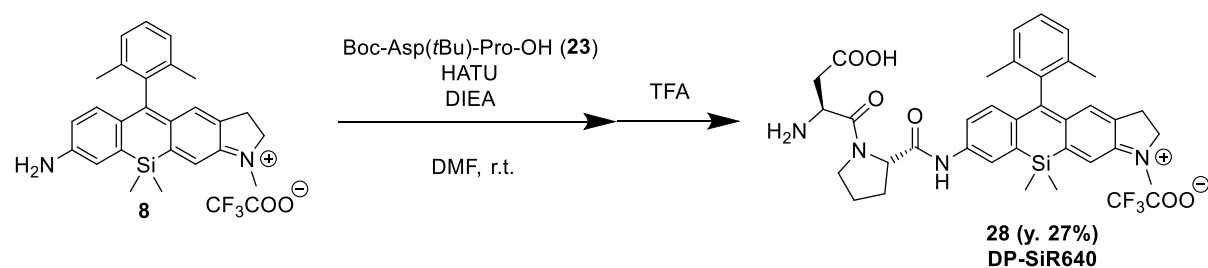

To a solution of **8** (9.3 mg, 18.2  $\mu$ mol) in 12 mL DMF, Boc-Asp(OtBu)-Pro-OH (61.4 mg, 0.159 mmol), HATU (53.3 mg, 0.140 mmol) and DIEA (46.0  $\mu$ L, 0.269 mmol) were added and the mixture was stirred at r.t. for 19 h. The reaction mixture was evaporated to dryness and H<sub>2</sub>O was added to it. The aqueous layer was extracted with CH<sub>2</sub>Cl<sub>2</sub>. The combined organic layers were washed with brine, dried over Na<sub>2</sub>SO<sub>4</sub> and evaporated to dryness. The residue was dissolved in 1.5 mL TFA and the solution was stirred at r.t. for 30 min, then evaporated to dryness. The residue was purified by HPLC (eluent: A: H<sub>2</sub>O, 0.1% TFA (v/v), B: CH<sub>3</sub>CN/H<sub>2</sub>O = 80/20, 0.1% TFA (v/v); gradient: A/B = 80/20 to 0/100, 25 min) to give **Asp-Pro-SiR640 (28)** (3.5 mg, 4.84  $\mu$ mol, 27% yield). <sup>1</sup>H-NMR (400 MHz, CD<sub>3</sub>OD):  $\delta$  0.58 (s, 6H), 1.91-2.17 (m, 9H), 2.29-2.38 (m, 1H), 2.74-2.80 (m, 1H), 3.00-3.11 (m, 3H), 3.52 (s, 3H), 3.64-3.77 (m, 2H), 4.10 (t,  $J$  = 6.4 Hz, 2H), 4.53-4.56 (m, 1H), 4.59-4.62 (m, 1H), 6.85 (s, 1H), 6.97 (d,  $J$  = 9.2 Hz, 1H), 7.24 (d,  $J$  = 7.8 Hz, 2H), 7.36 (t,  $J$  = 7.8 Hz, 1H), 7.50 (dd,  $J$  = 2.3, 9.2 Hz, 1H), 7.59 (s, 1H), 8.13 (d,  $J$  = 2.3 Hz, 1H); HRMS (ESI<sup>+</sup>): Calcd for 609.2897 [M]<sup>+</sup>; Found, 609.2891 (-0.6 mDa). The HPLC chromatogram after purification is shown below (eluent: A: H<sub>2</sub>O, 0.1% TFA (v/v), B: CH<sub>3</sub>CN/H<sub>2</sub>O = 80/20, 0.1% TFA (v/v); gradient: A/B = 80/20 to 0/100, 25 min; flow rate: 1.0 mL/min; detection: absorbance at 500 nm).

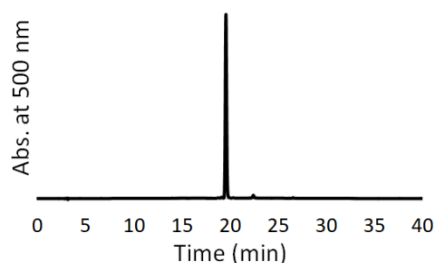

## Ser-Pro-SiR640 (29)

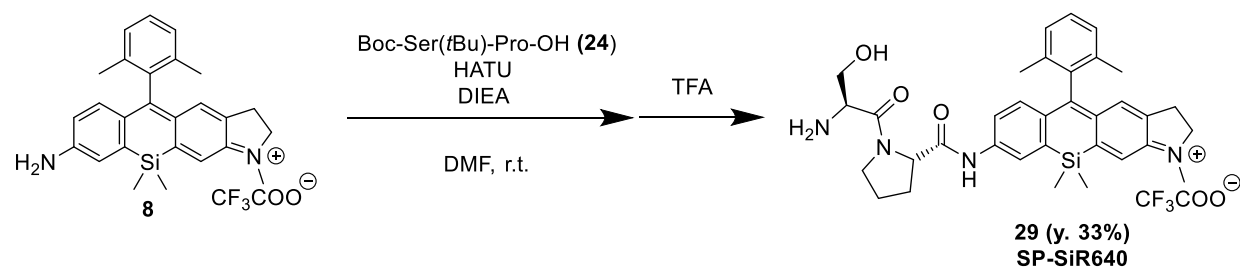

To a solution of **8** (8.8 mg, 17.2  $\mu$ mol) in 12 mL DMF, Boc-Ser(*t*Bu)-Pro-OH (53.9 mg, 0.150 mmol), HATU (50.5 mg, 0.133 mmol) and DIEA (43.0  $\mu$ L, 0.255 mmol) were added and the mixture was stirred at r.t. for 19 h. The reaction mixture was evaporated to dryness and H<sub>2</sub>O was added to it. The aqueous layer was extracted with CH<sub>2</sub>Cl<sub>2</sub>. The combined organic layers were washed with brine, dried over Na<sub>2</sub>SO<sub>4</sub> and evaporated to dryness. The residue was dissolved in 1.5 mL TFA and the solution was stirred at r.t. for 30 min, then evaporated to dryness. The residue was purified by HPLC (eluent: A: H<sub>2</sub>O, 0.1% TFA (v/v), B: CH<sub>3</sub>CN/H<sub>2</sub>O = 80/20, 0.1% TFA (v/v); gradient: A/B = 80/20 to 0/100 for 25 min) to give **Ser-Pro-SiR640 (29)** (4.0 mg, 5.76  $\mu$ mol, 33% yield). <sup>1</sup>H-NMR (400 MHz, CD<sub>3</sub>OD):  $\delta$  0.58 (d, *J* = 1.4 Hz, 6H), 1.91-2.17 (m, 9H), 2.29-2.39 (m, 1H), 3.02 (t, *J* = 6.4 Hz, 2H), 3.52 (s, 3H), 3.66-3.82 (m, 3H), 3.99-4.03 (m, 1H), 4.10 (t, *J* = 6.4 Hz, 2H), 4.28-4.31 (m, 1H), 4.59-4.63 (m, 1H), 6.85 (s, 1H), 6.97 (d, *J* = 9.2 Hz, 1H), 7.23 (d, *J* = 7.3 Hz, 2H), 7.36 (t, *J* = 7.3 Hz, 1H), 7.49 (dd, *J* = 2.3, 9.2 Hz, 1H), 7.59 (s, 1H), 8.13 (d, *J* = 2.3 Hz, 1H); HRMS (ESI<sup>+</sup>): Calcd for 581.2948 [M]<sup>+</sup>; Found, 581.2950 (+0.2 mDa). The HPLC chromatogram after purification is shown below (eluent: A: H<sub>2</sub>O, 0.1% TFA (v/v), B: CH<sub>3</sub>CN/H<sub>2</sub>O = 80/20, 0.1% TFA (v/v); gradient: A/B = 80/20 to 0/100, 25 min; flow rate: 1.0 mL/min; detection: absorbance at 500 nm).

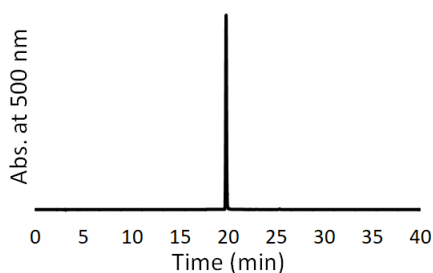

## Supporting Figures

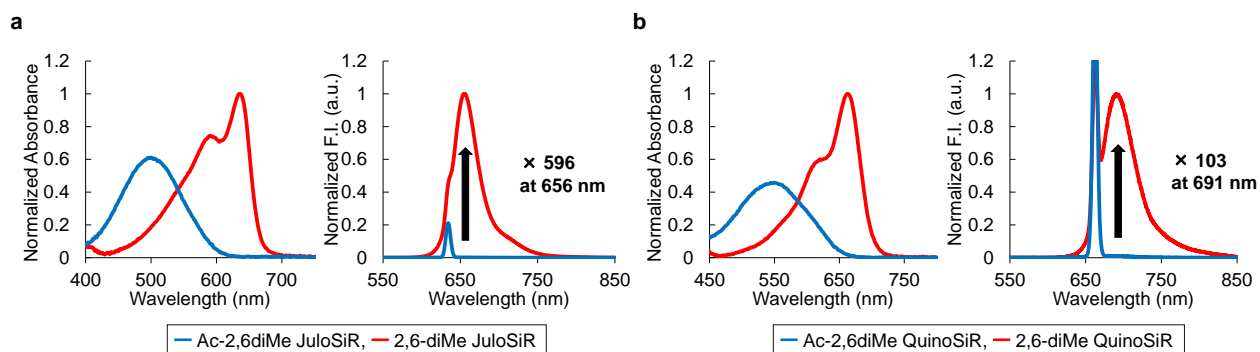

**Figure S1.** Normalized absorption and emission spectra of 1  $\mu\text{M}$  (a) **2,6-diMe JuloSiR** and **Ac-2,6-diMe JuloSiR** and (b) **2,6-diMe QuinoSiR** and **Ac-2,6-diMe QuinoSiR** in PBS (pH = 7.4) containing 0.1% DMSO as a co-solvent. The excitation wavelengths were 635 nm for (a) and 663 nm for (b). A sharp fluorescence peaks in (a) and (b) are the Rayleigh scattering of the excitation light.

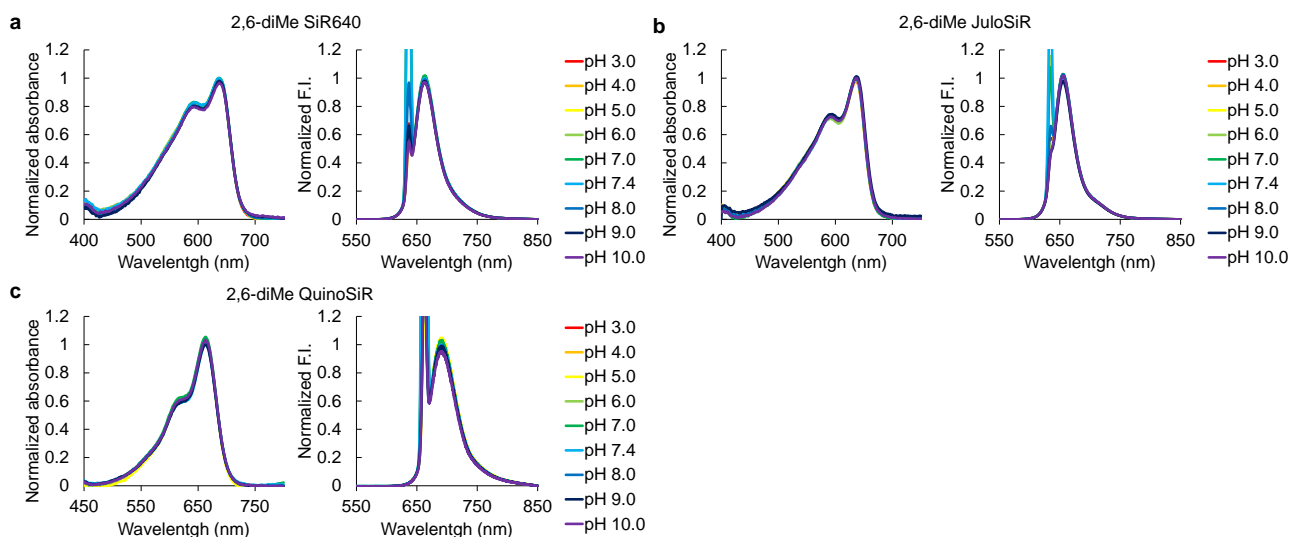

**Figure S2.** Normalized absorption and emission spectra of 1  $\mu\text{M}$  **2,6-diMe SiR640**, **2,6-diMe JuloSiR** and **2,6-diMe QuinoSiR** in 100 mM NaPi buffer at various pH values. The absorbance and the fluorescence intensity in 100 mM NaPi buffer (pH = 7.4) containing 0.1% DMSO as a co-solvent were set to 1.0 for normalization. The excitation wavelengths were 637 nm for (a), 635 nm for (b), and 663 nm for (c), respectively. A sharp fluorescence

peaks in (a)-(c) are the Rayleigh scattering of the excitation light.

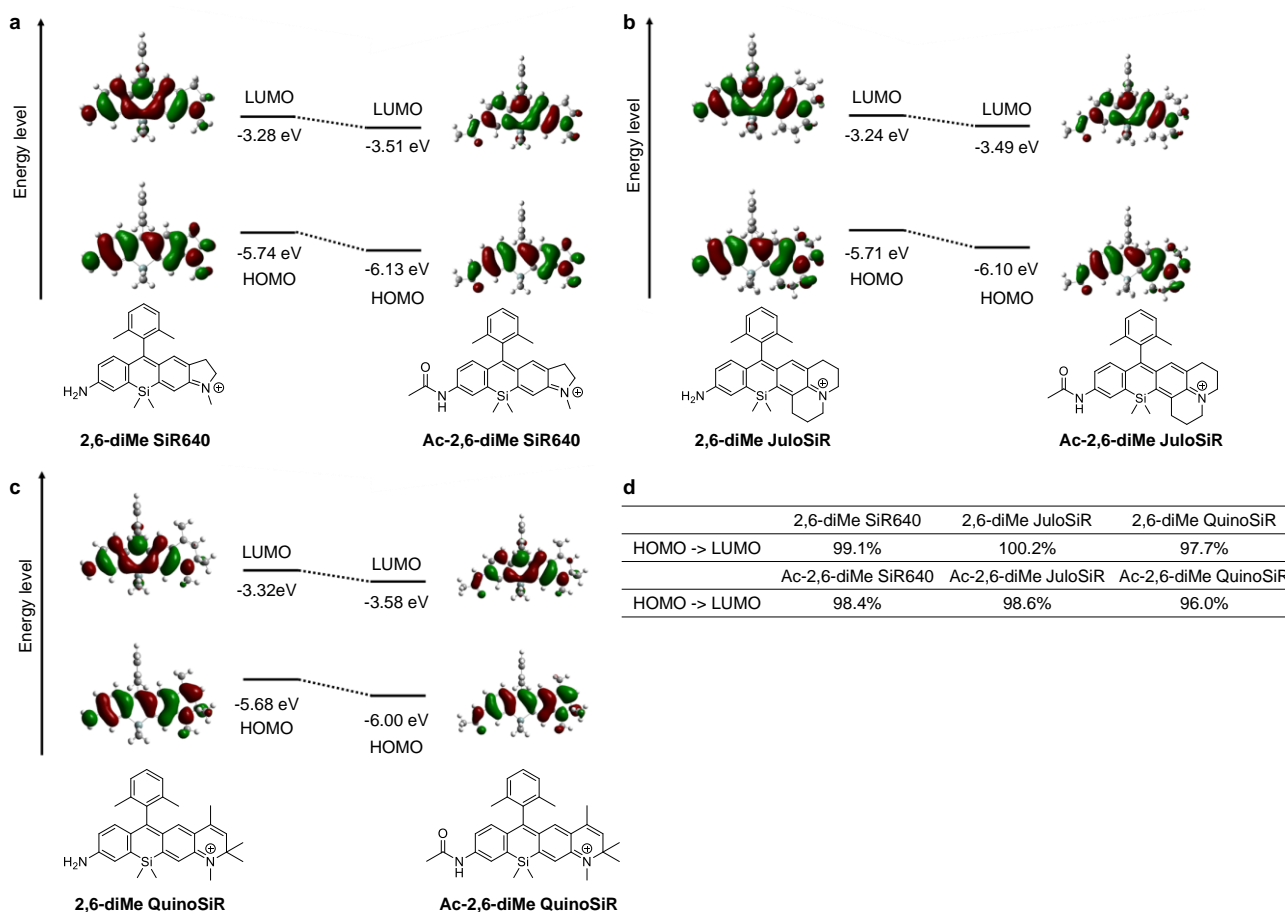

**Figure S3.** Molecular orbital calculations of **2,6-diMe SiR640**, **2,6-diMe JuloSiR** and **2,6-diMe QuinoSiR** and their acylated derivatives; (a) **2,6-diMe SiR640** and **Ac-2,6-diMe SiR640**, (b) **2,6-diMe JuloSiR** and **Ac-2,6-diMe JuloSiR**, and (c) **2,6-diMe QuinoSiR** and **Ac-2,6-diMe QuinoSiR**. Calculations were performed at the B3LYP/6-31+G\* level with water as the solvent. (d) Transition probability between HOMO and LUMO of each compound.

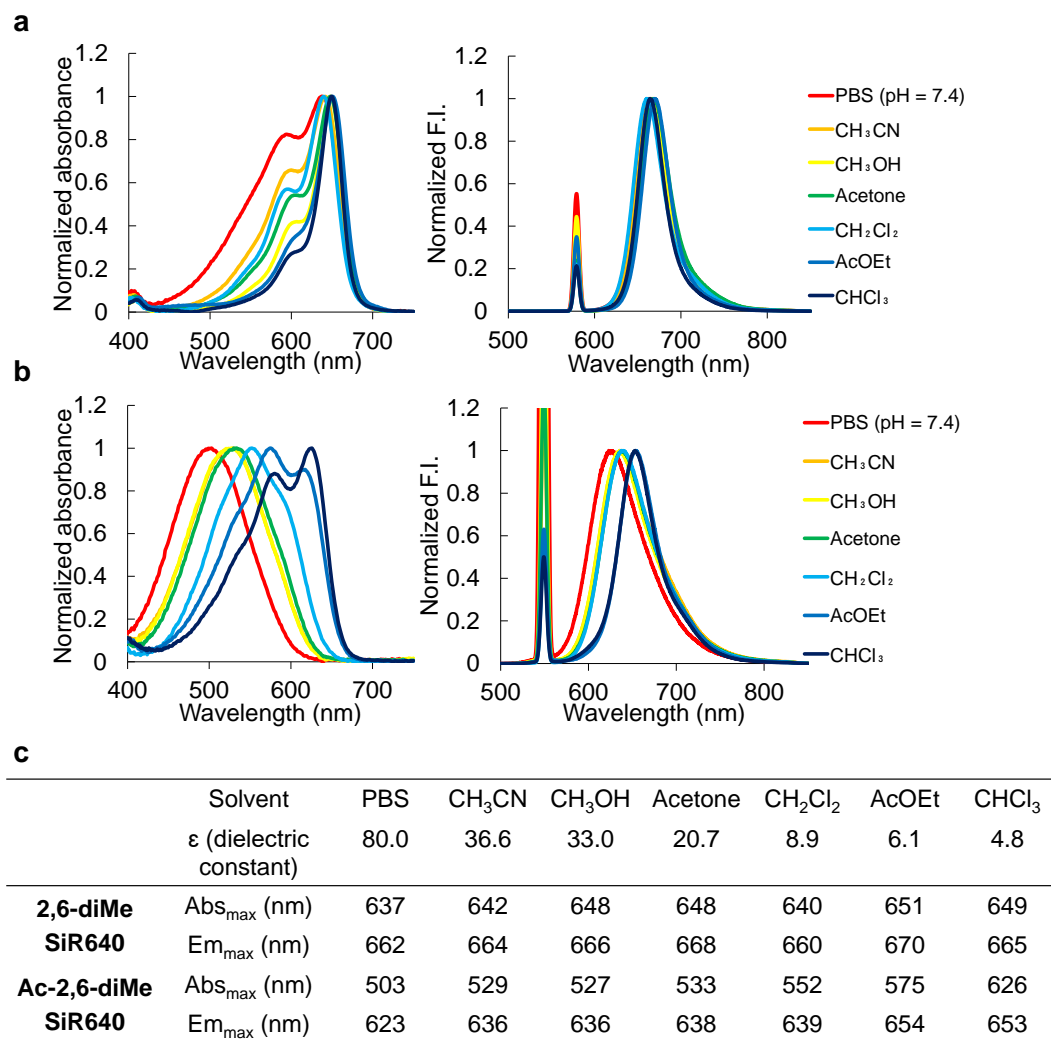

**Figure S4.** (a,b) Normalized (a) absorption and (b) emission spectra of 1  $\mu$ M **2,6-diMe SiR640** and **Ac-2,6-diMe SiR640** in organic solvents with various dielectric constants containing 0.1% DMSO as a co-solvent. The excitation wavelengths were 580 nm for **2,6-diMe SiR640** and 550 nm for **Ac-2,6-diMe SiR640**. A sharp fluorescence peaks in (a) and (b) are the Rayleigh scattering of the excitation light. (c) The maximum wavelengths of absorption and emission of **2,6-diMe SiR640** and **Ac-2,6-diMe SiR640** in various organic solvents.

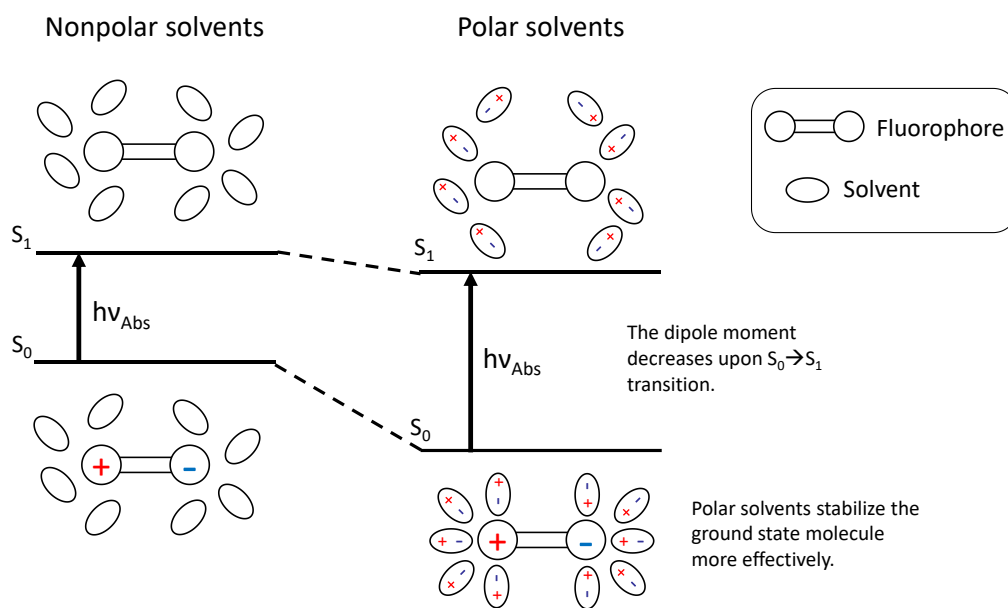

**Figure S5.** Solvatochromic effects on the absorption wavelength of the environment-sensitive fluorophore.<sup>[11-13]</sup>

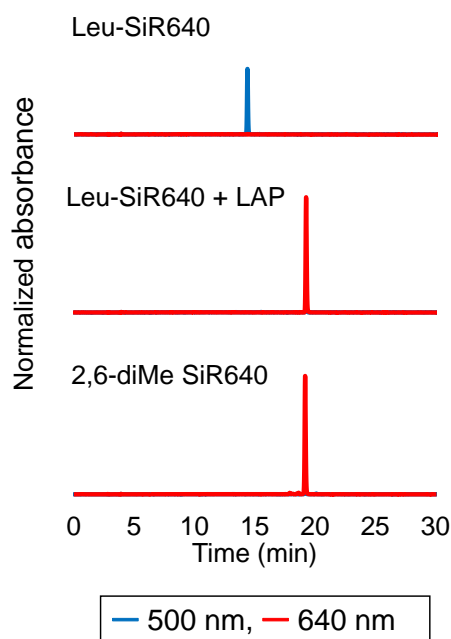

**Figure S6.** HPLC chromatograms of 10  $\mu\text{M}$  **Leu-SiR640** before and after addition of LAP (5.5 ng), and 10  $\mu\text{M}$  **2,6-diMe SiR640** (eluent: A:  $\text{H}_2\text{O}$ , 0.1% TFA (v/v), B:  $\text{CH}_3\text{CN}/\text{H}_2\text{O}$  = 80/20, 0.1% TFA (v/v); gradient: A/B = 80/20 to 0/100, 20 min; flow rate: 1.0 mL/min; detection: absorbance at 500 nm and 640 nm).

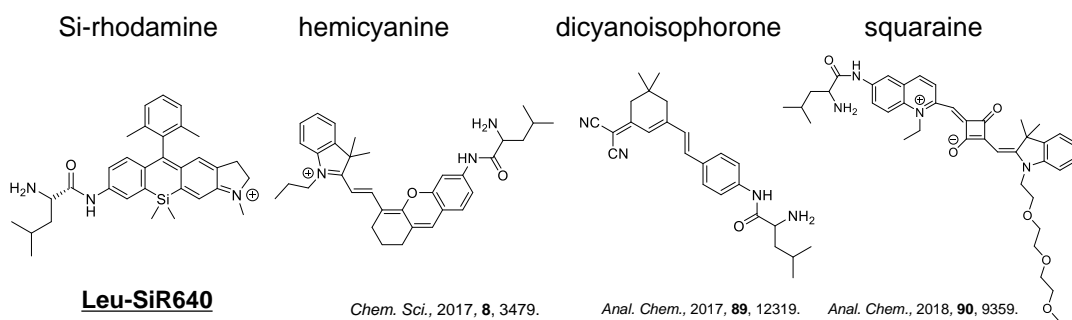

| Fluorophore                          | Si-rhodamine | hemicyanine | discyanophorone | squaraine |
|--------------------------------------|--------------|-------------|-----------------|-----------|
| $\lambda_{\text{ex/em}}$ (nm)        | 637/660      | 670/705     | 460/658         | 650/710   |
| $\Delta\text{Abs}_{\text{max}}$ (nm) | 137          | 72          | 65              | ~ 10      |
| Fold increase                        | ~ 600        | 32          | ~ 20            | 9         |
| $K_{\text{m}}$ ( $\mu\text{M}$ )     | 6.36         | 123         | 24.1            | 10.8      |

**Figure S7.** Comparison of NIR fluorescent probes for detecting LAP activity.  $\Delta\text{Abs}_{\text{max}}$  indicates the difference between the maximum absorption wavelengths before and after the enzymatic reaction. Fold increase indicates the fold increase of fluorescence after the enzymatic reaction.

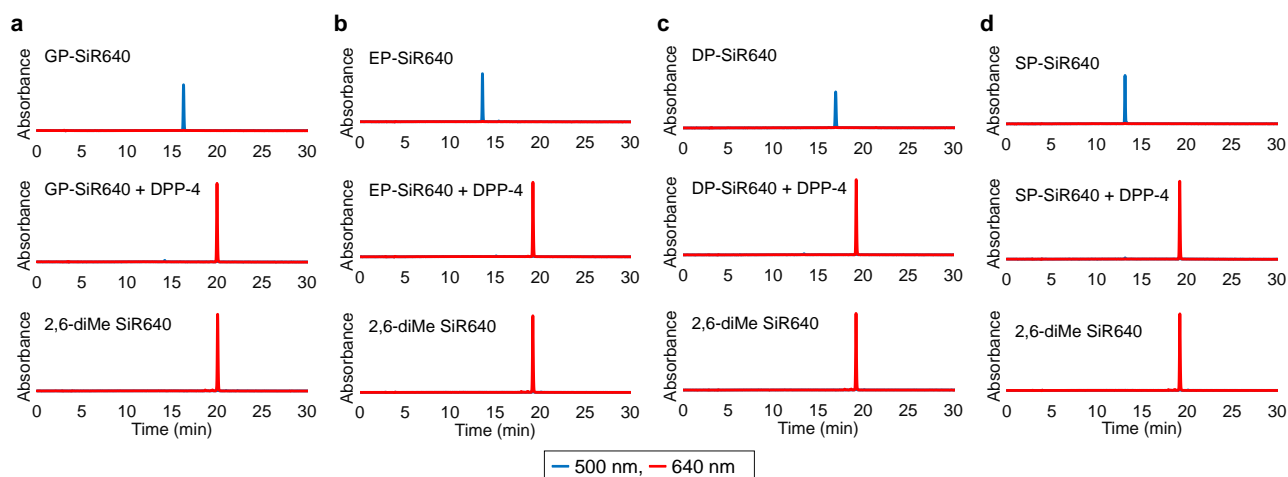

**Figure S8.** HPLC chromatograms of 10  $\mu$ M (a) **GP-SiR640**, (b) **EP-SiR640**, (c) **DP-SiR640** and (d) **SP-SiR640** before and after the addition of DPP-4 (0.12  $\mu$ g), and 10  $\mu$ M **2,6-diMe SiR640** containing 1% DMSO as a co-solvent (eluent: A: H<sub>2</sub>O, 0.1% TFA (v/v), B: CH<sub>3</sub>CN/H<sub>2</sub>O = 80/20, 0.1% TFA (v/v); gradient: A/B = 80/20 to 0/100, 20 min; flow rate: 1.0 mL/min; detection: absorbance at 500 nm and 640 nm).

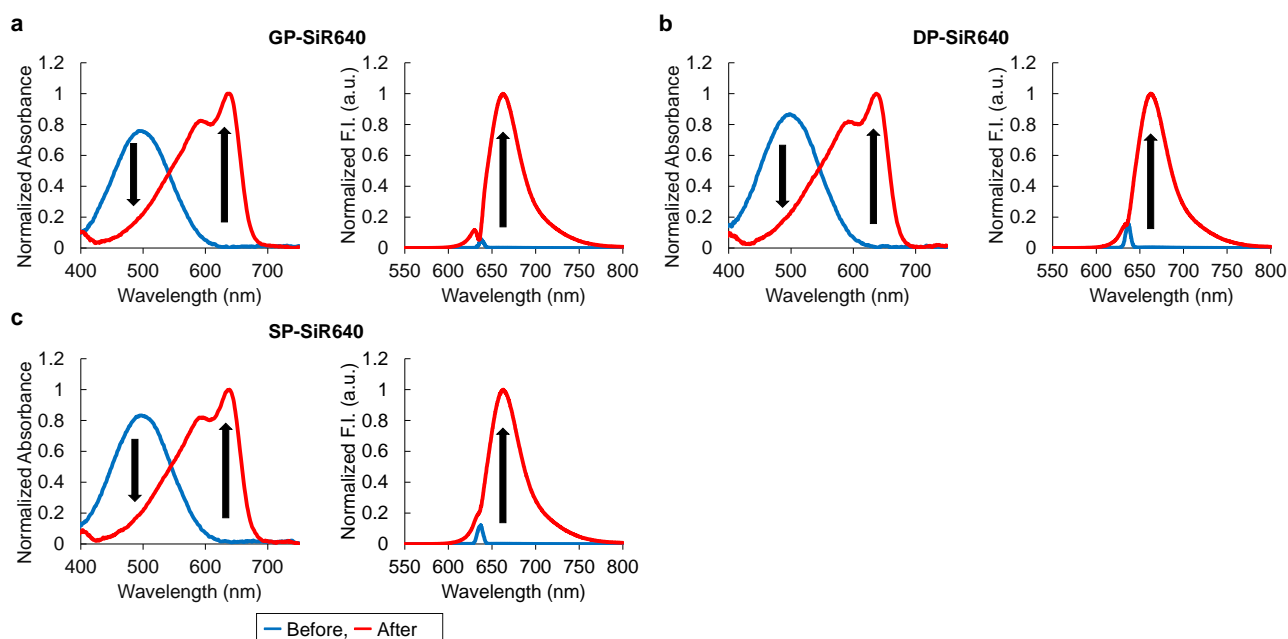

**Figure S9.** Normalized absorption and emission spectra of 1  $\mu$ M (a) **GP-SiR640**, (b) **DP-SiR640** and (c) **SP-SiR640** upon addition of DPP-4 (0.24  $\mu$ g) in 10 mM HEPES buffer (pH = 7.4) containing 0.1% DMSO as a co-solvent. The excitation wavelength was 637 nm. A sharp small fluorescence peaks in (a)-(c) are the Rayleigh scattering of the excitation light.



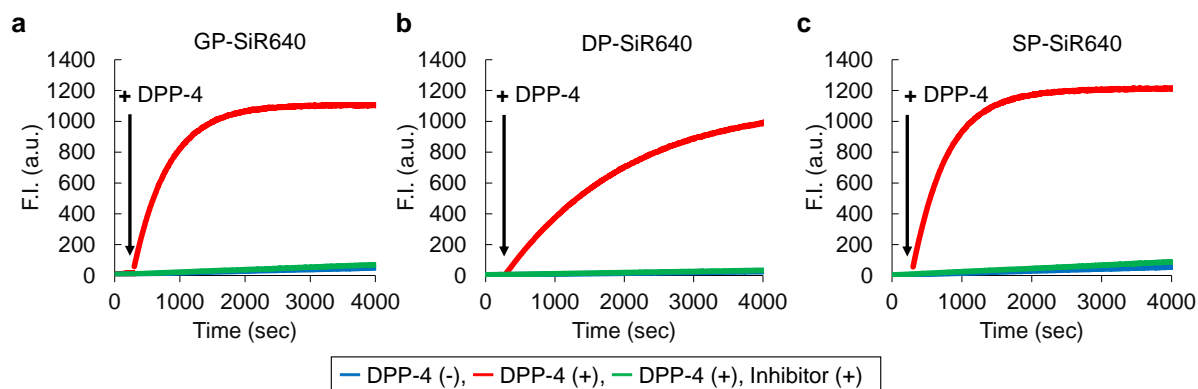

**Figure S10.** Time-course of the fluorescence intensity of 1  $\mu$ M (a) **GP-SiR640**, (b) **DP-SiR640** and (c) **SP-SiR640** upon addition of DPP-4 (0.24  $\mu$ g, at 300 sec) in 10 mM HEPES buffer (pH = 7.4) containing 0.1% DMSO as a co-solvent. The excitation and emission wavelengths were 637 nm and 660 nm, respectively. The concentration of the inhibitor (sitagliptin) was 1.8  $\mu$ M.

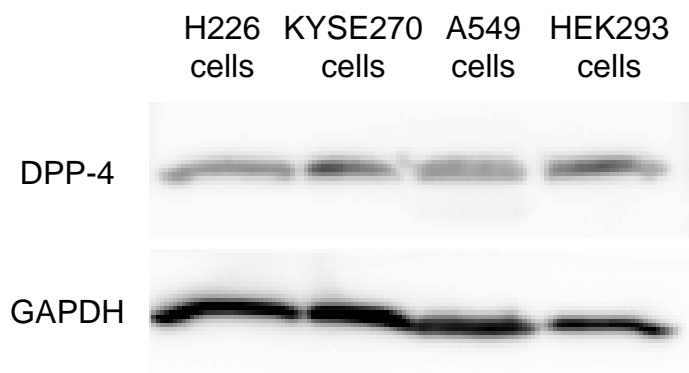

**Figure S11.** Western blotting analysis for DPP-4 in H226, KYSE270, A549 and HEK293 cells. Rabbit polyclonal DPP4 antibody (Proteintech, 10940-1-AP) and anti-GAPDH mouse monoclonal antibody (Santa Cruz Biotechnology, sc-32233) were used as primary antibodies. The detection was performed by chemiluminescence.

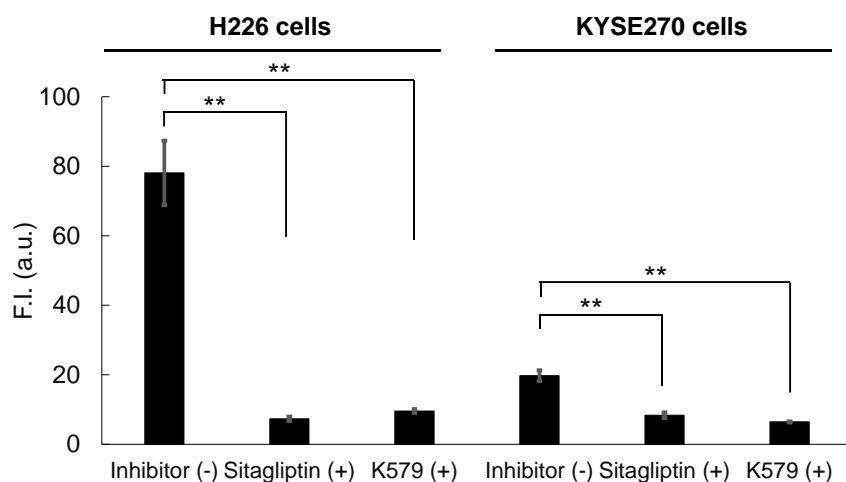

**Figure S12.** The fluorescence intensities of H226 and KYSE270 cells incubated with 1  $\mu$ M **EP-SiR640** for 10 min. Error bars represent  $\pm$ S.E. (n = 4). \*\* indicates  $p < 0.01$  by Student's *t*-test.

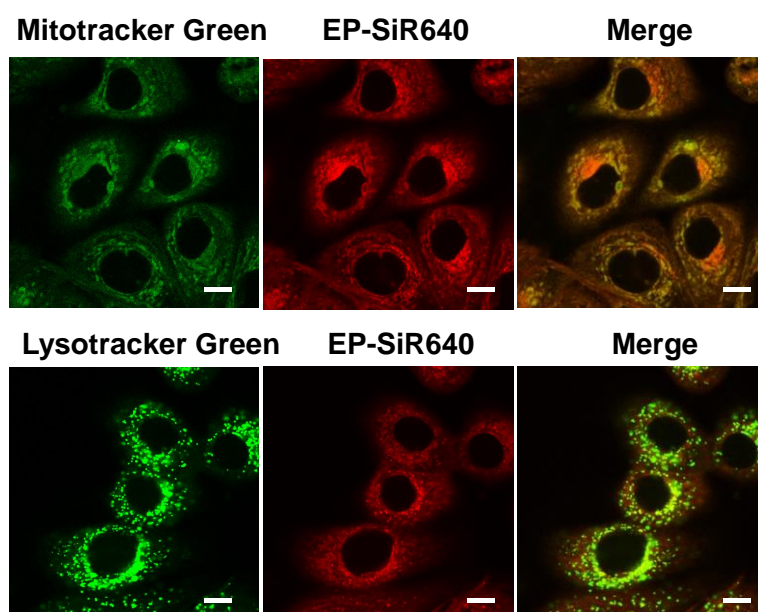

**Figure S13.** Fluorescence confocal microscopy images of live H226 cells treated with intracellular organelle indicators. Cells were incubated with 1  $\mu$ M **EP-SiR640** and 100 nM MitoTracker® Green FM containing 0.2% DMSO as a co-solvent for 30 min, or incubated with 1  $\mu$ M **EP-SiR640** and 50 nM LysoTracker® Green DND26 containing 0.2% DMSO as a co-solvent for 60 min. The excitation and emission wavelengths were 488 and 515-550 nm for MitoTracker® Green FM and LysoTracker® Green DND26, or 633 nm and 660-695 nm for **EP-SiR640**, respectively. Scale bars represent 10  $\mu$ m.

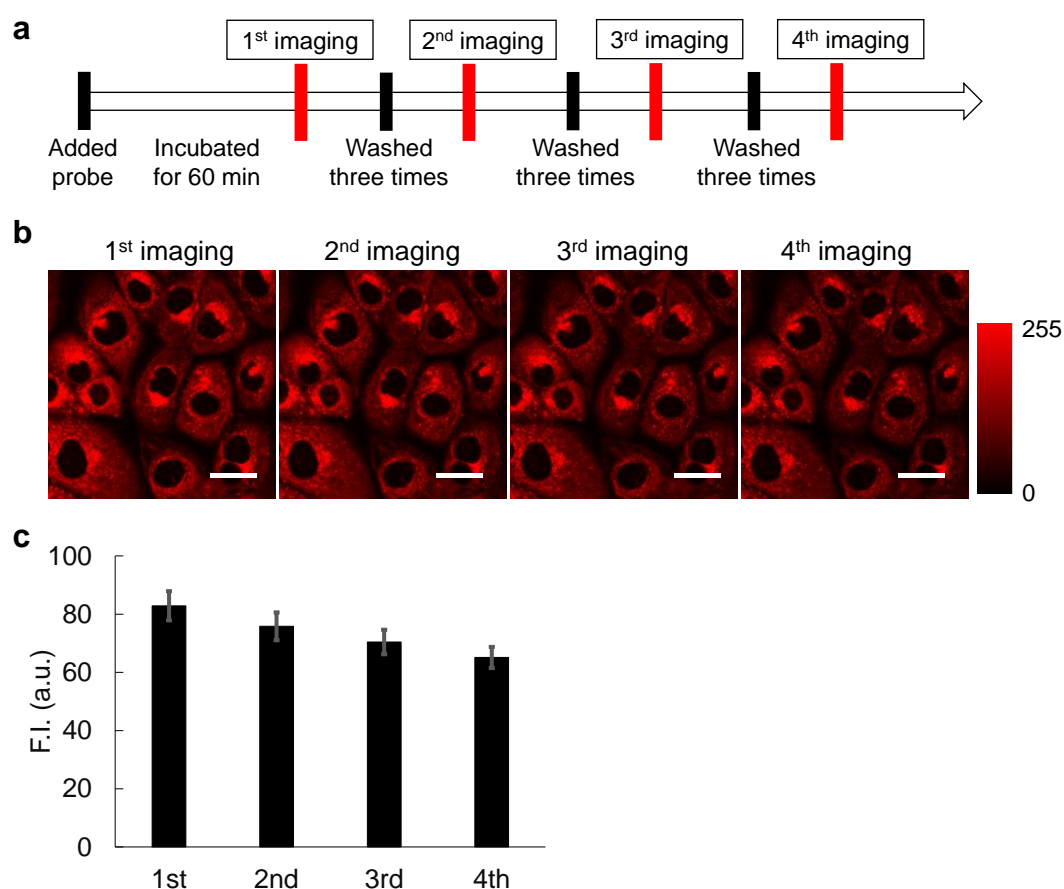

**Figure S14.** a) Experimental protocol for evaluating the intracellular retention of **EP-SiR640**. H226 cells were incubated with 1  $\mu\text{M}$  **EP-SiR640** containing 0.1% DMSO as a co-solvent for 60 min, then washed with HBSS three times. This washing process was repeated two times. b) Fluorescence confocal microscopy images of live H226 cells. The excitation and emission wavelengths were 633 nm and 660-695 nm, respectively. Scale bars represent 25  $\mu\text{m}$ . c) The fluorescence intensity of H226 cells incubated with **EP-SiR640**. Error bars represent  $\pm$ S.E. (n = 4).

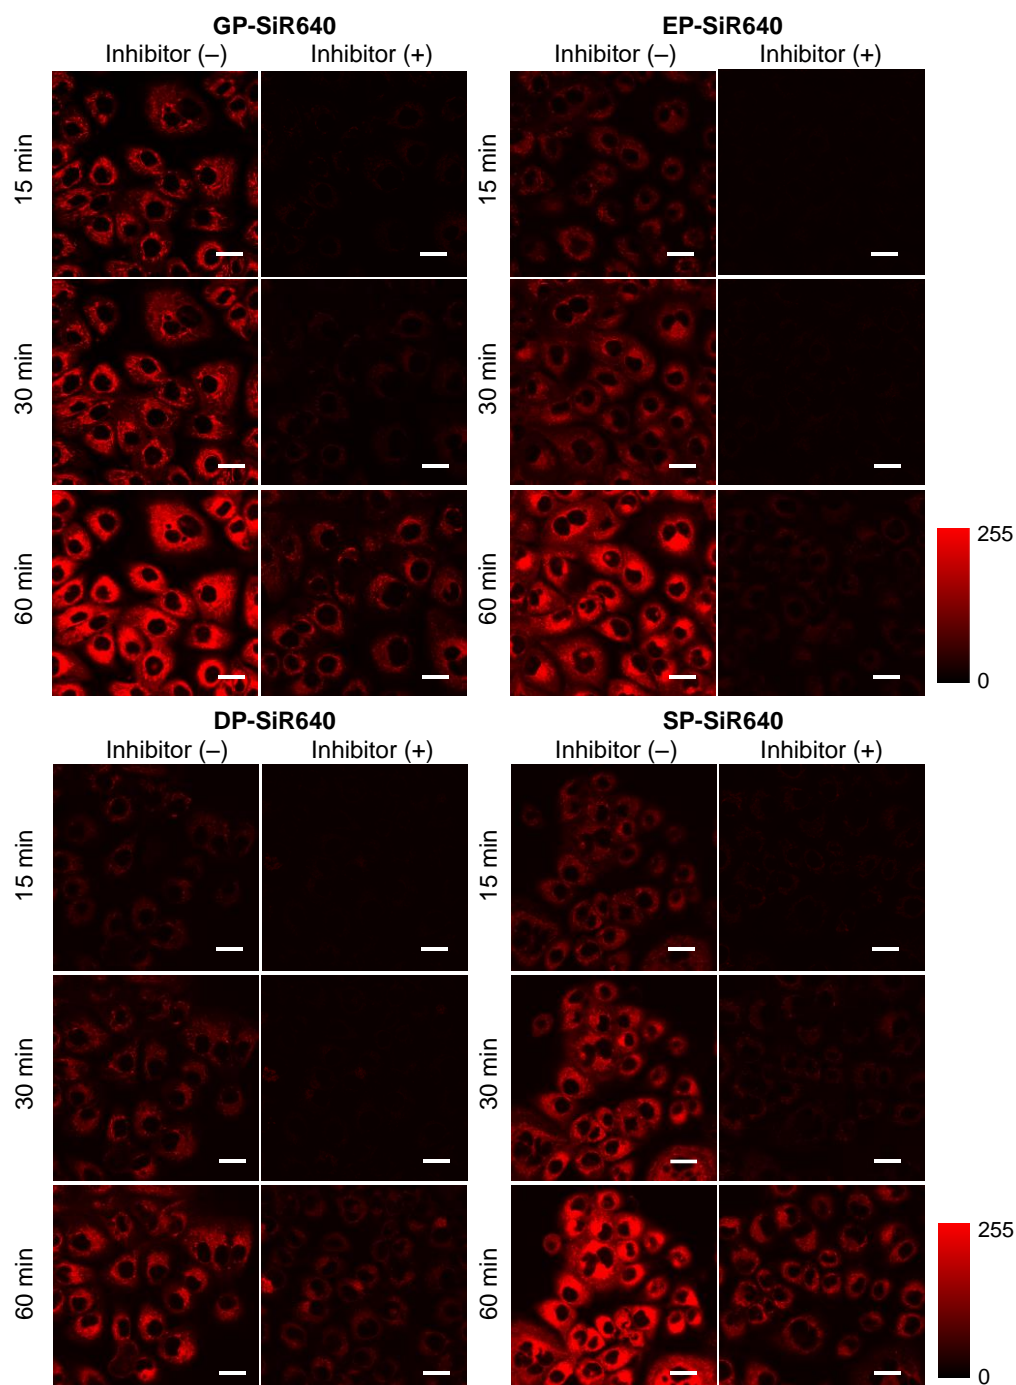

**Figure S15.** Fluorescence confocal microscopy images of live H226 cells treated with or without DPP-4 inhibitor (sitagliptin). Cells were pre-incubated with 18  $\mu\text{M}$  sitagliptin containing 0.2% DMSO as a co-solvent for 30 min and then incubated with 1  $\mu\text{M}$  **GP-SiR640**, **EP-SiR640**, **DP-SiR640** or **SP-SiR640** containing 0.1% DMSO as a co-solvent for up to 60 min. The excitation and emission wavelengths were 633 nm and 660-695 nm, respectively. Scale bars represent 25  $\mu\text{m}$ .

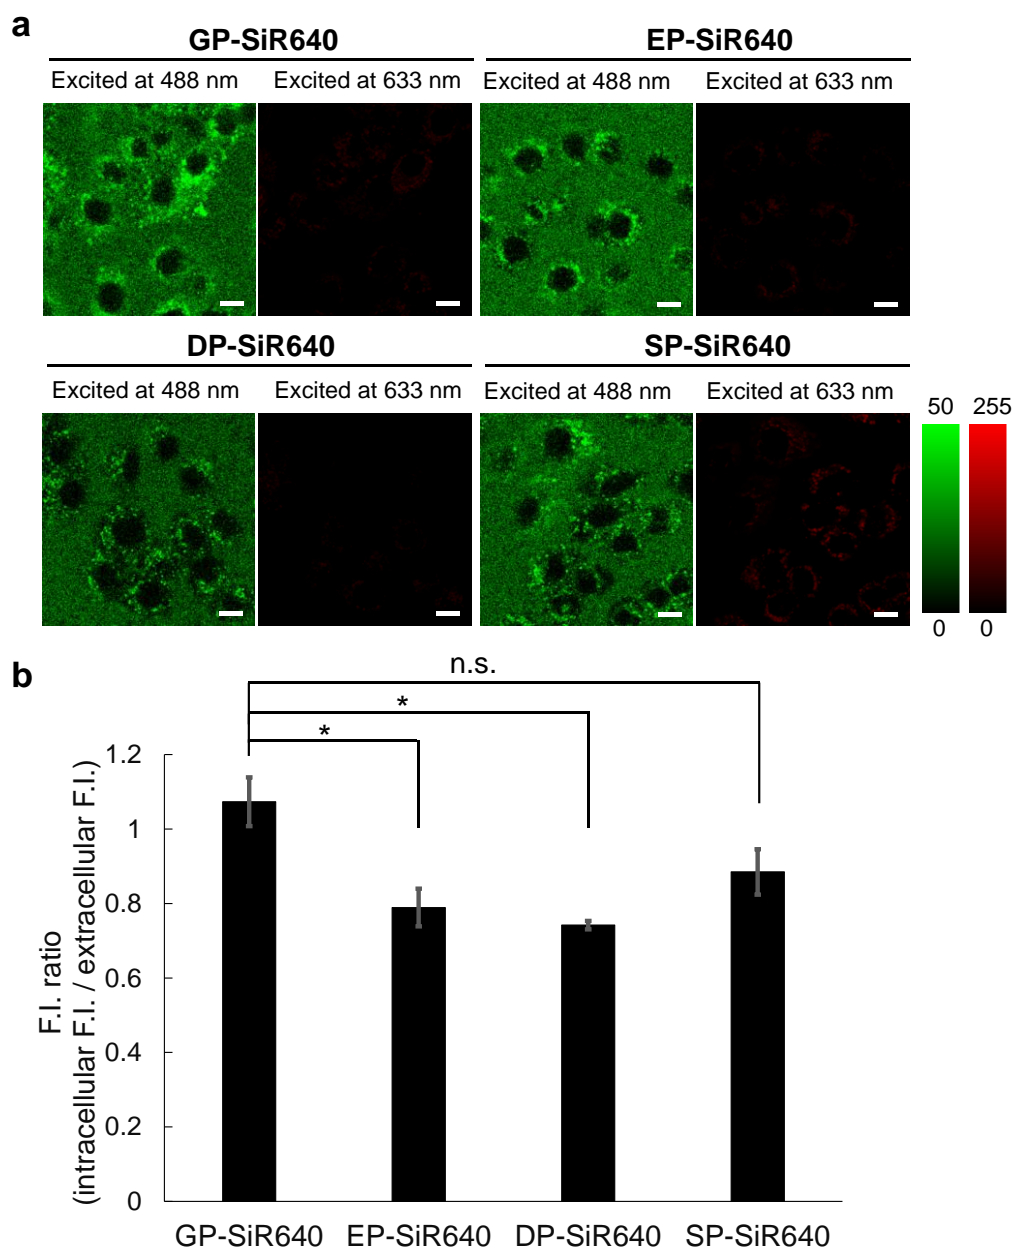

**Figure S16.** a) Fluorescence confocal microscopy images of live A549 cells. Cells were incubated with 10  $\mu$ M **GP-SiR640**, **EP-SiR640**, **DP-SiR640** or **SP-SiR640** containing 0.1% DMSO as a co-solvent for 5 min. The excitation and emission wavelengths were 488 nm and 565-600 nm for **GP-SiR640**, **EP-SiR640**, **DP-SiR640** and **SP-SiR640** (before the enzymatic reaction with DPP-4), 633 nm and 660-695 nm for **2,6-diMe SiR640** (after the enzymatic reaction with DPP-4), respectively. Scale bars represent 10  $\mu$ m. b) The relative fluorescence intensities of A549 cells incubated with each probe for 5 min. Error bars represent  $\pm$ S.E. (n = 4). \* indicates  $p < 0.05$  and n.s. indicates not significant by Student's *t*-test.

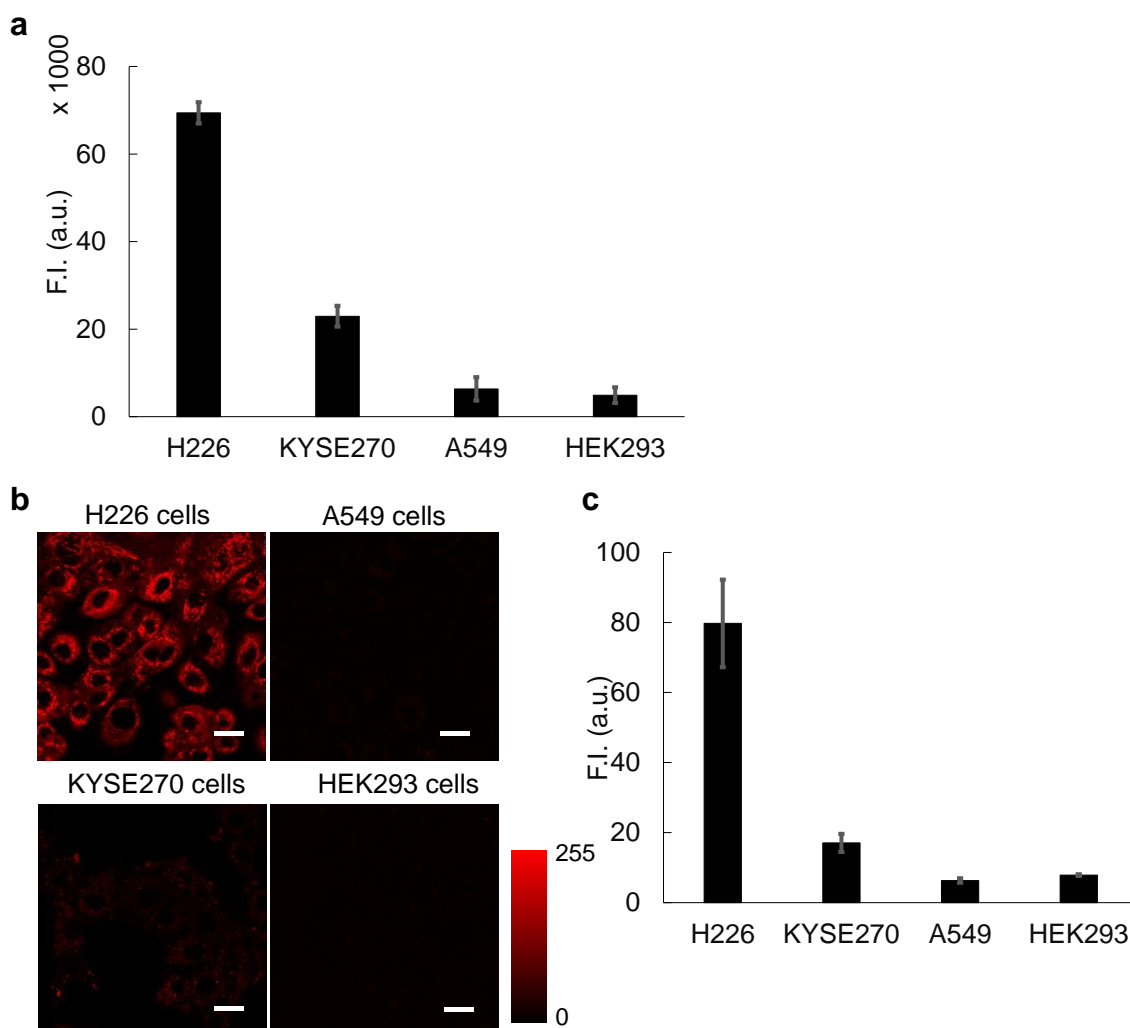

**Figure S17.** Measurements of the DPP-4 activity in various live cells using **EP-SiR640**. (a) Fluorescence intensity of 1  $\mu$ M **EP-SiR640** upon addition of 500 ng cell lysate in 10 mM HEPES buffer (pH = 7.4) containing 1% DMSO as a co-solvent. The excitation and emission wavelengths were 620 nm and 685 nm, respectively. Error bars represent  $\pm$ S.E. (n = 4). (b) Fluorescence confocal microscopy images of live H226, KYSE270, A549 or HEK293 cells. Each cell line was incubated with 1  $\mu$ M **EP-SiR640** containing 0.1% DMSO as a co-solvent for 10 min. The excitation and emission wavelengths were 633 nm and 660-695 nm, respectively. Scale bars represent 25  $\mu$ m. (c) The fluorescence intensity of each cell line incubated with **EP-SiR640**. Error bars represent  $\pm$ S.E. (n = 4).

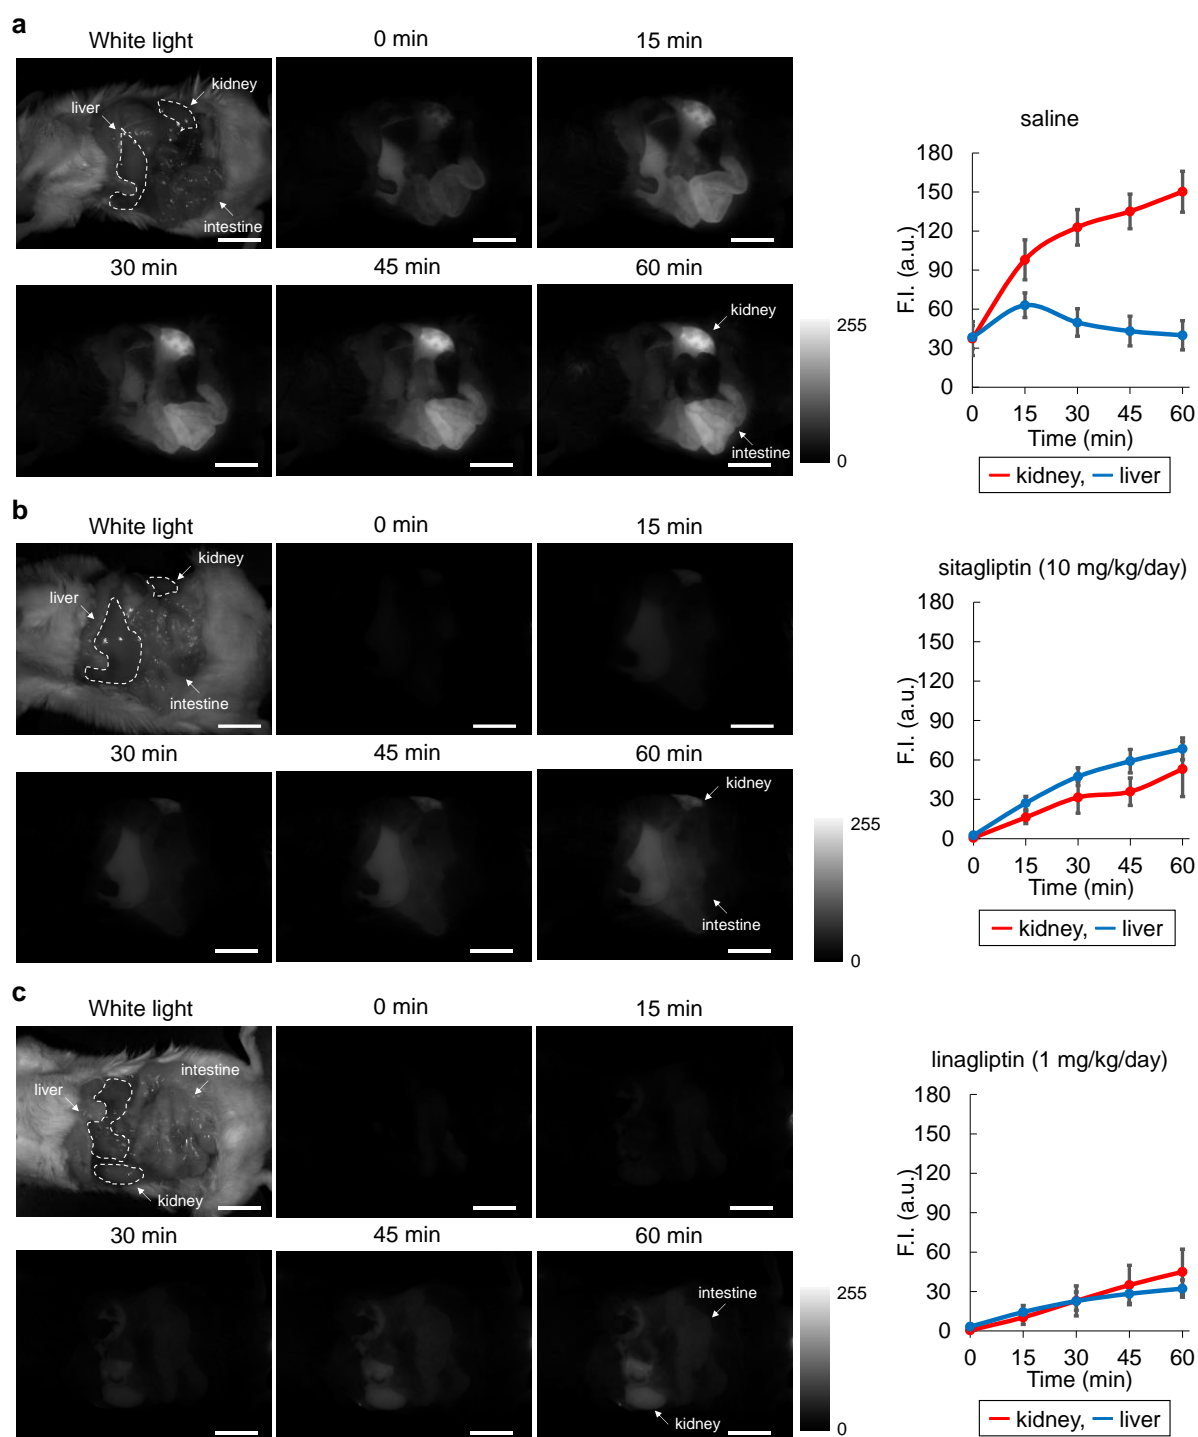

**Figure S18.** a-c) Fluorescence images of BALB/cAJcl mice (male, 6 weeks old) orally administered with (a) saline, (b) sitagliptin (10 mg/kg/day), or (c) linagliptin (1 mg/kg/day) for 1 week and then intravenously injected with 100  $\mu$ M EP-SiR640 in 100  $\mu$ L saline containing 1% DMSO as a co-solvent via the tail vein. The excitation and emission wavelengths were 635 (616-661) nm and 700 nm, respectively. Scale bars represent 10 mm. The graphs represent the fluorescence intensity changes in kidney and liver. Error bars represent  $\pm$ S.E. (n = 6).



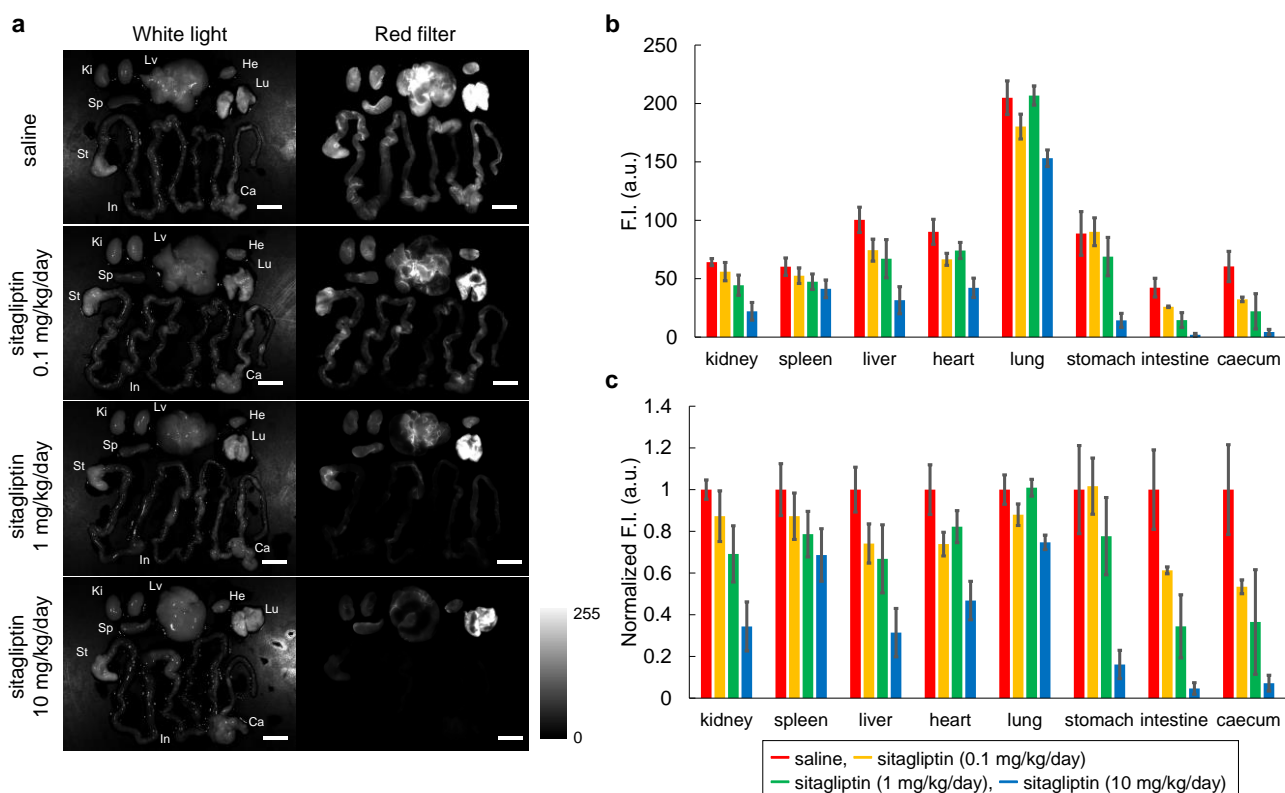

**Figure S19.** a) Fluorescence images of the organs of BALB/cAJcl mice (male, 6 weeks old) orally administered with saline or various concentrations of sitagliptin (0.1, 1, or 10 mg/kg/day) for 3 days. The removed organs were incubated with 10  $\mu$ M **EP-SiR640** in 1.5 mL saline containing 1% DMSO as a co-solvent for 20 min. The excitation and emission wavelengths were 635 (616-661) nm and 700 nm, respectively. Scale bars represent 10 mm. Ki: kidney, Sp: spleen, Lv: liver, He: heart, Lu: lung, St: stomach, In: intestine, Ca: caecum. b-c) The fluorescence intensity (b) or the normalized fluorescence intensity (c) of each mouse organ. Error bars represent  $\pm$ S.E. (n = 4).



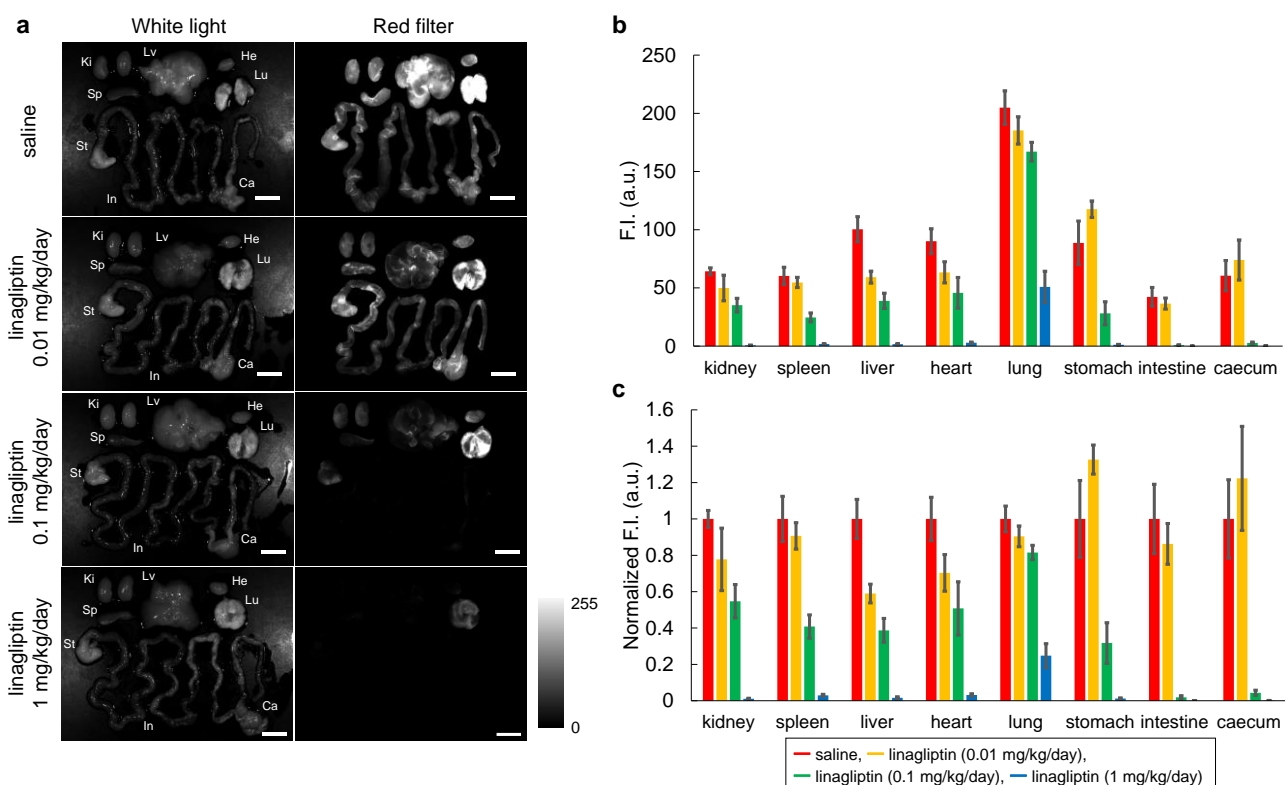

**Figure S20.** a) Fluorescence images of the organs of BALB/cAJcl mouse (male, 6 weeks old) orally administered with saline or various concentrations of linagliptin (0.01, 0.1, or 1 mg/kg/day) for 3 days. The removed organs were incubated with 10  $\mu$ M **EP-SiR640** in 1.5 mL saline containing 1% DMSO as a co-solvent for 20 min. The excitation and emission wavelengths were 635 (616-661) nm and 700 nm, respectively. Scale bars represent 10 mm. Ki: kidney, Sp: spleen, Lv: liver, He: heart, Lu: lung, St: stomach, In: intestine, Ca: caecum. b-c) The fluorescence intensity (b) or the normalized fluorescence intensity (c) of each mouse organ. Error bars represent  $\pm$ S.E. (n = 4).

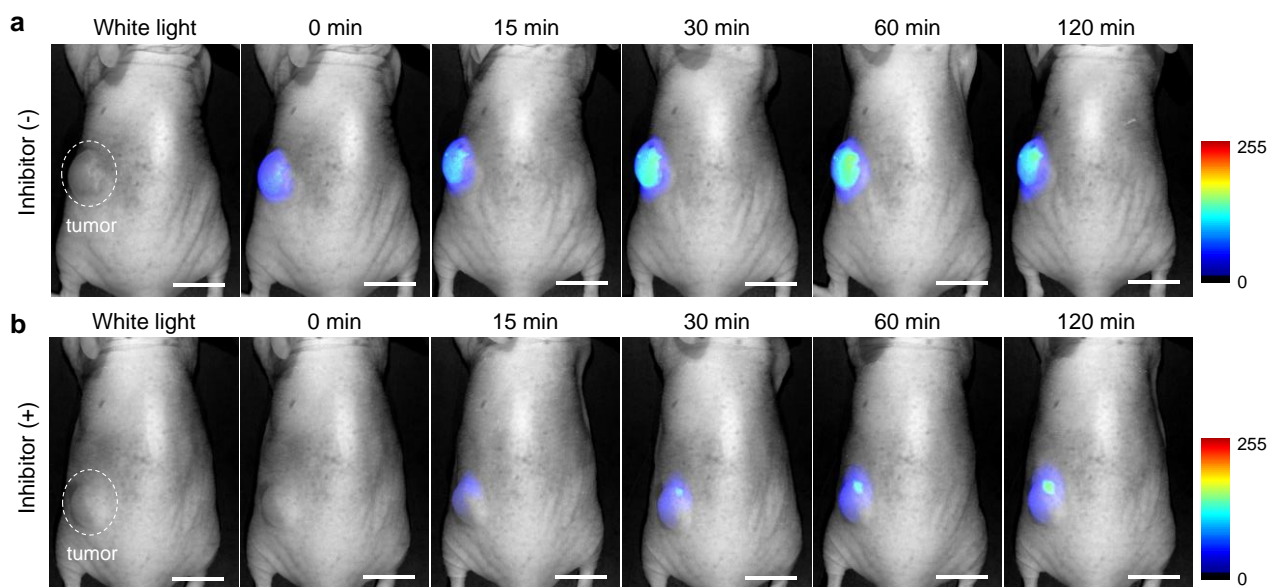

**Figure S21.** a-b) Fluorescence images of tumor-bearing BALB/cA-nu-nu mice (female, 5 weeks old) intratumorally injected with saline or 0.05 mg sitagliptin in 10  $\mu$ L saline, then with 100  $\mu$ M **EP-SiR640** in 10  $\mu$ L saline containing 1% DMSO as a co-solvent. The excitation and emission wavelengths were 635 (616-661) nm and 700 nm, respectively. Scale bars represent 10 mm.

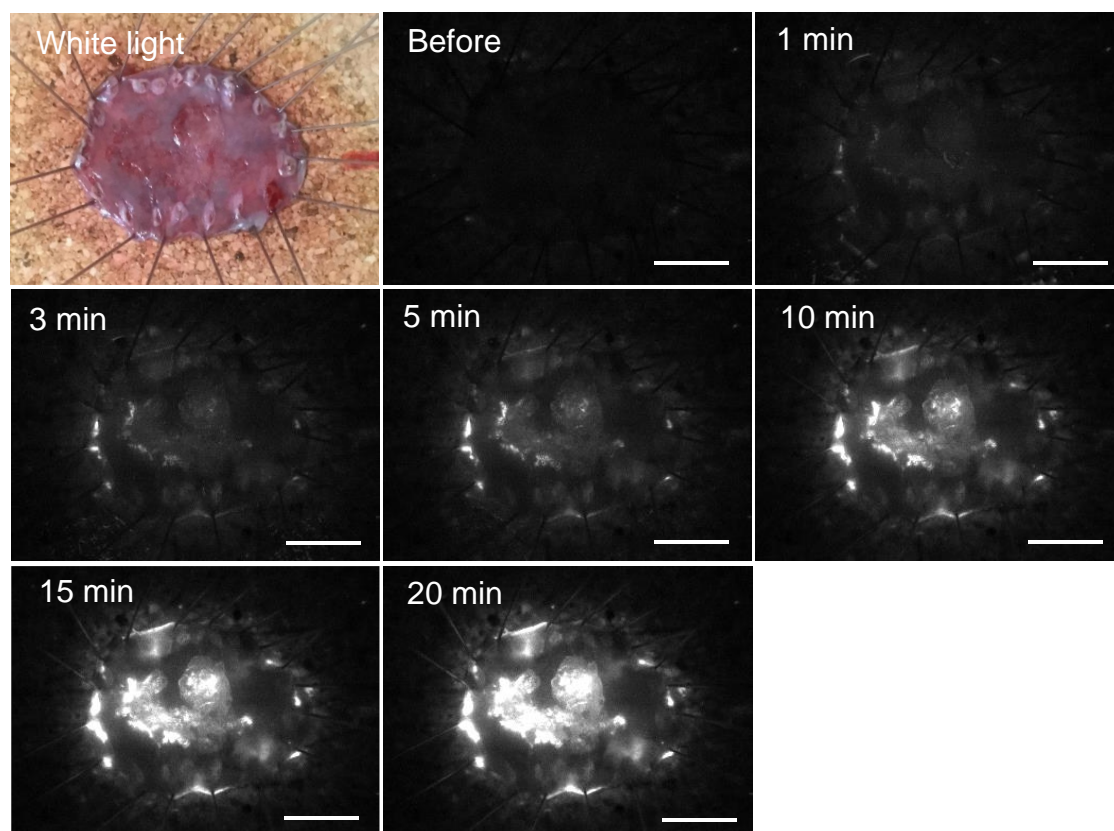

**Figure S22.** Fluorescence images of esophageal cancer in a clinical specimen resected by ESD. 50  $\mu$ M **EP-SiR640** in PBS (pH = 7.4) containing 0.5% DMSO as a co-solvent was added to the specimen. The excitation and emission wavelengths were 635 (616-661) nm and 700 nm, respectively. Scale bars represent 10 mm.

**No.1:** The ESD specimen of esophageal cancer was stained with Lugol's staining solution, then sprayed with **EP-SiR640** after the washing process.

The boundary between the tumor and normal tissues in this fluorescence image is clear, and is in good agreement with that in the Lugol's staining, as well as with the pathological diagnosis and distribution of the tumor.

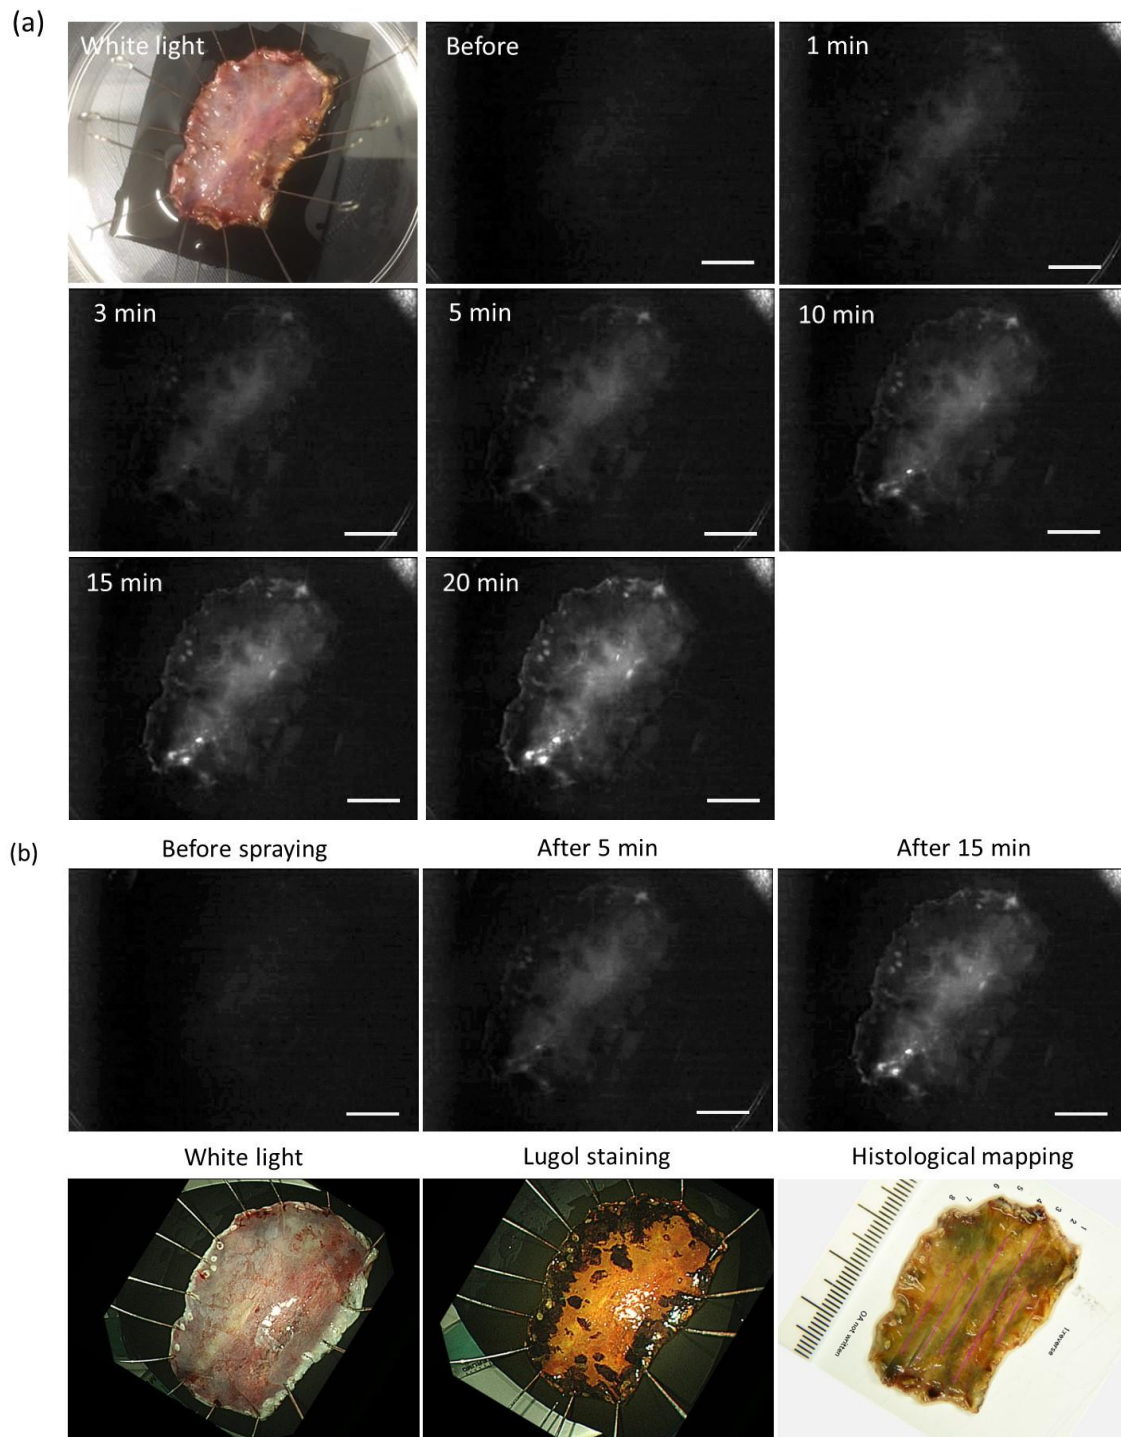

**No.2:** The ESD specimen of esophageal cancer was sprayed with **EP-SiR640**, then stained with Lugol's staining solution after the washing process.

The boundary between the tumor and normal tissues in this fluorescence image is clear, and is in good agreement with that in the Lugol's staining, as well as with the pathological diagnosis and distribution of the tumor. This specimen showed a large fluorescence increase compared with other specimens. The invasion depth of the tumor was SM2, which was the deepest among the specimens, and this might account for the intense fluorescence.

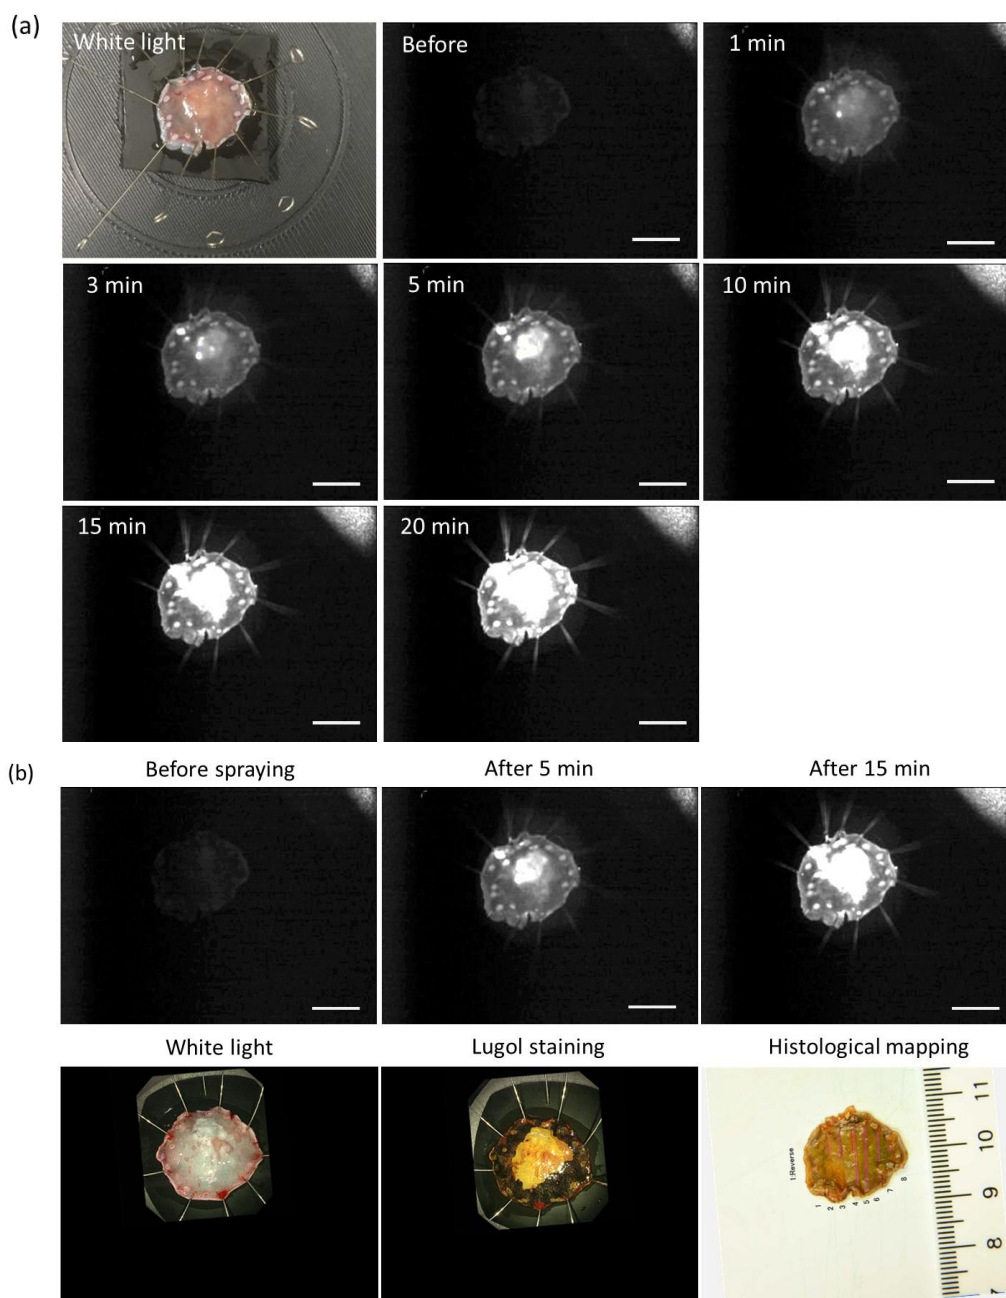



**No.3:** The ESD specimen of esophageal cancer was sprayed with **EP-SiR640**, then stained with Lugol's staining solution after the washing process.

The boundary between the tumor and normal tissues in this fluorescence image is basically in good agreement with that in the Lugol's staining, as well as with the pathological diagnosis and distribution of the tumor., though some parts of the boundary between the tumor and normal tissues in this fluorescence image are unclear.

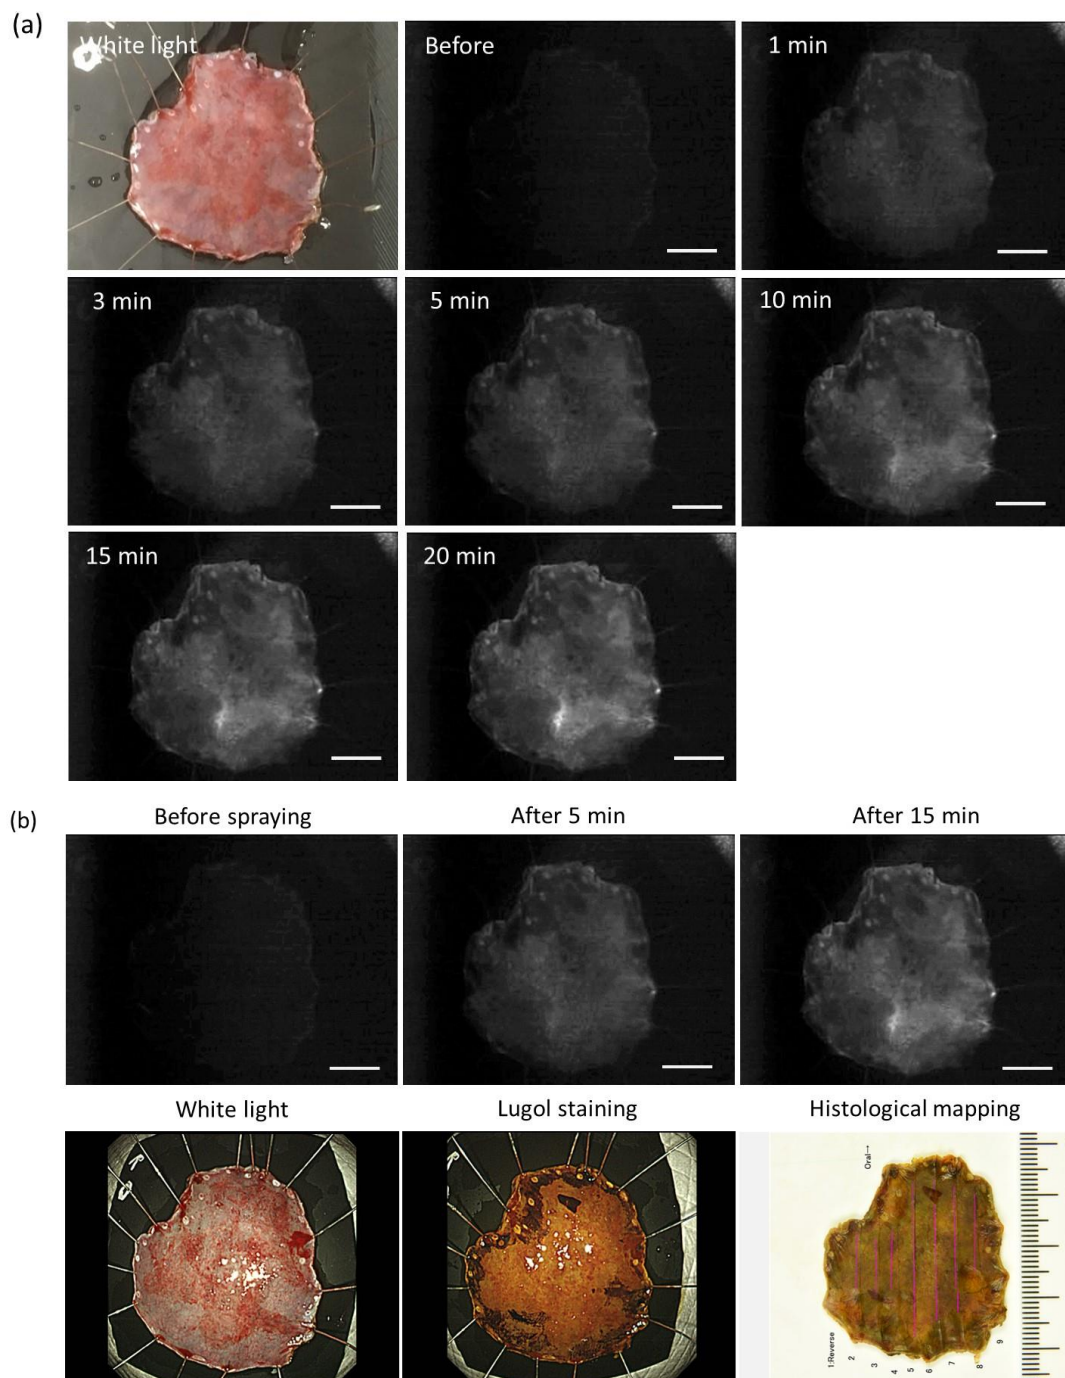

**No.4:** The ESD specimen of esophageal cancer was stained with Lugol's staining solution, then sprayed with **EP-SiR640** after the washing process.

Although a part of tumor (the center part of the fluorescence image) was not detected in the fluorescence image, most of the tumor was imaged. The tumor region showing saturated fluorescence signals may have been attached by the traction ESD method using clips or may include intraductal involvement.

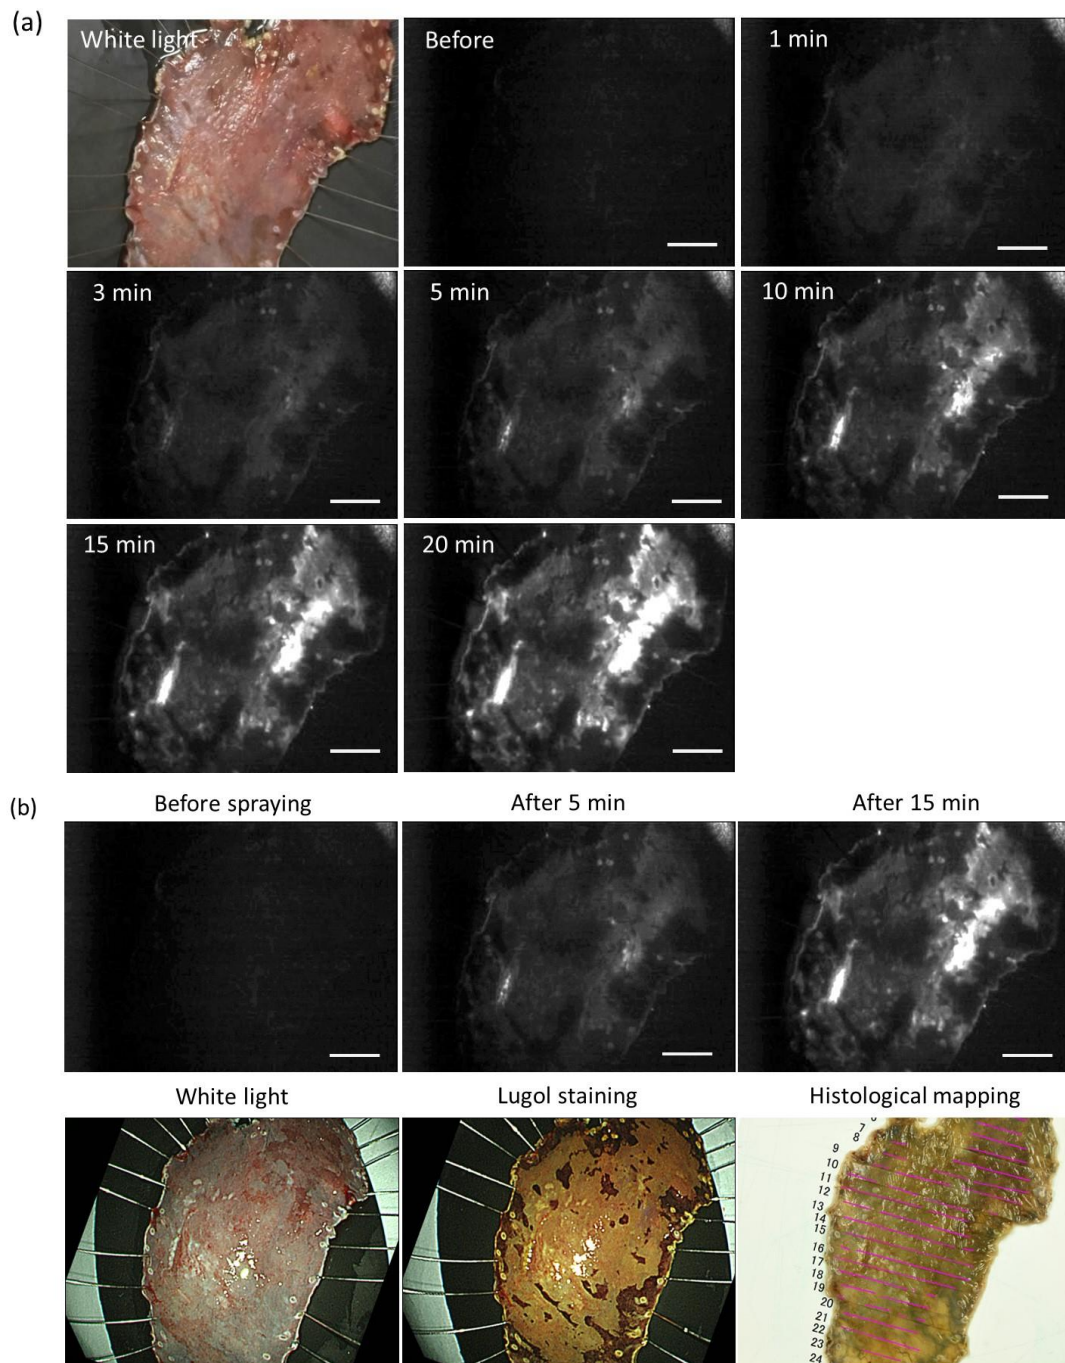

**No.5:** The ESD specimen of esophageal cancer was sprayed with **EP-SiR640**, then stained with Lugol's staining solution after the washing process.

It was difficult to identify the boundary between the tumor and normal tissues in this fluorescence image. Although a large fluorescence increase was observed in some parts of the tumor, a fluorescence increase was observed all over the specimen.

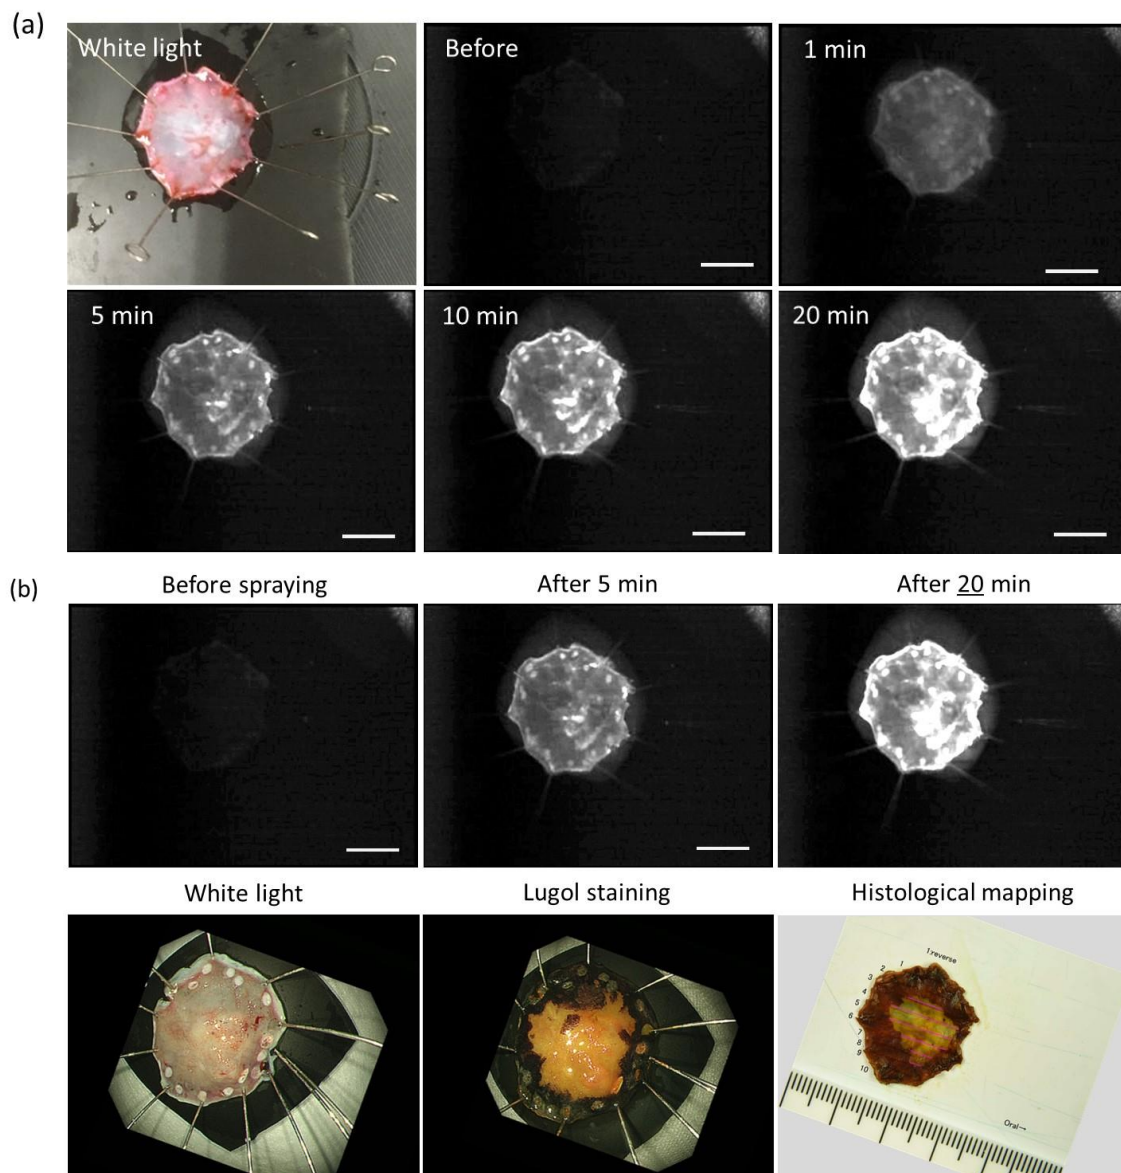



**No.6:** The ESD specimen of esophageal cancer was stained with Lugol's staining solution, then sprayed with **EP-SiR640** after the washing process.

It was difficult to identify the boundary between the tumor and normal tissues in this fluorescence image. Although a fluorescence increase was observed in the tumor, the normal region at the lower part of the specimen also showed a fluorescence increase.

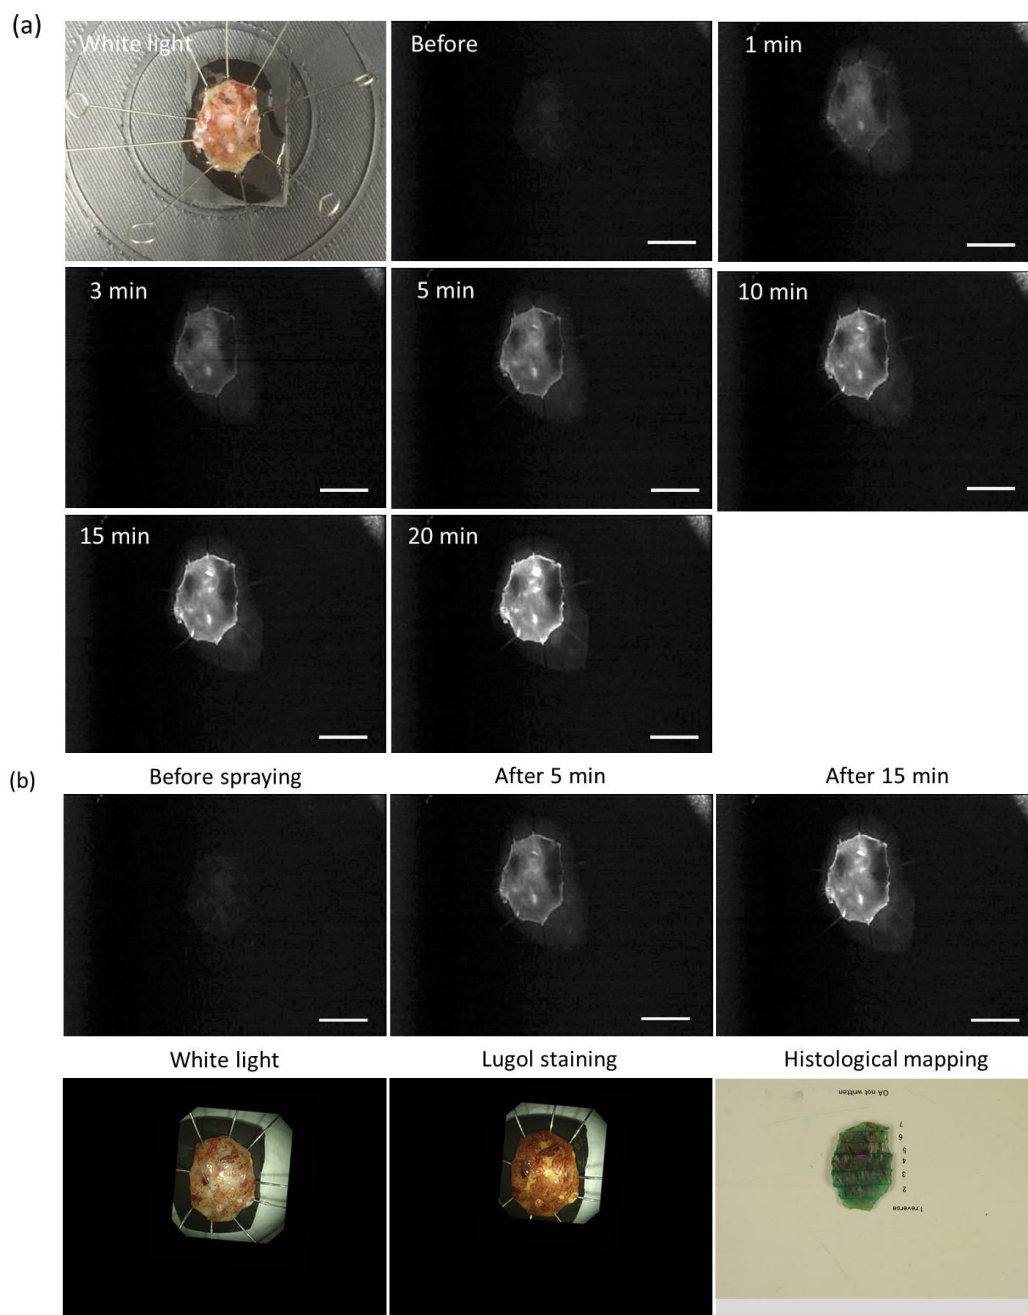

**Figure S23.** Fluorescence images of esophageal cancer in clinical specimens resected by ESD. Each specimen was sprayed with 50  $\mu$ M EP-SiR640 in PBS (pH = 7.4) containing 0.5% DMSO as a co-solvent, then the fluorescence

imaging was performed for 20 min using a Discovery<sup>TM</sup> imaging system. The excitation and emission wavelengths were 630 nm and 670 nm, respectively. Scale bars represent 10 mm. (b) Fluorescence images after 5 min and 15 (or 20) min after spraying of EP-SiR640, white-light images before and after Lugol dye staining and histological mapping of esophageal cancer in ESD specimens. Pink line indicates the tumor distribution.

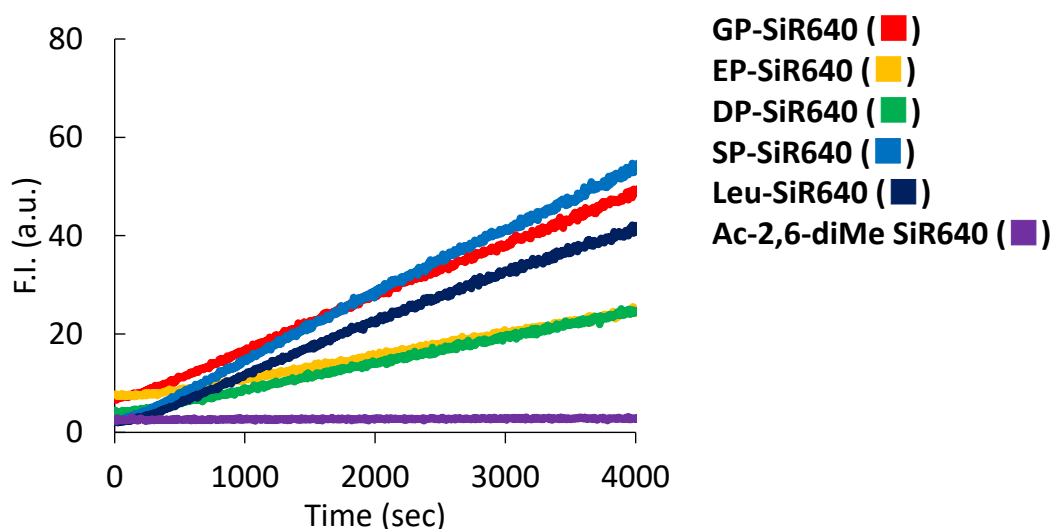

**Figure S24.** Stability experiment of the acylated SiR640s. Each probe (1  $\mu$ M) was dissolved in 10 mM HEPES buffer (pH = 7.4) containing 0.1% DMSO as a co-solvent. Time-course of the fluorescence intensity of each probe solution is shown. The vertical axis is largely magnified, compared to Figure 2c, Figure 3c and Figure S10. The excitation and emission wavelengths were 637 nm and 660 nm, respectively.

Note: The non-enzymatic fluorescence increases of **GP-SiR640**, **SP-SiR640** and **Leu-SiR640** were somewhat larger than those of **EP-SiR640** and **DP-SiR640**, on the other hand, **Ac-2,6-diMe SiR640** showed almost no non-enzymatic fluorescence increase. Thus, the non-enzymatic fluorescence increase of the acylated SiR640s was depended on the cleaved group, and the stability of the probe may be controlled by the structure of the cleaved group.

**Table S1.** Pathological diagnosis of each esophageal cancer patient

| No. | Location | Macroscopic type | Size (mm) | Deapth of invasion | Lymphatic (ly) or venous (v) invasion | Pathological horizontal margin (pHM) or vertical margin (pVM) |
|-----|----------|------------------|-----------|--------------------|---------------------------------------|---------------------------------------------------------------|
| 1   | Mt       | 0-IIc            | 36 × 20   | LPM                | ly0, v0                               | pHM0, pVM0                                                    |
| 2   | Ut       | 0-IIc            | 13 × 12   | SM2                | ly1, v1                               | pHM0, pVMX                                                    |
| 3   | MtLt     | 0-IIc            | 30 × 26   | MM                 | ly0, v0                               | pHM0, pVM0                                                    |
| 4   | MtLt     | 0-IIc            | 69 × 31   | LPM                | ly0, v0                               | pHM0, pVM0                                                    |
| 5   | Mt       | 0-IIa+IIc        | 13 × 13   | MM                 | ly0, v0                               | pHM0, pVM0                                                    |
| 6   | Lt       | 0-IIc            | 5 × 3     | EP                 | ly0, v0                               | pHM0, pVM0                                                    |

## Cartesian Coordinates and Total Electron Energies

### 2,6-diMe SiR640 (8)

LUMO -3.28 eV

HOMO -5.74 eV

E(RB3LYP) = -1407.17794764 a.u.

| Center | Atomic | Atomic | Coordinates (Angstroms) |           |           |
|--------|--------|--------|-------------------------|-----------|-----------|
| Number | Number | Type   | X                       | Y         | Z         |
| 1      | 6      | 0      | 3.422650                | -0.540282 | -0.029028 |
| 2      | 6      | 0      | 2.436737                | -1.559874 | -0.027864 |
| 3      | 6      | 0      | 1.092244                | -1.228044 | -0.025976 |
| 4      | 6      | 0      | 0.674270                | 0.156765  | -0.020804 |
| 5      | 6      | 0      | 1.708832                | 1.165917  | -0.026711 |
| 6      | 6      | 0      | 3.030103                | 0.830778  | -0.031511 |
| 7      | 6      | 0      | -0.689066               | 0.570535  | -0.007151 |
| 8      | 6      | 0      | -1.857285               | -0.275262 | 0.004019  |
| 9      | 6      | 0      | -1.812880               | -1.712618 | -0.000054 |
| 10     | 6      | 0      | -2.990192               | -2.440920 | 0.015443  |
| 11     | 1      | 0      | -2.960019               | -3.529119 | 0.011490  |
| 12     | 6      | 0      | -4.268620               | -1.819566 | 0.036349  |
| 13     | 6      | 0      | -4.317790               | -0.403196 | 0.038348  |
| 14     | 6      | 0      | -3.152344               | 0.329323  | 0.022395  |
| 15     | 1      | 0      | 2.744737                | -2.601520 | -0.020801 |
| 16     | 1      | 0      | 1.429380                | 2.213480  | -0.026405 |

|    |    |   |           |           |           |
|----|----|---|-----------|-----------|-----------|
| 17 | 1  | 0 | -5.279973 | 0.101790  | 0.053121  |
| 18 | 1  | 0 | -3.234097 | 1.409891  | 0.025006  |
| 19 | 14 | 0 | -0.170222 | -2.627401 | -0.027744 |
| 20 | 7  | 0 | 4.760789  | -0.656209 | -0.029680 |
| 21 | 6  | 0 | -0.001405 | -3.659013 | -1.599768 |
| 22 | 1  | 0 | -0.115269 | -3.038223 | -2.495837 |
| 23 | 1  | 0 | 0.982453  | -4.142375 | -1.641495 |
| 24 | 1  | 0 | -0.763637 | -4.447183 | -1.630799 |
| 25 | 6  | 0 | 0.030463  | -3.699526 | 1.512954  |
| 26 | 1  | 0 | -0.064728 | -3.102285 | 2.427007  |
| 27 | 1  | 0 | -0.731386 | -4.488228 | 1.539166  |
| 28 | 1  | 0 | 1.014300  | -4.184588 | 1.522440  |
| 29 | 6  | 0 | 4.277935  | 1.689281  | -0.063942 |
| 30 | 1  | 0 | 4.290667  | 2.441240  | 0.730458  |
| 31 | 1  | 0 | 4.362151  | 2.220261  | -1.019034 |
| 32 | 6  | 0 | 5.423133  | 0.658032  | 0.101601  |
| 33 | 1  | 0 | 5.901936  | 0.719223  | 1.087389  |
| 34 | 1  | 0 | 6.202313  | 0.752073  | -0.660915 |
| 35 | 6  | 0 | 5.530476  | -1.882042 | 0.075595  |
| 36 | 1  | 0 | 4.948111  | -2.729015 | -0.289933 |
| 37 | 1  | 0 | 6.434795  | -1.791636 | -0.533177 |
| 38 | 1  | 0 | 5.824734  | -2.070149 | 1.116787  |
| 39 | 7  | 0 | -5.400177 | -2.560942 | 0.052517  |
| 40 | 1  | 0 | -6.313680 | -2.128743 | 0.072267  |
| 41 | 6  | 0 | -0.945126 | 2.057943  | -0.002144 |
| 42 | 6  | 0 | -1.076695 | 2.746536  | -1.228678 |

|    |   |   |           |           |           |
|----|---|---|-----------|-----------|-----------|
| 43 | 6 | 0 | -1.051638 | 2.743061  | 1.228771  |
| 44 | 6 | 0 | -1.316334 | 4.127689  | -1.202459 |
| 45 | 6 | 0 | -1.291774 | 4.124256  | 1.211317  |
| 46 | 6 | 0 | -1.423822 | 4.815769  | 0.006625  |
| 47 | 1 | 0 | -1.419026 | 4.664199  | -2.142818 |
| 48 | 1 | 0 | -1.375352 | 4.658082  | 2.155085  |
| 49 | 1 | 0 | -1.610087 | 5.886732  | 0.010047  |
| 50 | 6 | 0 | -0.909600 | 2.020177  | 2.550571  |
| 51 | 1 | 0 | -1.652536 | 1.220611  | 2.658072  |
| 52 | 1 | 0 | 0.078045  | 1.554013  | 2.652795  |
| 53 | 1 | 0 | -1.040415 | 2.714298  | 3.386106  |
| 54 | 6 | 0 | -0.961305 | 2.027393  | -2.555103 |
| 55 | 1 | 0 | -1.706089 | 1.227917  | -2.649721 |
| 56 | 1 | 0 | -1.109156 | 2.723792  | -3.385883 |
| 57 | 1 | 0 | 0.024155  | 1.561751  | -2.678596 |
| 58 | 1 | 0 | -5.369310 | -3.571285 | 0.059970  |

---

**Ac-2,6-diMe SiR640 (9)**

LUMO -3.51 eV

HOMO -6.13 eV

E(RB3LYP) = -1559.84338708 a.u.

---

| Center | Atomic | Atomic | Coordinates (Angstroms) |   |   |
|--------|--------|--------|-------------------------|---|---|
| Number | Number | Type   | X                       | Y | Z |

---

|    |    |   |           |           |           |
|----|----|---|-----------|-----------|-----------|
| 1  | 6  | 0 | 3.602002  | -1.725266 | 0.009968  |
| 2  | 6  | 0 | 2.284054  | -2.263689 | 0.006552  |
| 3  | 6  | 0 | 1.191080  | -1.423306 | 0.004227  |
| 4  | 6  | 0 | 1.368850  | 0.021095  | 0.003120  |
| 5  | 6  | 0 | 2.728520  | 0.529080  | 0.004778  |
| 6  | 6  | 0 | 3.798968  | -0.307275 | 0.008396  |
| 7  | 6  | 0 | 0.301341  | 0.941264  | 0.000651  |
| 8  | 6  | 0 | -1.128932 | 0.631178  | 0.000024  |
| 9  | 6  | 0 | -1.660486 | -0.692710 | -0.000311 |
| 10 | 6  | 0 | -3.041633 | -0.897453 | -0.000749 |
| 11 | 1  | 0 | -3.446390 | -1.900950 | -0.001012 |
| 12 | 6  | 0 | -3.944490 | 0.183947  | -0.000624 |
| 13 | 6  | 0 | -3.426063 | 1.492636  | -0.000511 |
| 14 | 6  | 0 | -2.060220 | 1.704869  | -0.000258 |
| 15 | 1  | 0 | 2.149812  | -3.341000 | 0.001903  |
| 16 | 1  | 0 | 2.892028  | 1.600648  | 0.003519  |
| 17 | 1  | 0 | -4.101643 | 2.344541  | -0.000540 |
| 18 | 1  | 0 | -1.704986 | 2.728205  | -0.000145 |
| 19 | 14 | 0 | -0.532614 | -2.194275 | -0.000293 |
| 20 | 7  | 0 | 4.771389  | -2.368133 | 0.014001  |
| 21 | 6  | 0 | -0.785178 | -3.226858 | -1.559342 |
| 22 | 1  | 0 | -0.630259 | -2.626727 | -2.463155 |
| 23 | 1  | 0 | -0.086099 | -4.071668 | -1.584639 |
| 24 | 1  | 0 | -1.803468 | -3.633605 | -1.589046 |
| 25 | 6  | 0 | -0.790975 | -3.230558 | 1.555341  |
| 26 | 1  | 0 | -0.638805 | -2.632641 | 2.461093  |

|    |   |   |           |           |           |
|----|---|---|-----------|-----------|-----------|
| 27 | 1 | 0 | -1.809591 | -3.636778 | 1.580684  |
| 28 | 1 | 0 | -0.092487 | -4.075833 | 1.581084  |
| 29 | 6 | 0 | 5.286332  | -0.025124 | 0.018807  |
| 30 | 1 | 0 | 5.583477  | 0.517292  | 0.922271  |
| 31 | 1 | 0 | 5.592408  | 0.578663  | -0.840958 |
| 32 | 6 | 0 | 5.921037  | -1.438108 | -0.023841 |
| 33 | 1 | 0 | 6.573019  | -1.643230 | 0.831405  |
| 34 | 1 | 0 | 6.493859  | -1.620706 | -0.939924 |
| 35 | 6 | 0 | 4.997828  | -3.802868 | -0.008642 |
| 36 | 1 | 0 | 4.064245  | -4.340954 | 0.152864  |
| 37 | 1 | 0 | 5.423595  | -4.100776 | -0.974127 |
| 38 | 1 | 0 | 5.703605  | -4.070182 | 0.784282  |
| 39 | 7 | 0 | -5.336130 | 0.043875  | -0.000513 |
| 40 | 1 | 0 | -5.849506 | 0.917364  | -0.000742 |
| 41 | 6 | 0 | -6.107651 | -1.100644 | 0.000235  |
| 42 | 8 | 0 | -5.629195 | -2.234861 | 0.000745  |
| 43 | 6 | 0 | -7.604166 | -0.865076 | -0.000029 |
| 44 | 1 | 0 | -8.034996 | -1.350943 | 0.881518  |
| 45 | 1 | 0 | -7.886950 | 0.190616  | 0.003444  |
| 46 | 1 | 0 | -8.033675 | -1.344591 | -0.885747 |
| 47 | 6 | 0 | 0.653771  | 2.407553  | -0.000983 |
| 48 | 6 | 0 | 0.812746  | 3.083811  | -1.231167 |
| 49 | 6 | 0 | 0.811670  | 3.087180  | 1.227484  |
| 50 | 6 | 0 | 1.130669  | 4.449041  | -1.210700 |
| 51 | 6 | 0 | 1.129551  | 4.452362  | 1.203546  |
| 52 | 6 | 0 | 1.288372  | 5.132334  | -0.004445 |



|    |   |   |           |          |           |
|----|---|---|-----------|----------|-----------|
| 53 | 1 | 0 | 1.253748  | 4.977056 | -2.153340 |
| 54 | 1 | 0 | 1.251707  | 4.983002 | 2.144832  |
| 55 | 1 | 0 | 1.533562  | 6.191318 | -0.005786 |
| 56 | 6 | 0 | 0.651761  | 2.373393 | 2.552123  |
| 57 | 1 | 0 | -0.331298 | 1.895657 | 2.641435  |
| 58 | 1 | 0 | 1.403312  | 1.584431 | 2.679654  |
| 59 | 1 | 0 | 0.760326  | 3.075395 | 3.384160  |
| 60 | 6 | 0 | 0.653836  | 2.366405 | -2.553972 |
| 61 | 1 | 0 | -0.329867 | 1.889997 | -2.643432 |
| 62 | 1 | 0 | 0.764800  | 3.065803 | -3.387886 |
| 63 | 1 | 0 | 1.404304  | 1.575866 | -2.678002 |

**2,6-diMe JuloSiR (12)**

LUMO -3.24 eV

HOMO -5.71 eV

E(RB3LYP) = -1523.92334152 a.u.

| Center | Atomic | Atomic | Coordinates (Angstroms) |           |           |
|--------|--------|--------|-------------------------|-----------|-----------|
| Number | Number | Type   | X                       | Y         | Z         |
| 1      | 6      | 0      | 3.101183                | 0.029466  | -0.002810 |
| 2      | 6      | 0      | 2.236799                | -1.132083 | -0.028410 |
| 3      | 6      | 0      | 0.854986                | -1.001868 | 0.000590  |
| 4      | 6      | 0      | 0.249016                | 0.315757  | 0.031192  |
| 5      | 6      | 0      | 1.140266                | 1.436504  | 0.057333  |

|    |    |   |           |           |           |
|----|----|---|-----------|-----------|-----------|
| 6  | 6  | 0 | 2.505406  | 1.332799  | 0.054518  |
| 7  | 6  | 0 | -1.151118 | 0.582832  | 0.022846  |
| 8  | 6  | 0 | -2.220052 | -0.379594 | -0.028165 |
| 9  | 6  | 0 | -2.005278 | -1.796888 | -0.063653 |
| 10 | 6  | 0 | -3.088922 | -2.657692 | -0.122499 |
| 11 | 1  | 0 | -2.932411 | -3.734520 | -0.150731 |
| 12 | 6  | 0 | -4.430418 | -2.189459 | -0.146157 |
| 13 | 6  | 0 | -4.646019 | -0.788890 | -0.108304 |
| 14 | 6  | 0 | -3.575451 | 0.073844  | -0.051366 |
| 15 | 1  | 0 | 0.719813  | 2.435213  | 0.087690  |
| 16 | 1  | 0 | -5.660690 | -0.400633 | -0.124505 |
| 17 | 1  | 0 | -3.781864 | 1.137264  | -0.024225 |
| 18 | 14 | 0 | -0.271209 | -2.528151 | 0.001300  |
| 19 | 6  | 0 | -0.035317 | -3.629382 | -1.518009 |
| 20 | 1  | 0 | -0.088294 | -3.037912 | -2.439762 |
| 21 | 1  | 0 | 0.921898  | -4.160604 | -1.508100 |
| 22 | 1  | 0 | -0.832189 | -4.382659 | -1.556201 |
| 23 | 6  | 0 | -0.137964 | -3.512155 | 1.614856  |
| 24 | 1  | 0 | -0.293067 | -2.855519 | 2.479029  |
| 25 | 1  | 0 | -0.916302 | -4.285424 | 1.636185  |
| 26 | 1  | 0 | 0.828738  | -4.012054 | 1.737622  |
| 27 | 6  | 0 | 5.146018  | -1.386677 | 0.056962  |
| 28 | 1  | 0 | 5.500866  | -1.665564 | -0.945527 |
| 29 | 1  | 0 | 6.031025  | -1.230067 | 0.683760  |
| 30 | 7  | 0 | -5.469257 | -3.055027 | -0.204249 |
| 31 | 1  | 0 | -6.426392 | -2.729717 | -0.208408 |

|    |   |   |           |           |           |
|----|---|---|-----------|-----------|-----------|
| 32 | 6 | 0 | 4.670795  | 2.301164  | -0.691975 |
| 33 | 1 | 0 | 4.432734  | 2.161442  | -1.754053 |
| 34 | 1 | 0 | 5.359957  | 3.148593  | -0.617053 |
| 35 | 6 | 0 | 3.389506  | 2.556961  | 0.103114  |
| 36 | 1 | 0 | 2.846914  | 3.425159  | -0.285285 |
| 37 | 7 | 0 | 4.447672  | -0.095714 | -0.036674 |
| 38 | 6 | 0 | 5.359374  | 1.057819  | -0.147195 |
| 39 | 1 | 0 | 3.652359  | 2.787378  | 1.146320  |
| 40 | 6 | 0 | 2.921757  | -2.482382 | -0.115613 |
| 41 | 1 | 0 | 3.107942  | -2.732205 | -1.170769 |
| 42 | 1 | 0 | 2.284068  | -3.272376 | 0.283158  |
| 43 | 6 | 0 | 4.253759  | -2.470881 | 0.635325  |
| 44 | 1 | 0 | 4.759575  | -3.437556 | 0.544760  |
| 45 | 1 | 0 | 4.082123  | -2.285874 | 1.703247  |
| 46 | 1 | 0 | 5.787876  | 1.254619  | 0.845954  |
| 47 | 1 | 0 | 6.183111  | 0.750798  | -0.801030 |
| 48 | 6 | 0 | -1.574895 | 2.031870  | 0.061247  |
| 49 | 6 | 0 | -1.759785 | 2.738291  | -1.148254 |
| 50 | 6 | 0 | -1.796753 | 2.659496  | 1.307319  |
| 51 | 6 | 0 | -2.167358 | 4.078506  | -1.089711 |
| 52 | 6 | 0 | -2.203686 | 4.001150  | 1.322475  |
| 53 | 6 | 0 | -2.389213 | 4.709609  | 0.134829  |
| 54 | 1 | 0 | -2.311178 | 4.628209  | -2.016986 |
| 55 | 1 | 0 | -2.375834 | 4.490506  | 2.278282  |
| 56 | 1 | 0 | -2.705680 | 5.749188  | 0.163397  |
| 57 | 6 | 0 | -1.524331 | 2.081630  | -2.491053 |

|    |   |   |           |           |           |
|----|---|---|-----------|-----------|-----------|
| 58 | 1 | 0 | -2.163438 | 1.201306  | -2.630147 |
| 59 | 1 | 0 | -1.735264 | 2.781366  | -3.305280 |
| 60 | 1 | 0 | -0.486675 | 1.743018  | -2.599311 |
| 61 | 6 | 0 | -1.600909 | 1.917889  | 2.611757  |
| 62 | 1 | 0 | -2.241337 | 1.029762  | 2.673924  |
| 63 | 1 | 0 | -0.566034 | 1.574070  | 2.730151  |
| 64 | 1 | 0 | -1.838970 | 2.563464  | 3.462472  |
| 65 | 1 | 0 | -5.323719 | -4.055175 | -0.217467 |

-----

**Ac-2,6-diMe JuloSiR (13)**

LUMO -3.49 eV

HOMO -6.10 eV

E(RB3LYP) = -1676.58896006 a.u.

-----

| Center | Atomic | Atomic | Coordinates (Angstroms) |           |           |
|--------|--------|--------|-------------------------|-----------|-----------|
| Number | Number | Type   | X                       | Y         | Z         |
| -----  |        |        |                         |           |           |
| 1      | 6      | 0      | 3.481011                | -1.048334 | -0.022818 |
| 2      | 6      | 0      | 2.214576                | -1.763197 | -0.013753 |
| 3      | 6      | 0      | 1.009667                | -1.085220 | 0.029993  |
| 4      | 6      | 0      | 0.992524                | 0.372013  | 0.045397  |
| 5      | 6      | 0      | 2.268544                | 1.037130  | 0.044943  |
| 6      | 6      | 0      | 3.469467                | 0.390900  | 0.024032  |
| 7      | 6      | 0      | -0.164825               | 1.179084  | 0.046025  |
| 8      | 6      | 0      | -1.551253               | 0.724273  | 0.017692  |

|    |    |   |           |           |           |
|----|----|---|-----------|-----------|-----------|
| 9  | 6  | 0 | -1.924384 | -0.648942 | 0.005445  |
| 10 | 6  | 0 | -3.272834 | -1.010150 | -0.034621 |
| 11 | 1  | 0 | -3.561705 | -2.052618 | -0.044890 |
| 12 | 6  | 0 | -4.292806 | -0.039263 | -0.062328 |
| 13 | 6  | 0 | -3.928229 | 1.320893  | -0.044043 |
| 14 | 6  | 0 | -2.596596 | 1.687437  | -0.005275 |
| 15 | 1  | 0 | 2.286827  | 2.120559  | 0.067755  |
| 16 | 1  | 0 | -4.696356 | 2.089868  | -0.060895 |
| 17 | 1  | 0 | -2.359413 | 2.744291  | 0.005811  |
| 18 | 14 | 0 | -0.641809 | -2.022841 | 0.070239  |
| 19 | 6  | 0 | -0.892798 | -3.142390 | -1.432173 |
| 20 | 1  | 0 | -0.707016 | -2.593098 | -2.362671 |
| 21 | 1  | 0 | -0.238986 | -4.020199 | -1.416843 |
| 22 | 1  | 0 | -1.929304 | -3.501110 | -1.455093 |
| 23 | 6  | 0 | -0.887861 | -2.952032 | 1.702025  |
| 24 | 1  | 0 | -0.738818 | -2.278719 | 2.554199  |
| 25 | 1  | 0 | -1.915104 | -3.334609 | 1.751138  |
| 26 | 1  | 0 | -0.210977 | -3.804768 | 1.819975  |
| 27 | 6  | 0 | 4.770365  | -3.171355 | 0.013900  |
| 28 | 1  | 0 | 4.949616  | -3.564551 | -0.996272 |
| 29 | 1  | 0 | 5.663610  | -3.382516 | 0.611000  |
| 30 | 7  | 0 | -5.658735 | -0.338430 | -0.107838 |
| 31 | 1  | 0 | -6.270150 | 0.469488  | -0.130446 |
| 32 | 6  | 0 | -6.291895 | -1.564739 | -0.135226 |
| 33 | 8  | 0 | -5.685757 | -2.635915 | -0.111176 |
| 34 | 6  | 0 | -7.803848 | -1.504328 | -0.208038 |

|    |   |   |           |           |           |
|----|---|---|-----------|-----------|-----------|
| 35 | 1 | 0 | -8.218402 | -2.118426 | 0.597281  |
| 36 | 1 | 0 | -8.210838 | -0.492981 | -0.131463 |
| 37 | 1 | 0 | -8.125716 | -1.942658 | -1.159020 |
| 38 | 6 | 0 | 5.825271  | 0.388434  | -0.767488 |
| 39 | 1 | 0 | 5.532323  | 0.354532  | -1.824284 |
| 40 | 1 | 0 | 6.801914  | 0.879668  | -0.711140 |
| 41 | 6 | 0 | 4.776054  | 1.147571  | 0.045345  |
| 42 | 1 | 0 | 4.626124  | 2.159956  | -0.342956 |
| 43 | 7 | 0 | 4.652650  | -1.705671 | -0.077363 |
| 44 | 6 | 0 | 5.955918  | -1.024785 | -0.219794 |
| 45 | 1 | 0 | 5.127956  | 1.252866  | 1.082206  |
| 46 | 6 | 0 | 2.291605  | -3.275548 | -0.087695 |
| 47 | 1 | 0 | 2.329302  | -3.587652 | -1.141787 |
| 48 | 1 | 0 | 1.399961  | -3.733635 | 0.341672  |
| 49 | 6 | 0 | 3.534478  | -3.798893 | 0.631884  |
| 50 | 1 | 0 | 3.604121  | -4.887638 | 0.543817  |
| 51 | 1 | 0 | 3.483953  | -3.555467 | 1.700511  |
| 52 | 1 | 0 | 6.443329  | -1.020040 | 0.764791  |
| 53 | 1 | 0 | 6.564982  | -1.648350 | -0.882461 |
| 54 | 6 | 0 | 0.024902  | 2.676054  | 0.065928  |
| 55 | 6 | 0 | 0.118186  | 3.384298  | -1.153069 |
| 56 | 6 | 0 | 0.086074  | 3.352486  | 1.304745  |
| 57 | 6 | 0 | 0.275682  | 4.776679  | -1.110911 |
| 58 | 6 | 0 | 0.244309  | 4.745488  | 1.302747  |
| 59 | 6 | 0 | 0.338606  | 5.456520  | 0.105967  |
| 60 | 1 | 0 | 0.348480  | 5.328727  | -2.044999 |

|    |   |   |           |          |           |
|----|---|---|-----------|----------|-----------|
| 61 | 1 | 0 | 0.292595  | 5.273040 | 2.252434  |
| 62 | 1 | 0 | 0.459883  | 6.536625 | 0.121480  |
| 63 | 6 | 0 | 0.059599  | 2.672912 | -2.487301 |
| 64 | 1 | 0 | -0.859886 | 2.085210 | -2.595625 |
| 65 | 1 | 0 | 0.096242  | 3.392878 | -3.310238 |
| 66 | 1 | 0 | 0.899481  | 1.978311 | -2.612386 |
| 67 | 6 | 0 | -0.006773 | 2.606710 | 2.618091  |
| 68 | 1 | 0 | -0.928633 | 2.016786 | 2.687223  |
| 69 | 1 | 0 | 0.829738  | 1.908680 | 2.746775  |
| 70 | 1 | 0 | 0.008436  | 3.305096 | 3.460111  |

---

## 2,6-diMe QuinoSiR (20)

LUMO -3.32 eV

HOMO -5.68 eV

E(RB3LYP) = -1563.21938811 a.u.

---

| Center | Atomic | Atomic | Coordinates (Angstroms) |   |   |
|--------|--------|--------|-------------------------|---|---|
| Number | Number | Type   | X                       | Y | Z |

---

|   |   |   |           |           |           |
|---|---|---|-----------|-----------|-----------|
| 1 | 6 | 0 | -2.717737 | -0.805496 | 0.002436  |
| 2 | 6 | 0 | -1.632048 | -1.737774 | -0.007574 |
| 3 | 6 | 0 | -0.305270 | -1.354382 | -0.013423 |
| 4 | 6 | 0 | 0.034462  | 0.044187  | -0.009544 |
| 5 | 6 | 0 | -1.058954 | 0.968581  | -0.006138 |
| 6 | 6 | 0 | -2.386176 | 0.596043  | 0.000176  |

|    |    |   |           |           |           |
|----|----|---|-----------|-----------|-----------|
| 7  | 6  | 0 | 1.371918  | 0.542579  | -0.005108 |
| 8  | 6  | 0 | 2.582440  | -0.235011 | 0.008183  |
| 9  | 6  | 0 | 2.617505  | -1.674303 | 0.007364  |
| 10 | 6  | 0 | 3.833412  | -2.334152 | 0.032673  |
| 11 | 1  | 0 | 3.865495  | -3.422330 | 0.033503  |
| 12 | 6  | 0 | 5.075251  | -1.640944 | 0.057806  |
| 13 | 6  | 0 | 5.046044  | -0.223385 | 0.053018  |
| 14 | 6  | 0 | 3.842301  | 0.442015  | 0.028893  |
| 15 | 1  | 0 | -1.863674 | -2.795694 | -0.011013 |
| 16 | 1  | 0 | -0.832604 | 2.026591  | -0.006552 |
| 17 | 1  | 0 | 5.978710  | 0.334005  | 0.069871  |
| 18 | 1  | 0 | 3.862256  | 1.525499  | 0.027540  |
| 19 | 14 | 0 | 1.029203  | -2.683641 | -0.041337 |
| 20 | 6  | 0 | 0.894349  | -3.802042 | 1.472821  |
| 21 | 1  | 0 | 0.959016  | -3.222956 | 2.401085  |
| 22 | 1  | 0 | -0.060090 | -4.342830 | 1.472990  |
| 23 | 1  | 0 | 1.699874  | -4.546662 | 1.477273  |
| 24 | 6  | 0 | 0.926360  | -3.685785 | -1.638093 |
| 25 | 1  | 0 | 1.000037  | -3.037310 | -2.518618 |
| 26 | 1  | 0 | 1.738010  | -4.422064 | -1.686842 |
| 27 | 1  | 0 | -0.024495 | -4.230066 | -1.692912 |
| 28 | 6  | 0 | -4.278123 | -2.672726 | 0.016920  |
| 29 | 1  | 0 | -3.850066 | -3.149208 | 0.904552  |
| 30 | 1  | 0 | -5.351377 | -2.838926 | 0.030339  |
| 31 | 1  | 0 | -3.872026 | -3.150159 | -0.880505 |
| 32 | 7  | 0 | 6.245341  | -2.316776 | 0.084576  |



|    |   |   |           |           |           |
|----|---|---|-----------|-----------|-----------|
| 33 | 1 | 0 | 7.133252  | -1.833892 | 0.102616  |
| 34 | 6 | 0 | -4.743891 | 1.130327  | 0.016418  |
| 35 | 1 | 0 | -5.566690 | 1.841938  | 0.020716  |
| 36 | 6 | 0 | -3.478134 | 1.576334  | 0.005705  |
| 37 | 7 | 0 | -3.999358 | -1.229721 | 0.013003  |
| 38 | 6 | 0 | -5.181677 | -0.311305 | 0.024232  |
| 39 | 6 | 0 | -3.163817 | 3.051451  | -0.000716 |
| 40 | 1 | 0 | -2.572935 | 3.341284  | 0.877559  |
| 41 | 1 | 0 | -2.583738 | 3.335743  | -0.887965 |
| 42 | 1 | 0 | -4.085578 | 3.640177  | 0.003175  |
| 43 | 6 | 0 | -6.043496 | -0.559686 | -1.238835 |
| 44 | 1 | 0 | -6.476673 | -1.564466 | -1.255440 |
| 45 | 1 | 0 | -6.871714 | 0.156603  | -1.257741 |
| 46 | 1 | 0 | -5.444769 | -0.418517 | -2.144354 |
| 47 | 6 | 0 | -6.015368 | -0.554835 | 1.307029  |
| 48 | 1 | 0 | -6.842203 | 0.162405  | 1.342259  |
| 49 | 1 | 0 | -6.448940 | -1.559192 | 1.336277  |
| 50 | 1 | 0 | -5.396405 | -0.411477 | 2.198465  |
| 51 | 6 | 0 | 1.537589  | 2.042150  | -0.010086 |
| 52 | 6 | 0 | 1.609601  | 2.741071  | 1.215701  |
| 53 | 6 | 0 | 1.623202  | 2.728315  | -1.242187 |
| 54 | 6 | 0 | 1.771047  | 4.133477  | 1.187352  |
| 55 | 6 | 0 | 1.784419  | 4.120958  | -1.226553 |
| 56 | 6 | 0 | 1.858888  | 4.822511  | -0.022771 |
| 57 | 1 | 0 | 1.828366  | 4.678049  | 2.126921  |
| 58 | 1 | 0 | 1.852186  | 4.655673  | -2.171078 |

|    |   |   |          |           |           |
|----|---|---|----------|-----------|-----------|
| 59 | 1 | 0 | 1.984569 | 5.902248  | -0.027682 |
| 60 | 6 | 0 | 1.516850 | 2.020462  | 2.543086  |
| 61 | 1 | 0 | 2.316416 | 1.278653  | 2.658890  |
| 62 | 1 | 0 | 1.594405 | 2.729093  | 3.373032  |
| 63 | 1 | 0 | 0.565932 | 1.483915  | 2.647214  |
| 64 | 6 | 0 | 1.544539 | 1.994030  | -2.562991 |
| 65 | 1 | 0 | 2.342694 | 1.248152  | -2.660898 |
| 66 | 1 | 0 | 0.592950 | 1.459874  | -2.673304 |
| 67 | 1 | 0 | 1.634997 | 2.693593  | -3.399314 |
| 68 | 1 | 0 | 6.271168 | -3.327275 | 0.090862  |

---

**Ac-2,6-diMe QuinoSiR (21)**

LUMO -3.58 eV

HOMO -6.00 eV

E(RB3LYP) = -1715.88424074 a.u.

---

| Center | Atomic | Atomic | Coordinates (Angstroms) |   |   |
|--------|--------|--------|-------------------------|---|---|
| Number | Number | Type   | X                       | Y | Z |

---

|   |   |   |           |           |           |
|---|---|---|-----------|-----------|-----------|
| 1 | 6 | 0 | -3.078125 | -1.276892 | 0.007948  |
| 2 | 6 | 0 | -1.788362 | -1.908260 | -0.007064 |
| 3 | 6 | 0 | -0.605065 | -1.207188 | -0.020111 |
| 4 | 6 | 0 | -0.630168 | 0.239428  | -0.013851 |
| 5 | 6 | 0 | -1.927185 | 0.860386  | -0.004060 |
| 6 | 6 | 0 | -3.113920 | 0.168128  | 0.006257  |

|    |    |   |           |           |           |
|----|----|---|-----------|-----------|-----------|
| 7  | 6  | 0 | 0.525475  | 1.051241  | -0.012366 |
| 8  | 6  | 0 | 1.911729  | 0.593510  | -0.009255 |
| 9  | 6  | 0 | 2.301458  | -0.780489 | -0.020683 |
| 10 | 6  | 0 | 3.652949  | -1.127729 | -0.010476 |
| 11 | 1  | 0 | 3.950866  | -2.167849 | -0.019269 |
| 12 | 6  | 0 | 4.664960  | -0.146645 | 0.011174  |
| 13 | 6  | 0 | 4.286401  | 1.209835  | 0.018651  |
| 14 | 6  | 0 | 2.951025  | 1.563881  | 0.008603  |
| 15 | 1  | 0 | -1.749639 | -2.990186 | -0.009396 |
| 16 | 1  | 0 | -1.971806 | 1.941306  | -0.003271 |
| 17 | 1  | 0 | 5.046958  | 1.986248  | 0.033396  |
| 18 | 1  | 0 | 2.704358  | 2.618697  | 0.016083  |
| 19 | 14 | 0 | 1.023766  | -2.158524 | -0.061409 |
| 20 | 6  | 0 | 1.179497  | -3.273933 | 1.451921  |
| 21 | 1  | 0 | 1.081851  | -2.700171 | 2.380476  |
| 22 | 1  | 0 | 0.403545  | -4.049167 | 1.444382  |
| 23 | 1  | 0 | 2.154215  | -3.776906 | 1.461203  |
| 24 | 6  | 0 | 1.162719  | -3.150019 | -1.661142 |
| 25 | 1  | 0 | 1.062259  | -2.502498 | -2.539579 |
| 26 | 1  | 0 | 2.135195  | -3.654376 | -1.717106 |
| 27 | 1  | 0 | 0.382160  | -3.918985 | -1.710829 |
| 28 | 6  | 0 | -4.111118 | -3.478875 | 0.022852  |
| 29 | 1  | 0 | -3.575616 | -3.830302 | 0.909467  |
| 30 | 1  | 0 | -5.108586 | -3.907114 | 0.037983  |
| 31 | 1  | 0 | -3.600860 | -3.833853 | -0.877224 |
| 32 | 7  | 0 | 6.032578  | -0.433585 | 0.024161  |

|    |   |   |           |           |           |
|----|---|---|-----------|-----------|-----------|
| 33 | 1 | 0 | 6.637956  | 0.379357  | 0.040595  |
| 34 | 6 | 0 | 6.678355  | -1.655342 | 0.039130  |
| 35 | 8 | 0 | 6.081522  | -2.731028 | 0.020847  |
| 36 | 6 | 0 | 8.189217  | -1.573235 | 0.110332  |
| 37 | 1 | 0 | 8.614298  | -2.374518 | -0.498951 |
| 38 | 1 | 0 | 8.589905  | -0.612213 | -0.223450 |
| 39 | 1 | 0 | 8.502758  | -1.736374 | 1.148539  |
| 40 | 6 | 0 | -5.527508 | 0.083507  | 0.029641  |
| 41 | 1 | 0 | -6.504947 | 0.560516  | 0.037811  |
| 42 | 6 | 0 | -4.418118 | 0.838530  | 0.016714  |
| 43 | 7 | 0 | -4.202957 | -2.009157 | 0.021359  |
| 44 | 6 | 0 | -5.581662 | -1.420729 | 0.034861  |
| 45 | 6 | 0 | -4.488181 | 2.344567  | 0.012806  |
| 46 | 1 | 0 | -3.987283 | 2.772786  | 0.890313  |
| 47 | 1 | 0 | -4.002213 | 2.767389  | -0.875658 |
| 48 | 1 | 0 | -5.529045 | 2.679957  | 0.020619  |
| 49 | 6 | 0 | -6.348763 | -1.881688 | -1.229608 |
| 50 | 1 | 0 | -6.508816 | -2.963759 | -1.247153 |
| 51 | 1 | 0 | -7.332924 | -1.402358 | -1.245890 |
| 52 | 1 | 0 | -5.807366 | -1.589352 | -2.134794 |
| 53 | 6 | 0 | -6.320477 | -1.873855 | 1.318797  |
| 54 | 1 | 0 | -7.303710 | -1.393720 | 1.354241  |
| 55 | 1 | 0 | -6.480646 | -2.955712 | 1.346149  |
| 56 | 1 | 0 | -5.758771 | -1.576576 | 2.209897  |
| 57 | 6 | 0 | 0.321045  | 2.544721  | -0.009218 |
| 58 | 6 | 0 | 0.226712  | 3.233019  | 1.221120  |

|    |   |   |           |          |           |
|----|---|---|-----------|----------|-----------|
| 59 | 6 | 0 | 0.235138  | 3.236917 | -1.237980 |
| 60 | 6 | 0 | 0.046090  | 4.623052 | 1.200285  |
| 61 | 6 | 0 | 0.054207  | 4.626865 | -1.214006 |
| 62 | 6 | 0 | -0.039567 | 5.318848 | -0.006080 |
| 63 | 1 | 0 | -0.026839 | 5.160377 | 2.142863  |
| 64 | 1 | 0 | -0.012474 | 5.167134 | -2.155367 |
| 65 | 1 | 0 | -0.178869 | 6.396870 | -0.004847 |
| 66 | 6 | 0 | 0.313021  | 2.503343 | 2.543910  |
| 67 | 1 | 0 | 1.252919  | 1.946547 | 2.640789  |
| 68 | 1 | 0 | 0.254235  | 3.208858 | 3.377945  |
| 69 | 1 | 0 | -0.501779 | 1.778189 | 2.660431  |
| 70 | 6 | 0 | 0.330268  | 2.511364 | -2.562445 |
| 71 | 1 | 0 | 1.271674  | 1.956466 | -2.655555 |
| 72 | 1 | 0 | -0.482597 | 1.785170 | -2.685764 |
| 73 | 1 | 0 | 0.275099  | 3.219278 | -3.394696 |

-----

## Supporting references:

- [1] Y. Shimada, M. Imamura, T. Wagata, N. Yamaguchi, T. Tobe. *Cancer* **1992**, 69, 277-284.
- [2] A. D. Becke, *Phys. Rev. A* **1988**, 38, 3098–3100.
- [3] A. D. Becke, *J. Chem. Phys.* **1993**, 98, 1372–1377.
- [4] A. D. Becke, *J. Chem. Phys.* **1993**, 98, 5648–5652.
- [5] C. Lee, W. Yang, R. G. Parr, *Phys. Rev. B.* **1988**, 37, 785–789.
- [6] Gaussian 09, Revision A.02, M. J. Frisch, G. W. Trucks, H. B. Schlegel, G. E. Scuseria, M. A. Robb, J. R. Cheeseman, G. Scalmani, V. Barone, G. A. Petersson, H. Nakatsuji, X. Li, M. Caricato, A. Marenich, J. Bloino, B. G. Janesko, R. Gomperts, B. Mennucci, H. P. Hratchian, J. V. Ortiz, A. F. Izmaylov, J. L. Sonnenberg, D. Williams-Young, F. Ding, F. Lipparini, F. Egidi, J. Goings, B. Peng, A. Petrone, T. Henderson, D. Ranasinghe, V. G. Zakrzewski, J. Gao, N. Rega, G. Zheng, W. Liang, M. Hada, M. Ehara, K. Toyota, R. Fukuda, J. Hasegawa, M. Ishida, T. Nakajima, Y. Honda, O. Kitao, H. Nakai, T. Vreven, K. Throssell, J. A. Montgomery, Jr., J. E. Peralta, F. Ogliaro, M. Bearpark, J. J. Heyd, E. Brothers, K. N. Kudin, V. N. Staroverov, T. Keith, R. Kobayashi, J. Normand, K. Raghavachari, A. Rendell, J. C. Burant, S. S. Iyengar, J. Tomasi, M. Cossi, J. M. Millam, M. Klene, C. Adamo, R. Cammi, J. W. Ochterski, R. L. Martin, K. Morokuma, O. Farkas, J. B. Foresman, and D. J. Fox, Gaussian, Inc., Wallingford CT, 2016.
- [7] Y. Koide, Y. Urano, K. Hanaoka, W. Piao, M. Kusakabe, N. Saito, T. Terai, T. Okabe, T. Nagano, *J. Am. Chem. Soc.* **2012**, 134, 5029–5031.
- [8] T. Egawa, Y. Koide, K. Hanaoka, T. Komatsu, T. Terai, T. Nagano, *Chem. Commun.* **2011**, 47, 4162–4164.
- [9] K. Hanaoka, Y. Kagami, W. Piao, T. Myochin, K. Numasawa, Y. Kuriki, T. Ikeno, T. Ueno, T. Komatsu, T. Terai, T. Nagano, Y. Urano, *Chem. Commun* **2018**, 54, 6939-6942.
- [10] R. J. Iwatate, M. Kamiya, K. Umezawa, H. Kashima, M. Nakadate, R. Kojima, Y. Urano, *Bioconjug. Chem.* **2018**, 29, 241–244.
- [11] C. Reichardt, *Chem. Rev.* **1994**, 94, 2319-2358.
- [12] P. Puppan, *J. Photochem. Photobiol. A* **1990**, 50, 293-330.
- [13] H. Lu, S. C. Rutan, *Anal. Chem.* **1996**, 68, 1381-1386.
